# Supplementary material
Source: PubMed Central journal article supplement (PMC10336561)
Supplement: NIHMS1912475-supplement-Supporting_material.pdf [file NIHMS1912475-supplement-Supporting_material.pdf]

# Supporting Information

## Nano-Hydroxyapatite Stimulation of Gene Expression Requires Fgf Receptor, Phosphate Transporter, and Erk1/2 Signaling.

*Shin-Woo Ha<sup>†</sup>, Jonathan Park<sup>†</sup>, Mark M Habib<sup>‡</sup>, and George R. Beck Jr<sup>†, ‡, §, \*</sup>*

<sup>‡</sup> The Atlanta Department of Veterans Affairs Medical Center, Decatur, Georgia 30033, United States.

<sup>†</sup> Department of Medicine, Division of Endocrinology, Emory University, Atlanta, Georgia 30322, United States.

<sup>§</sup> The Winship Cancer Institute, Emory University School of Medicine, Atlanta, Georgia 30322, United States.

**\*Corresponding Author:** George R. Beck Jr., Ph.D., 101 Woodruff Circle, 1026 WMRB, Atlanta, Georgia 30322-0001, Tel: (404) 727-1340, Fax (404) 727-1300, E-Mail: [george.beck@emory.edu](mailto:george.beck@emory.edu)

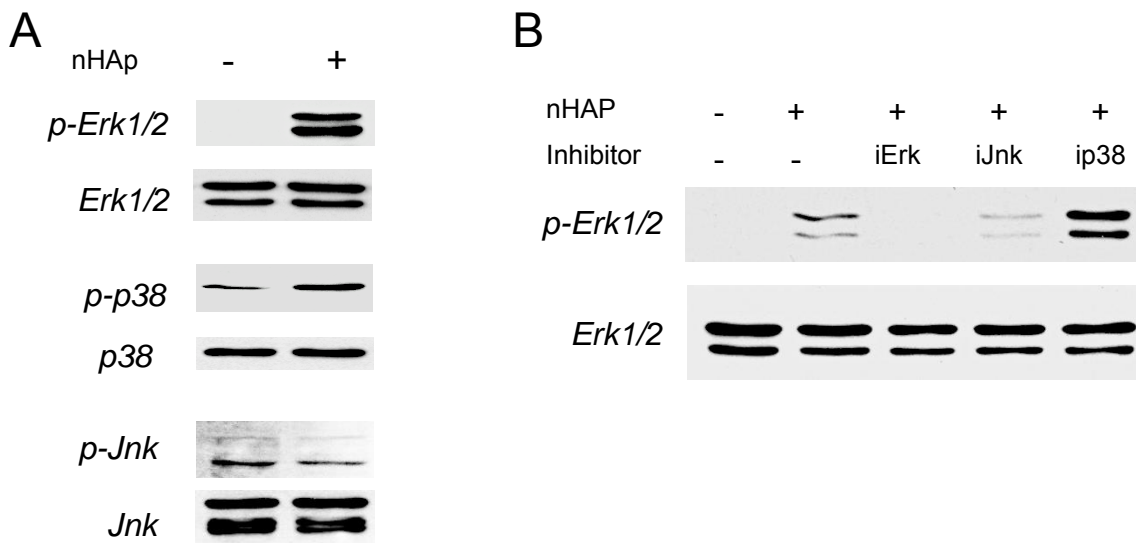

**Figure S1: (A) nHAp stimulates phosphorylation of Erk1/2 (p-Erk1/2) in the absence of serum.** BMCS were plated in standard growth medium and changed to serum free medium 1hr prior to treatment or not with nHAp for 15 minutes. The resulting lysate was analyzed by Western blotting and probed as indicated. **(B) nHAp stimulates phosphorylation of Erk1/2 (p-Erk1/2) in pre-osteoblasts.** MC3T3-E1 cells were pre-treated with inhibitors for Erk1/2 (30  $\mu$ M of U0126), Jnk (10  $\mu$ M of SP600125), and p38 (10  $\mu$ M of SB203580) for 1 hour followed by treatment with or without nHAp for 15 minutes. The resulting lysate was analyzed by Western blotting and probed as indicated.

A

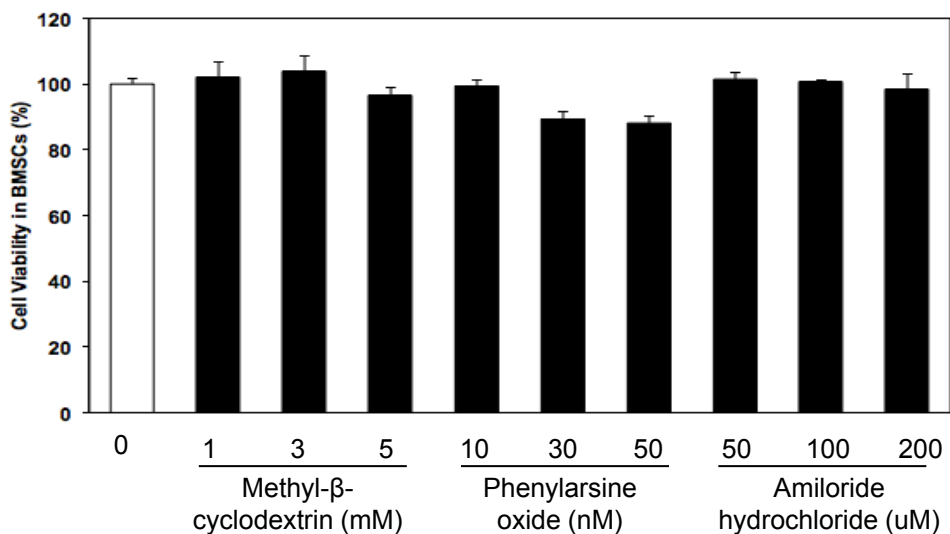

B

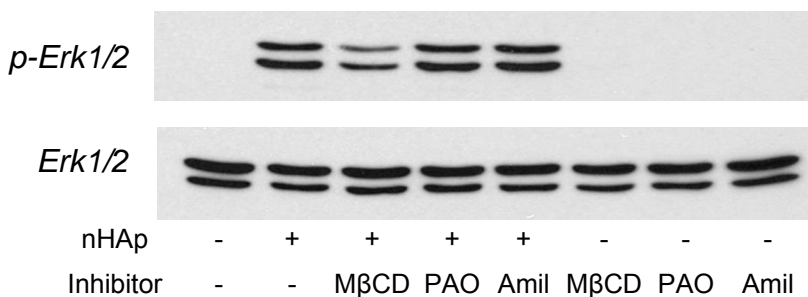

**Figure S2: (A) Viability study.** BMCS were plated in 96-well plates and treated with inhibitors as indicated for 24 hrs. Cell viability was measured by XTT assay. **(B) Inhibition of endocytosis does not block nHAp generated signals.** BMSCs were pretreated with inhibitors of lipid rafts/caveolae (5 mM of MβCD, methyl-β-cyclodextrin), Clathrin-mediated (50 nM of PAO, phenylarsine oxide) and Macropinocytosis (200 μM of Amiloride) for 1 hour. Cells were harvested 15 minutes after treatment with nHAp (25 μg/ml) and analyzed by Western blotting and probed with antibodies as indicated.

Table S1: Primers used for qRT-PCR

| Gene                | Forward                     | Reverse                     |
|---------------------|-----------------------------|-----------------------------|
| 18S (control)       | 5'-TTGACGGAAGGGCACCACCAG-3' | 5'-GCACCACCACCCACGGAATCG-3' |
| Alp ( <i>Alpl</i> ) | 5'-ACAGACCCTCCCCACGAGT-3'   | 5'-TGTACCCTGAGATTTCGTCCC-3' |
| Opn ( <i>Spp1</i> ) | 5'-ATTTGCTTTTGCCTGTTTGG-3'  | 5'-TGGCTATAGGATCTGGGTGC-3'  |
| Vdr                 | 5'-AGCCCTAAGCACGGGAAG-3'    | 5'-GCTCTCCTGGGAAGACTCAC-3'  |
| Lcn2                | 5'-AATGTCACCTCCATCCTGGT-3'  | 5'-ATTTCCCAGAGTGAAGTGGC-3'  |
| Nr4a1               | 5'-GCTAGAAGGACTGCGGAGC-3'   | 5'-ATTGAGCTTGAATACAGGGCA-3' |
| Igf1                | 5'-TGGATGCTCTTCAGTTCGTG-3'  | 5'-CACTCATCCACAATGCCTGT-3'  |
| Igf2                | 5'-CTTCTCCTCCGATCCTCCTG-3'  | 5'-TGAGAAGCACCAACATCGAC-3'  |
| Saa3                | 5'-TCCATTGCCATCATTCTTTG-3'  | 5'-AGTAGGCTCGCCACATGTCT-3'  |
| Dmp1                | 5'-TTCGCTGAGGTTTTGACCTT-3'  | 5'-CCCAAAGGAACACAAGGAGA-3'  |
| Ank                 | 5'-CACTACTGGCCCCTGATCC-3'   | 5'-ACTGCATCCTCCTTGACTGC-3'  |
| Ctsk                | 5'-CTTCCAATACGTGCAGCAGA-3'  | 5'-GCCGTGGCGTTATACATACA-3'  |
| Fgfr1               | 5'-TCACAGCCACTCTCTGCACT-3'  | 5'-GTGGACCAGGAGAGACTCCA     |
| Fgfr2               | 5'-ACCACACCTACCACCTCGAT-3'  | 5'-GACAAACTCCACATCCCCTC-3'  |
| Fgfr3               | 5'-TCGTGGCTGGAGCTACTTC-3'   | 5'-CTCCTGCTGGCTAGGTTCAG-3'  |
| Fgfr4               | 5'-CAGAGGCCTTTGGTATGGAT-3'  | 5'-CAGGTCTGCCAAATCCTTGT-3'  |
| Slc20A1             | 5'-ATTCTTCCTTGTTTCGTGCGT-3' | 5'-TGGAAAAGAGGTTGATTCCG-3'  |
| Slc20a2             | 5'-GACCTCGCCTTCGTCACCTT-3'  | 5'-CCATAGTTTTTCTCCCAGGC-3'  |
| Slc34a1             | 5'-GGGATGAGTCCCTGAGGAAT-3'  | 5'-ATGGCCTCTACCCTGGACAT-3'  |
| Slc34a2             | 5'-CTCCTGCTGTCCCTTACCTG-3'  | 5'-CGATGAATTTACCGGGGT-3'    |
| Slc34a3             | 5'-CAGCCCTGCAGACATGTTAAT-3' | 5'-AGACAGGCACCAGGTACCAC-3'  |











|       |          |                                                                                         |               |                  |             |      |             |      |        |          |   |
|-------|----------|-----------------------------------------------------------------------------------------|---------------|------------------|-------------|------|-------------|------|--------|----------|---|
| 4604  | 17209359 | ---                                                                                     |               |                  |             | ---  | <b>2.58</b> | 2.58 | 1.31   | 0        | 1 |
| 23807 | 17392821 | NM_198655 // 4921509C19Rik // RIKEN cDNA 4921509C19 gene // 2 G3 2 // 381393 /// ENSMUS | 4921509C19Rik | NM_198655        | <b>2.57</b> | 2.57 | 2.57        | 2.57 | 2.88   | 0        | 1 |
| 26099 | 17415375 | NR_033533 // Gm12603 // predicted gene 12603 // 4 C4 4 // 100040617 /// ENSMUST00000146 | Gm12603       | NR_033533        | <b>2.57</b> | 2.57 | 2.57        | 2.57 | 9.16   | 0        | 1 |
| 813   | 17201631 | ---                                                                                     |               |                  |             | ---  | <b>2.57</b> | 2.57 | 2.33   | 1.42E-14 | 1 |
| 2804  | 17205679 | ---                                                                                     |               |                  |             | ---  | <b>2.57</b> | 2.57 | 4.04   | 0        | 1 |
| 5103  | 17210369 | ---                                                                                     |               |                  |             | ---  | <b>2.57</b> | 2.57 | 4.35   | 0        | 1 |
| 22139 | 17375396 | NM_146126 // Sord // sorbitol dehydrogenase // 2 E5 2 60.59 cM // 20322 /// ENSMUST0000 | Sord          | NM_146126        | <b>2.57</b> | 2.57 | 2.57        | 2.57 | 6.68   | 0        | 1 |
| 1226  | 17202469 | ---                                                                                     |               |                  |             | ---  | <b>2.56</b> | 2.56 | 6.76   | 0        | 1 |
| 588   | 17201173 | ---                                                                                     |               |                  |             | ---  | <b>2.56</b> | 2.56 | 1.36   | 0        | 1 |
| 1660  | 17203349 | ---                                                                                     |               |                  |             | ---  | <b>2.56</b> | 2.56 | 1.31   | 0        | 1 |
| 5287  | 17210745 | ---                                                                                     |               |                  |             | ---  | <b>2.56</b> | 2.56 | 8.60   | 0        | 1 |
| 15421 | 17308952 | ENSMUST00000158641 // Gm22891 // predicted gene, 22891 // --- // ---                    | Gm22891       | VSMUST0000015864 | <b>2.56</b> | 2.56 | 2.56        | 2.56 | 0.96   | 5.68E-14 | 1 |
| 564   | 17201125 | ---                                                                                     |               |                  |             | ---  | <b>2.56</b> | 2.56 | 2.19   | 2.84E-14 | 1 |
| 19599 | 17350916 | NM_001033767 // Gm4951 // predicted gene 4951 // 18 D3 18 // 240327 /// ENSMUST00000031 | Gm4951        | NM_001033767     | <b>2.56</b> | 2.56 | 2.56        | 2.56 | 1.47   | 1.14E-13 | 1 |
| 32237 | 17476666 | NM_001099329 // Scgb1b24 // secretoglobin, family 1B, member 24 // 7 B1 7 // 100043860  | Scgb1b24      | NM_001099329     | <b>2.56</b> | 2.56 | 2.56        | 2.56 | 2.72   | 0        | 1 |
| 282   | 17200555 | ---                                                                                     |               |                  |             | ---  | <b>2.56</b> | 2.56 | 4.59   | 2.84E-14 | 1 |
| 69    | 17200123 | ---                                                                                     |               |                  |             | ---  | <b>2.56</b> | 2.56 | 4.69   | 8.53E-14 | 1 |
| 1765  | 17203567 | ---                                                                                     |               |                  |             | ---  | <b>2.55</b> | 2.55 | 1.80   | 2.84E-14 | 1 |
| 2992  | 17206063 | ---                                                                                     |               |                  |             | ---  | <b>2.55</b> | 2.55 | 1.91   | 0        | 1 |
| 36219 | 17514928 | NM_146527 // Olfr849 // olfactory receptor 849 // 9 A2-A5 9 // 258520 /// ENSMUST000000 | Olfr849       | NM_146527        | <b>2.55</b> | 2.55 | 2.55        | 2.55 | 1.10   | 0        | 1 |
| 32574 | 17480205 | NM_029494 // Rab30 // RAB30, member RAS oncogene family // 7 E1 7 // 75985 /// ENSMUSTO | Rab30         | NM_029494        | <b>2.54</b> | 2.54 | 2.54        | 2.54 | 3.99   | 0        | 1 |
| 30310 | 17459306 | ENSMUST00000103309 // Igkv17-127 // immunoglobulin kappa variable 17-127 // --- // ---  | Igkv17-127    | VSMUST0000010330 | <b>2.54</b> | 2.54 | 2.54        | 2.54 | 114.66 | 0        | 1 |
| 356   | 17200703 | ---                                                                                     |               |                  |             | ---  | <b>2.54</b> | 2.54 | 2.49   | 0        | 1 |
| 18116 | 17336502 | NM_010382 // H2-Eb1 // histocompatibility 2, class II antigen E beta // 17 B1 17 17.98  | H2-Eb1        | NM_010382        | <b>2.54</b> | 2.54 | 2.54        | 2.54 | 20.72  | 1.14E-13 | 1 |
| 32470 | 17479160 | ENSMUST00000158776 // Gm24880 // predicted gene, 24880 // --- // ---                    | Gm24880       | VSMUST0000015877 | <b>2.54</b> | 2.54 | 2.54        | 2.54 | 3.51   | 0        | 1 |
| 30839 | 17464099 | ENSMUST00000173695 // Gm20400 // predicted gene 20400 // --- // ---                     | Gm20400       | VSMUST0000017369 | <b>2.53</b> | 2.53 | 2.53        | 2.53 | 5.21   | 4.26E-14 | 1 |
| 31018 | 17465824 | NM_173375 // Fam180a // family with sequence similarity 180, member A // 6 B1 6 // 2081 | Fam180a       | NM_173375        | <b>2.53</b> | 2.53 | 2.53        | 2.53 | 7.72   | 1.42E-13 | 1 |
| 809   | 17201623 | ---                                                                                     |               |                  |             | ---  | <b>2.53</b> | 2.53 | 1.07   | 0        | 1 |
| 26279 | 17417407 | NM_181585 // Pik3r3 // phosphatidylinositol 3 kinase, regulatory subunit, polypeptide 3 | Pik3r3        | NM_181585        | <b>2.53</b> | 2.53 | 2.53        | 2.53 | 19.87  | 5.68E-14 | 1 |
| 782   | 17201567 | ---                                                                                     |               |                  |             | ---  | <b>2.53</b> | 2.53 | 1.17   | 0        | 1 |
| 5026  | 17210209 | ---                                                                                     |               |                  |             | ---  | <b>2.53</b> | 2.53 | 1.98   | 5.68E-14 | 1 |
| 3534  | 17207171 | ---                                                                                     |               |                  |             | ---  | <b>2.53</b> | 2.53 | 1.70   | 0        | 1 |
| 3571  | 17207247 | ---                                                                                     |               |                  |             | ---  | <b>2.53</b> | 2.53 | 1.61   | 0        | 1 |
| 19483 | 17349894 | NM_053134 // Pcdhb9 // protocadherin beta 9 // 18 B3 18 // 93880 /// ENSMUST00000057228 | Pcdhb9        | NM_053134        | <b>2.53</b> | 2.53 | 2.53        | 2.53 | 3.87   | 0        | 1 |
| 4501  | 17209149 | ---                                                                                     |               |                  |             | ---  | <b>2.53</b> | 2.53 | 1.79   | 0        | 1 |
| 34209 | 17494803 | ENSMUST00000078933 // Olfr502 // olfactory receptor 502 // 7 E3 7 // 258734 /// BC11923 | Olfr502       | VSMUST0000007893 | <b>2.52</b> | 2.52 | 2.52        | 2.52 | 1.38   | 0        | 1 |
| 14203 | 17298899 | NM_175008 // 4930474N05Rik // RIKEN cDNA 4930474N05 gene // 14 B 14 // 218921 /// ENSMU | 4930474N05Rik | NM_175008        | <b>2.52</b> | 2.52 | 2.52        | 2.52 | 2.10   | 1.42E-14 | 1 |
| 7320  | 17232235 | NM_010217 // Ctgf // connective tissue growth factor // 10 A3-B1 10 11.84 cM // 14219 / | Ctgf          | NM_010217        | <b>2.52</b> | 2.52 | 2.52        | 2.52 | 3.53   | 2.27E-13 | 1 |
| 39783 | 17547505 | ---                                                                                     |               |                  |             | ---  | <b>2.52</b> | 2.52 | 23.54  | 5.68E-14 | 1 |
| 1616  | 17203261 | ---                                                                                     |               |                  |             | ---  | <b>2.51</b> | 2.51 | 4.42   | 0        | 1 |
| 3146  | 17206375 | ---                                                                                     |               |                  |             | ---  | <b>2.51</b> | 2.51 | 3.27   | 0        | 1 |
| 12946 | 17287022 | ENSMUST00000157288 // Gm24915 // predicted gene, 24915 // --- // ---                    | Gm24915       | VSMUST0000015728 | <b>2.51</b> | 2.51 | 2.51        | 2.51 | 3.09   | 0        | 1 |
| 13546 | 17291881 | NM_001166391 // F13a1 // coagulation factor XIII, A1 subunit // 13 A3.3 13 // 74145 /// | F13a1         | NM_001166391     | <b>2.51</b> | 2.51 | 2.51        | 2.51 | 8.40   | 0        | 1 |
| 23002 | 17384569 | BC119215 // Olfr358 // olfactory receptor 358 // 2 B 2 // 227789 /// BC119217 // Olfr35 | Olfr358       | BC119215         | <b>2.51</b> | 2.51 | 2.51        | 2.51 | 1.96   | 0        | 1 |
| 3458  | 17207019 | ---                                                                                     |               |                  |             | ---  | <b>2.51</b> | 2.51 | 5.84   | 0        | 1 |
| 4966  | 17210087 | ---                                                                                     |               |                  |             | ---  | <b>2.51</b> | 2.51 | 11.38  | 8.53E-14 | 1 |
| 4963  | 17210081 | ---                                                                                     |               |                  |             | ---  | <b>2.51</b> | 2.51 | 5.11   | 8.53E-14 | 1 |
| 1089  | 17202193 | ---                                                                                     |               |                  |             | ---  | <b>2.50</b> | 2.50 | 4.19   | 7.11E-15 | 1 |
| 25815 | 17412728 | ENSMUST00000157714 // Gm22850 // predicted gene, 22850 // --- // ---                    | Gm22850       | VSMUST0000015771 | <b>2.50</b> | 2.50 | 2.50        | 2.50 | 2.94   | 0        | 1 |
| 20988 | 17364208 | ENSMUST00000087321 // Ppp1r3c // protein phosphatase 1, regulatory (inhibitor) subunit  | Ppp1r3c       | VSMUST0000008732 | <b>2.50</b> | 2.50 | 2.50        | 2.50 | 2.49   | 0        | 1 |
| 15658 | 17311519 | NM_010930 // Nov // nephroblastoma overexpressed gene // 15 D1 15 21.49 cM // 18133 /// | Nov           | NM_010930        | <b>2.49</b> | 2.49 | 2.49        | 2.49 | 62.79  | 0        | 1 |
| 4791  | 17209735 | ---                                                                                     |               |                  |             | ---  | <b>2.49</b> | 2.49 | 6.02   | 2.84E-14 | 1 |
| 19779 | 17352824 | NM_145492 // Zfp521 // zinc finger protein 521 // 18 A1 18 7.68 cM // 225207 /// ENSMUS | Zfp521        | NM_145492        | <b>2.49</b> | 2.49 | 2.49        | 2.49 | 15.21  | 0        | 1 |
| 25538 | 17409826 | NM_001190156 // Snx7 // sorting nexin 7 // 3 3 G2 // 76561 /// NM_029655 // Snx7 // sor | Snx7          | NM_001190156     | <b>2.49</b> | 2.49 | 2.49        | 2.49 | 33.60  | 2.27E-13 | 1 |
| 4283  | 17208703 | ---                                                                                     |               |                  |             | ---  | <b>2.49</b> | 2.49 | 1.61   | 2.84E-14 | 1 |
| 5415  | 17211562 | ENSMUST00000158125 // Gm24901 // predicted gene, 24901 // --- // ---                    | Gm24901       | VSMUST0000015812 | <b>2.48</b> | 2.48 | 2.48        | 2.48 | 1.24   | 0        | 1 |
| 34152 | 17494503 | NM_028444 // Prkcdpb // protein kinase C, delta binding protein // 7 7 F1 // 109042 /// | Prkcdpb       | NM_028444        | <b>2.48</b> | 2.48 | 2.48        | 2.48 | 18.61  | 5.68E-14 | 1 |
| 18947 | 17344434 | ENSMUST00000177607 // Gm23864 // predicted gene, 23864 // --- // ---                    | Gm23864       | VSMUST0000017760 | <b>2.48</b> | 2.48 | 2.48        | 2.48 | 3.28   | 5.68E-14 | 1 |
| 23340 | 17387997 | ENSMUST00000111523 // Olfr1254 // olfactory receptor 1254 // 2 E1 2 // 258468           | Olfr1254      | VSMUST0000011152 | <b>2.48</b> | 2.48 | 2.48        | 2.48 | 1.04   | 0        | 1 |
| 568   | 17201133 | ---                                                                                     |               |                  |             | ---  | <b>2.48</b> | 2.48 | 2.96   | 5.68E-14 | 1 |
| 6797  | 17226600 | ENSMUST00000082803 // Gm23056 // predicted gene, 23056 // --- // ---                    | Gm23056       | VSMUST0000008280 | <b>2.47</b> | 2.47 | 2.47        | 2.47 | 2.54   | 0        | 1 |
| 919   | 17201845 | ---                                                                                     |               |                  |             | ---  | <b>2.47</b> | 2.47 | 1.26   | 0        | 1 |
| 33792 | 17491634 | ENSMUST00000104584 // Gm22373 // predicted gene, 22373 // --- // ---                    | Gm22373       | VSMUST0000010458 | <b>2.47</b> | 2.47 | 2.47        | 2.47 | 1.73   | 4.26E-14 | 1 |
| 303   | 17200597 | ---                                                                                     |               |                  |             | ---  | <b>2.47</b> | 2.47 | 2.52   | 2.84E-14 | 1 |
| 5333  | 17210839 | ---                                                                                     |               |                  |             | ---  | <b>2.47</b> | 2.47 | 5.22   | 5.68E-14 | 1 |
| 1857  | 17203757 | ---                                                                                     |               |                  |             | ---  | <b>2.47</b> | 2.47 | 1.54   | 2.84E-14 | 1 |
| 1512  | 17203051 | ---                                                                                     |               |                  |             | ---  | <b>2.46</b> | 2.46 | 1.31   | 1.42E-13 | 1 |
| 16972 | 17325321 | ENSMUST00000077110 // Gm10092 // predicted gene 10092 // --- // ---                     | Gm10092       | VSMUST0000007711 | <b>2.46</b> | 2.46 | 2.46        | 2.46 | 1.42   | 0        | 1 |
| 1754  | 17203545 | ---                                                                                     |               |                  |             | ---  | <b>2.46</b> | 2.46 | 0.88   | 0        | 1 |
| 23325 | 17387940 | NM_146790 // Olfr1238 // olfactory receptor 1238 // 2 E1 2 // 258786 /// ENSMUST0000009 | Olfr1238      | NM_146790        | <b>2.46</b> | 2.46 | 2.46        | 2.46 | 1.63   | 0        | 1 |
| 1824  | 17203691 | ---                                                                                     |               |                  |             | ---  | <b>2.46</b> | 2.46 | 1.06   | 0        | 1 |
| 24356 | 17398285 | ENSMUST00000157223 // Gm25621 // predicted gene, 25621 // --- // ---                    | Gm25621       | VSMUST0000015722 | <b>2.46</b> | 2.46 | 2.46        | 2.46 | 1.31   | 0        | 1 |
| 17164 | 17326964 | NM_015755 // Hunk // hormonally upregulated Neu-associated kinase // 16 C3.3 16 51.71 c | Hunk          | NM_015755        | <b>2.46</b> | 2.46 | 2.46        | 2.46 | 3.29   | 2.27E-13 | 1 |
| 21881 | 17372828 | NM_146297 // Olfr1115 // olfactory receptor 1115 // 2 E1 2 // 258294 /// ENSMUST0000008 | Olfr1115      | NM_146297        | <b>2.46</b> | 2.46 | 2.46        | 2.46 | 1.29   | 0        | 1 |
| 9901  | 17257639 | XM_006534098 // 1810010H24Rik // RIKEN cDNA 1810010H24 gene // 11 E1 11 // 69066 ///    | 1810010H24Rik | XM_006534098     | <b>2.46</b> | 2.46 | 2.46        | 2.46 | 2.65   | 7.11E-15 | 1 |
| 23293 | 17387841 | ENSMUST00000090702 // Olfr1187-ps1 // olfactory receptor 1187, pseudogene 1 // --- // - | Olfr1187-ps1  | VSMUST0000009070 | <b>2.46</b> | 2.46 | 2.46        | 2.46 | 1.23   | 2.84E-14 | 1 |
| 476   | 17200947 | ---                                                                                     |               |                  |             | ---  | <b>2.46</b> | 2.46 | 4.66   | 0        | 1 |
| 2173  | 17204397 | ---                                                                                     |               |                  |             | ---  | <b>2.46</b> | 2.46 | 5.60   | 0        | 1 |
| 13856 | 17294736 | ENSMUST00000175608 // Gm26120 // predicted gene, 26120 // --- // ---                    | Gm26120       | VSMUST0000017560 | <b>2.46</b> | 2.46 | 2.46        | 2.46 | 1.85   | 2.84E-14 | 1 |
| 33411 | 17488076 | XM_006544161 // LOC101055953 // 39S ribosomal protein L41, mitochondrial-like // --- // | LOC101055953  | XM_006544161     | <b>2.46</b> | 2.46 | 2.46        | 2.46 | 2.37   | 0        | 1 |
| 4881  | 17209915 | ---                                                                                     |               |                  |             | ---  | <b>2.46</b> | 2.46 | 17.93  | 2.84E-14 | 1 |
| 4914  | 17209981 | ---                                                                                     |               |                  |             | ---  | <b>2.45</b> | 2.45 | 3.33   | 2.84E-14 | 1 |
| 2380  | 17204819 | ---                                                                                     |               |                  |             | ---  | <b>2.45</b> | 2.45 | 3.39   | 1.42E-14 | 1 |
| 2858  | 17205791 | ---                                                                                     |               |                  |             | ---  | <b>2.45</b> | 2.45 | 2.34   | 0        | 1 |
| 9170  | 17249980 | NM_018738 // Igtp // interferon gamma induced GTPase // 11 B1.3 11 36.01 cM // 16145 // | Igtp          | NM_018738        | <b>2.45</b> | 2.45 | 2.45        | 2.45 | 5.88   | 5.68E-14 | 1 |
| 16191 | 17317056 | NM_001136077 // Enpp2 // ectonucleotide pyrophosphatase/phosphodiesterase 2 // 15 15 D2 | Enpp2         | NM_001136077     | <b>2.45</b> | 2.45 | 2.45        | 2.45 | 10.91  | 5.68E-14 | 1 |
| 1099  | 17202213 | ---                                                                                     |               |                  |             | ---  | <b>2.45</b> | 2.45 | 1.64   | 2.84E-14 | 1 |
| 38512 | 17537975 | XM_006528659 // Gm15026 // predicted gene 15026 // X X 59.1 cM // 100862124 /// ENSMUST | Gm15026       | XM_006528659     | <b>2.45</b> | 2.45 | 2.45        | 2.45 | 1.50   | 0        | 1 |
| 5215  | 17210595 | ---                                                                                     |               |                  |             | ---  | <b>2.45</b> | 2.45 | 2.23   | 1.42E-14 | 1 |
| 806   | 17201617 | ---                                                                                     |               |                  |             | ---  | <b>2.45</b> | 2.45 | 1.11   | 0        | 1 |
| 3264  | 17206621 | ---                                                                                     |               |                  |             | ---  | <b>2.45</b> | 2.45 | 1.95   | 0        | 1 |
| 7670  | 17235511 | NM_008655 // Gadd45b // growth arrest and DNA-damage-inducible 45 beta // 10 C1 10 39.7 | Gadd45b       | NM_008655        | <b>2.45</b> | 2.45 | 2.45        | 2.45 | 1.98   | 0        | 1 |
| 28279 | 17438571 | ---                                                                                     |               |                  |             | ---  | <b>2.44</b> | 2.44 | 2.68   | 0        | 1 |
| 4701  | 17209553 | ---                                                                                     |               |                  |             | ---  | <b>2.44</b> | 2.44 | 12.97  | 5.68E-14 | 1 |
| 29153 | 17448235 | NR_045078 // Gm3716 // predicted gene 3716 // 5 C3.1 5 // 100042198                     | Gm3716        | NR_045078        | <b>2.44</b> | 2.44 | 2.44        | 2.44 | 8.58   | 0        | 1 |

|       |          |                                                                                         |               |                   |             |      |        |          |   |
|-------|----------|-----------------------------------------------------------------------------------------|---------------|-------------------|-------------|------|--------|----------|---|
| 15579 | 17310797 | ENSMUST00000157211 // Gm23956 // predicted gene, 23956 // --- // ---                    | Gm23956       | VSMUST000001572:  | <b>2.44</b> | 2.44 | 1.11   | 0        | 1 |
| 9053  | 17248896 | NM_053166 // Trim7 // tripartite motif-containing 7 // 11 B1.2 11 // 94089 /// XM_00653 | Trim7         | NM_053166         | <b>2.44</b> | 2.44 | 2.01   | 5.68E-14 | 1 |
| 5243  | 17210653 | ---                                                                                     | ---           | ---               | <b>2.44</b> | 2.44 | 3.59   | 2.84E-14 | 1 |
| 2067  | 17204185 | ---                                                                                     | ---           | ---               | <b>2.44</b> | 2.44 | 7.26   | 0        | 1 |
| 33850 | 17492018 | NM_201639 // Synm // synemin, intermediate filament protein // 7 C 7 // 233335 /// NM_2 | Synm          | NM_201639         | <b>2.44</b> | 2.44 | 3.17   | 5.68E-14 | 1 |
| 3067  | 17206217 | ---                                                                                     | ---           | ---               | <b>2.44</b> | 2.44 | 1.77   | 2.84E-14 | 1 |
| 14942 | 17304336 | ENSMUST00000158057 // Gm23999 // predicted gene, 23999 // --- // ---                    | Gm23999       | VSMUST0000015805: | <b>2.43</b> | 2.43 | 0.96   | 0        | 1 |
| 12661 | 17284652 | ENSMUST00000163670 // Ighv1-78 // immunoglobulin heavy variable 1-78 // --- // ---      | Ighv1-78      | VSMUST000001636:  | <b>2.43</b> | 2.43 | 159.53 | 5.68E-14 | 1 |
| 13444 | 17291098 | ENSMUST00000073728 // Vmn1r211 // vomeronasal 1 receptor 211 // 13 A3.1 13 // 171277 // | Vmn1r211      | VSMUST000000737:  | <b>2.43</b> | 2.43 | 1.03   | 0        | 1 |
| 34723 | 17499962 | NM_008872 // Plat // plasminogen activator, tissue // 8 A2 8 11.42 cM // 18791 /// ENSM | Plat          | NM_008872         | <b>2.42</b> | 2.42 | 13.11  | 0        | 1 |
| 2030  | 17204111 | ---                                                                                     | ---           | ---               | <b>2.42</b> | 2.42 | 10.88  | 0        | 1 |
| 23379 | 17388435 | NM_183180 // Tspan18 // tetraspanin 18 // 2 E1 2 // 241556 /// XM_006499474 // Tspan18  | Tspan18       | NM_183180         | <b>2.42</b> | 2.42 | 2.26   | 0        | 1 |
| 25664 | 17411172 | ENSMUST00000157372 // Gm25056 // predicted gene, 25056 // --- // ---                    | Gm25056       | VSMUST000001573:  | <b>2.42</b> | 2.42 | 2.27   | 0        | 1 |
| 21884 | 17372837 | BC119117 // Olfr1120 // olfactory receptor 1120 // 2 E1 2 // 259031 /// BC119143 // Olf | Olfr1120      | BC119117          | <b>2.42</b> | 2.42 | 1.43   | 0        | 1 |
| 35647 | 17509433 | ENSMUST00000104397 // Gm24375 // predicted gene, 24375 // --- // ---                    | Gm24375       | VSMUST000001043:  | <b>2.42</b> | 2.42 | 2.02   | 0        | 1 |
| 29349 | 17449530 | ---                                                                                     | ---           | ---               | <b>2.42</b> | 2.42 | 2.31   | 5.68E-14 | 1 |
| 12593 | 17284469 | ENSMUST00000103476 // Ighv3-3 // immunoglobulin heavy variable V3-3 // --- // ---       | Ighv3-3       | VSMUST000001034:  | <b>2.42</b> | 2.42 | 31.35  | 0        | 1 |
| 3629  | 17207375 | ---                                                                                     | ---           | ---               | <b>2.42</b> | 2.42 | 4.78   | 0        | 1 |
| 16802 | 17323587 | ENSMUST00000170279 // Rpl26-ps4 // ribosomal protein L26, pseudogene 4 // --- // ---    | Rpl26-ps4     | VSMUST000001702:  | <b>2.42</b> | 2.42 | 1.33   | 0        | 1 |
| 8542  | 17243761 | ENSMUST00000070435 // Fabp3-ps1 // fatty acid binding protein 3, muscle and heart, pseu | Fabp3-ps1     | VSMUST000000704:  | <b>2.41</b> | 2.41 | 3.61   | 0        | 1 |
| 1189  | 17202395 | ---                                                                                     | ---           | ---               | <b>2.41</b> | 2.41 | 2.17   | 1.71E-13 | 1 |
| 35500 | 17507945 | NM_139221 // Defb11 // defensin beta 11 // 8 A2 8 // 246081                             | Defb11        | NM_139221         | <b>2.41</b> | 2.41 | 1.93   | 4.26E-14 | 1 |
| 712   | 17201425 | ---                                                                                     | ---           | ---               | <b>2.41</b> | 2.41 | 1.21   | 0        | 1 |
| 24844 | 17403237 | NM_001289492 // Gbp3 // guanylate binding protein 3 // 3 H1 3 // 55932 /// NM_001289493 | Gbp3          | NM_001289492      | <b>2.41</b> | 2.41 | 2.06   | 1.71E-13 | 1 |
| 8877  | 17247389 | NM_007912 // Egfr // epidermal growth factor receptor // 11 A1-A4 11 9.41 cM // 13649 / | Egfr          | NM_007912         | <b>2.41</b> | 2.41 | 11.27  | 1.71E-13 | 1 |
| 743   | 17201487 | ---                                                                                     | ---           | ---               | <b>2.41</b> | 2.41 | 1.22   | 0        | 1 |
| 21650 | 17370596 | ---                                                                                     | ---           | ---               | <b>2.41</b> | 2.41 | 0.92   | 0        | 1 |
| 37434 | 17527661 | NM_001195431 // Islr // immunoglobulin superfamily containing leucine-rich repeat // 9  | Islr          | NM_001195431      | <b>2.41</b> | 2.41 | 6.97   | 1.14E-13 | 1 |
| 2063  | 17204177 | ---                                                                                     | ---           | ---               | <b>2.41</b> | 2.41 | 7.63   | 2.84E-14 | 1 |
| 35370 | 17506882 | ENSMUST00000116866 // Gm22197 // predicted gene, 22197 // --- // ---                    | Gm22197       | VSMUST000001168:  | <b>2.40</b> | 2.40 | 1.84   | 0        | 1 |
| 4194  | 17208523 | ---                                                                                     | ---           | ---               | <b>2.40</b> | 2.40 | 2.88   | 5.68E-14 | 1 |
| 8301  | 17241032 | NM_029083 // Ddit4 // DNA-damage-inducible transcript 4 // 10 10 B3 // 74747 /// ENSMUS | Ddit4         | NM_029083         | <b>2.40</b> | 2.40 | 1.79   | 0        | 1 |
| 31832 | 17473423 | NM_173008 // Ssc5d // scavenger receptor cysteine rich domain containing (5 domains) // | Ssc5d         | NM_173008         | <b>2.40</b> | 2.40 | 13.18  | 5.68E-14 | 1 |
| 32661 | 17481167 | NM_147053 // Olfr582 // olfactory receptor 582 // 7 E3 7 // 259055 /// ENSMUST000000982 | Olfr582       | NM_147053         | <b>2.40</b> | 2.40 | 1.22   | 0        | 1 |
| 4291  | 17208719 | ---                                                                                     | ---           | ---               | <b>2.40</b> | 2.40 | 2.52   | 0        | 1 |
| 14261 | 17299258 | XR_383402 // LOC102638002 // uncharacterized LOC102638002 // --- // 102638002 /// XR_39 | LOC102638002  | XR_383402         | <b>2.40</b> | 2.40 | 4.97   | 0        | 1 |
| 3258  | 17206609 | ---                                                                                     | ---           | ---               | <b>2.40</b> | 2.40 | 1.20   | 0        | 1 |
| 2388  | 17204835 | ---                                                                                     | ---           | ---               | <b>2.40</b> | 2.40 | 1.40   | 2.84E-14 | 1 |
| 40620 | 17549288 | ---                                                                                     | ---           | ---               | <b>2.40</b> | 2.40 | 4.16   | 0        | 1 |
| 20506 | 17359466 | NM_023418 // Pgam1 // phosphoglycerate mutase 1 // 19 C3 19 // 18648 /// ENSMUST0000001 | Pgam1         | NM_023418         | <b>2.39</b> | 2.39 | 3.89   | 5.68E-14 | 1 |
| 6679  | 17225259 | ENSMUST00000158988 // Gm23504 // predicted gene, 23504 // --- // ---                    | Gm23504       | VSMUST000001589:  | <b>2.39</b> | 2.39 | 2.40   | 5.68E-14 | 1 |
| 906   | 17201819 | ---                                                                                     | ---           | ---               | <b>2.39</b> | 2.39 | 1.25   | 2.84E-14 | 1 |
| 992   | 17201995 | ---                                                                                     | ---           | ---               | <b>2.39</b> | 2.39 | 1.25   | 2.84E-14 | 1 |
| 25886 | 17413352 | ENSMUST00000030183 // Car9 // carbonic anhydrase 9 // 4 B1 4 // 230099 /// NM_139305 // | Car9          | VSMUST000000301:  | <b>2.39</b> | 2.39 | 15.94  | 1.14E-13 | 1 |
| 12954 | 17287081 | NM_031166 // Id4 // inhibitor of DNA binding 4 // 13 B 13 24.71 cM // 15904 /// ENSMUST | Id4           | NM_031166         | <b>2.39</b> | 2.39 | 16.71  | 2.84E-13 | 1 |
| 38991 | 17541875 | NM_152801 // Arhgef6 // Rac/Cdc42 guanine nucleotide exchange factor (GEF) 6 // X A5 X  | Arhgef6       | NM_152801         | <b>2.38</b> | 2.38 | 3.55   | 0        | 1 |
| 15621 | 17311191 | NM_026778 // Cthrc1 // collagen triple helix repeat containing 1 // 15 15 C // 68588 // | Cthrc1        | NM_026778         | <b>2.38</b> | 2.38 | 3.79   | 2.27E-13 | 1 |
| 3213  | 17206515 | ---                                                                                     | ---           | ---               | <b>2.38</b> | 2.38 | 1.41   | 0        | 1 |
| 3162  | 17206407 | ---                                                                                     | ---           | ---               | <b>2.38</b> | 2.38 | 1.37   | 1.42E-14 | 1 |
| 34040 | 17493912 | NM_019915 // Art2b // ADP-ribosyltransferase 2b // 7 E3 7 54.61 cM // 11872 /// XM_0065 | Art2b         | NM_019915         | <b>2.38</b> | 2.38 | 96.77  | 5.68E-14 | 1 |
| 2365  | 17204789 | ---                                                                                     | ---           | ---               | <b>2.38</b> | 2.38 | 3.70   | 1.71E-13 | 1 |
| 9070  | 17248984 | NM_207574 // Olfr1383 // olfactory receptor 1383 // 11 B1.2 11 // 404337 /// ENSMUST000 | Olfr1383      | NM_207574         | <b>2.38</b> | 2.38 | 2.51   | 0        | 1 |
| 31253 | 17467516 | ENSMUST00000103377 // Igvk6-32 // immunoglobulin kappa variable 6-32 // --- // ---      | Igvk6-32      | VSMUST000001033:  | <b>2.38</b> | 2.38 | 94.15  | 0        | 1 |
| 2972  | 17206019 | ---                                                                                     | ---           | ---               | <b>2.38</b> | 2.38 | 4.78   | 0        | 1 |
| 20903 | 17363370 | ENSMUST00000157745 // Gm22880 // predicted gene, 22880 // --- // ---                    | Gm22880       | VSMUST000001577:  | <b>2.38</b> | 2.38 | 15.99  | 0        | 1 |
| 6064  | 17219208 | NM_001081275 // 1700009P17Rik // RIKEN cDNA 1700009P17 gene // 1 H3 1 // 75472 /// XM_0 | 1700009P17Rik | NM_001081275      | <b>2.38</b> | 2.38 | 2.58   | 0        | 1 |
| 31750 | 17472443 | NM_130861 // Slco1a5 // solute carrier organic anion transporter family, member 1a5 //  | Slco1a5       | NM_130861         | <b>2.37</b> | 2.37 | 1.00   | 0        | 1 |
| 656   | 17201311 | ---                                                                                     | ---           | ---               | <b>2.37</b> | 2.37 | 5.32   | 0        | 1 |
| 30298 | 17459248 | NM_134165 // Vmn1r37 // vomeronasal 1 receptor 37 // 6 C1 6 // 171183 /// ENSMUST000000 | Vmn1r37       | NM_134165         | <b>2.37</b> | 2.37 | 1.88   | 0        | 1 |
| 19841 | 17353405 | ENSMUST00000157876 // Gm22788 // predicted gene, 22788 // --- // ---                    | Gm22788       | VSMUST000001578:  | <b>2.37</b> | 2.37 | 2.18   | 2.13E-14 | 1 |
| 3607  | 17207331 | ---                                                                                     | ---           | ---               | <b>2.37</b> | 2.37 | 3.32   | 2.84E-14 | 1 |
| 35473 | 17507834 | ENSMUST00000066416 // Defb38 // defensin beta 38 // 8 A1.3 8 // 360212 /// AJ575424 //  | Defb38        | VSMUST000000664:  | <b>2.37</b> | 2.37 | 1.06   | 1.07E-14 | 1 |
| 2735  | 17205539 | ---                                                                                     | ---           | ---               | <b>2.37</b> | 2.37 | 9.54   | 1.42E-14 | 1 |
| 4304  | 17208745 | ---                                                                                     | ---           | ---               | <b>2.37</b> | 2.37 | 2.67   | 1.71E-13 | 1 |
| 17416 | 17329631 | NM_028973 // Lrrc15 // leucine rich repeat containing 15 // 16 B2 16 // 74488 /// ENSMU | Lrrc15        | NM_028973         | <b>2.36</b> | 2.36 | 10.26  | 5.68E-14 | 1 |
| 2509  | 17205079 | ---                                                                                     | ---           | ---               | <b>2.36</b> | 2.36 | 2.34   | 0        | 1 |
| 4561  | 17209269 | ---                                                                                     | ---           | ---               | <b>2.36</b> | 2.36 | 2.34   | 0        | 1 |
| 2610  | 17205285 | ---                                                                                     | ---           | ---               | <b>2.36</b> | 2.36 | 1.15   | 0        | 1 |
| 4662  | 17209475 | ---                                                                                     | ---           | ---               | <b>2.36</b> | 2.36 | 1.15   | 0        | 1 |
| 22037 | 17374174 | XM_006499567 // Olfr1280 // olfactory receptor 1280 // 2 E3 2 // 258910 /// BC119051 // | Olfr1280      | XM_006499567      | <b>2.36</b> | 2.36 | 1.63   | 0        | 1 |
| 3875  | 17207873 | ---                                                                                     | ---           | ---               | <b>2.36</b> | 2.36 | 3.02   | 0        | 1 |
| 19626 | 17351224 | ---                                                                                     | ---           | ---               | <b>2.35</b> | 2.35 | 2.34   | 5.68E-14 | 1 |
| 25663 | 17411163 | ENSMUST00000029670 // Ptgr // prostaglandin F receptor // 3 H3 3 76.96 cM // 19220 ///  | Ptgr          | VSMUST000000296:  | <b>2.35</b> | 2.35 | 24.73  | 2.84E-13 | 1 |
| 10105 | 17259831 | NM_001159284 // Smtn // smoothelin // 11 11 A2-A3 // 29856 /// NM_001284427 // Smtn //  | Smtn          | NM_001159284      | <b>2.35</b> | 2.35 | 14.33  | 2.84E-13 | 1 |
| 5133  | 17210429 | ---                                                                                     | ---           | ---               | <b>2.35</b> | 2.35 | 1.67   | 0        | 1 |
| 31068 | 17466421 | NM_001011528 // Olfr456 // olfactory receptor 456 // 6 B2.1 6 // 259144 /// BC139108 // | Olfr456       | NM_001011528      | <b>2.35</b> | 2.35 | 1.84   | 0        | 1 |
| 2008  | 17204067 | ---                                                                                     | ---           | ---               | <b>2.35</b> | 2.35 | 7.60   | 0        | 1 |
| 7504  | 17233792 | ---                                                                                     | ---           | ---               | <b>2.35</b> | 2.35 | 0.94   | 2.84E-14 | 1 |
| 40880 | 17549820 | ---                                                                                     | ---           | ---               | <b>2.35</b> | 2.35 | 4.72   | 0        | 1 |
| 18078 | 17336062 | XR_397419 // LOC102642015 // zinc finger protein 14-like // --- // 102642015            | LOC102642015  | XR_397419         | <b>2.35</b> | 2.35 | 1.00   | 5.68E-14 | 1 |
| 2244  | 17204543 | ---                                                                                     | ---           | ---               | <b>2.34</b> | 2.34 | 3.98   | 2.84E-14 | 1 |
| 29415 | 17449816 | ---                                                                                     | ---           | ---               | <b>2.34</b> | 2.34 | 1.14   | 0        | 1 |
| 30755 | 17463493 | NR_073569 // Klr1b-ps1 // killer cell lectin-like receptor subfamily B member 1, pseudo | Klr1b-ps1     | NR_073569         | <b>2.34</b> | 2.34 | 0.88   | 0        | 1 |
| 33808 | 17491714 | ENSMUST00000175256 // Gm23917 // predicted gene, 23917 // --- // ---                    | Gm23917       | VSMUST000001752:  | <b>2.34</b> | 2.34 | 0.80   | 0        | 1 |
| 32563 | 17480044 | ENSMUST00000032858 // 1700019G06Rik // RIKEN cDNA 1700019G06 gene // --- // --- /// ENS | 1700019G06Rik | VSMUST000000328:  | <b>2.34</b> | 2.34 | 15.92  | 1.71E-13 | 1 |
| 38400 | 17537088 | NM_008828 // Ppk1 // phosphoglycerate kinase 1 // X C-D X 47.36 cM // 18655 /// ENSMUST | Ppk1          | NM_008828         | <b>2.34</b> | 2.34 | 4.84   | 1.14E-13 | 1 |
| 2294  | 17204645 | ---                                                                                     | ---           | ---               | <b>2.33</b> | 2.33 | 2.50   | 5.68E-14 | 1 |
| 8254  | 17240621 | NM_172393 // Aim1 // absent in melanoma 1 // 10 B2 10 23.14 cM // 11630 /// ENSMUST0000 | Aim1          | NM_172393         | <b>2.33</b> | 2.33 | 2.81   | 0        | 1 |
| 4745  | 17209641 | ---                                                                                     | ---           | ---               | <b>2.33</b> | 2.33 | 10.26  | 2.84E-14 | 1 |
| 5436  | 17211850 | NM_009942 // Cox5b // cytochrome c oxidase subunit Vb // 1 B 1 // 12859 /// ENSMUST0000 | Cox5b         | NM_009942         | <b>2.33</b> | 2.33 | 1.24   | 5.68E-14 | 1 |
| 271   | 17200533 | ---                                                                                     | ---           | ---               | <b>2.32</b> | 2.32 | 1.40   | 0        | 1 |
| 5025  | 17210207 | ---                                                                                     | ---           | ---               | <b>2.32</b> | 2.32 | 3.22   | 0        | 1 |
| 9331  | 17251677 | NM_026991 // Sat2 // spermidine/spermine N1-acetyl transferase 2 // 11 11 B4 // 69215 / | Sat2          | NM_026991         | <b>2.32</b> | 2.32 | 6.21   | 1.99E-13 | 1 |
| 998   | 17202007 | ---                                                                                     | ---           | ---               | <b>2.32</b> | 2.32 | 1.98   |          |   |

|       |          |                                                                                           |           |                  |  |             |      |        |          |   |
|-------|----------|-------------------------------------------------------------------------------------------|-----------|------------------|--|-------------|------|--------|----------|---|
| 2503  | 17205067 | ---                                                                                       |           | ---              |  | <b>2.32</b> | 2.32 | 1.14   | 2.84E-14 | 1 |
| 4555  | 17209257 | ---                                                                                       |           | ---              |  | <b>2.32</b> | 2.32 | 1.14   | 2.84E-14 | 1 |
| 8518  | 17243493 | ENSMUST00000065815 // Glt8d2 // glycosyltransferase 8 domain containing 2 // 10 C1 10 /   | Glt8d2    | VSMUST0000006581 |  | <b>2.32</b> | 2.32 | 10.91  | 0        | 1 |
| 32741 | 17481556 | NM_001163557 // Ppfpb2 // PTPRF interacting protein, binding protein 2 (liprin beta 2)    | Ppfpb2    | NM_001163557     |  | <b>2.32</b> | 2.32 | 0.97   | 5.68E-14 | 1 |
| 3543  | 17207189 | ---                                                                                       |           | ---              |  | <b>2.32</b> | 2.32 | 1.64   | 0        | 1 |
| 32399 | 17478195 | NM_011314 // Saa2 // serum amyloid A 2 // 7 B4 7 30.56 cM // 20209 /// ENSMUST000000759   | Saa2      | NM_011314        |  | <b>2.32</b> | 2.32 | 1.55   | 0        | 1 |
| 17540 | 17330861 | ENSMUST00000080694 // Gm5407 // predicted gene 5407 // --- // ---                         | Gm5407    | VSMUST0000008069 |  | <b>2.32</b> | 2.32 | 1.10   | 2.84E-14 | 1 |
| 5187  | 17210539 | ---                                                                                       |           | ---              |  | <b>2.32</b> | 2.32 | 1.66   | 0        | 1 |
| 5317  | 17210805 | ---                                                                                       |           | ---              |  | <b>2.31</b> | 2.31 | 5.24   | 5.68E-14 | 1 |
| 3029  | 17206139 | ---                                                                                       |           | ---              |  | <b>2.31</b> | 2.31 | 1.22   | 0        | 1 |
| 15348 | 17308456 | ---                                                                                       |           | ---              |  | <b>2.31</b> | 2.31 | 1.39   | 5.68E-14 | 1 |
| 30910 | 17464706 | NM_010056 // Dlx5 // distal-less homeobox 5 // 6 A1 6 2.83 cM // 13395 /// NM_198854 //   | Dlx5      | NM_010056        |  | <b>2.31</b> | 2.31 | 38.34  | 2.27E-13 | 1 |
| 30316 | 17459324 | ENSMUST00000103317 // Igkv1-117 // immunoglobulin kappa variable 1-117 // 6 C1 6 31.07    | Igkv1-117 | VSMUST0000010331 |  | <b>2.31</b> | 2.31 | 152.55 | 1.14E-13 | 1 |
| 19939 | 17354359 | ENSMUST00000082886 // Gm25739 // predicted gene, 25739 // --- // ---                      | Gm25739   | VSMUST0000008288 |  | <b>2.31</b> | 2.31 | 1.27   | 2.84E-14 | 1 |
| 3549  | 17207201 | ---                                                                                       |           | ---              |  | <b>2.31</b> | 2.31 | 4.21   | 0        | 1 |
| 13399 | 17290938 | ---                                                                                       |           | ---              |  | <b>2.30</b> | 2.30 | 2.40   | 0        | 1 |
| 18772 | 17342642 | NM_013642 // Dusp1 // dual specificity phosphatase 1 // 17 A2-C 17 13.28 cM // 19252 //   | Dusp1     | NM_013642        |  | <b>2.30</b> | 2.30 | 1.18   | 0        | 1 |
| 18180 | 17337118 | ENSMUST00000172979 // H2-Q5 // histocompatibility 2, Q region locus 5 // 17 B1 17 19.17   | H2-Q5     | VSMUST0000017297 |  | <b>2.30</b> | 2.30 | 12.06  | 0        | 1 |
| 24143 | 17396056 | NM_001272097 // Fabp5 // fatty acid binding protein 5, epidermal // 3 A1-A3 3 // 16592    | Fabp5     | NM_001272097     |  | <b>2.30</b> | 2.30 | 15.90  | 0        | 1 |
| 5129  | 17210421 | ---                                                                                       |           | ---              |  | <b>2.30</b> | 2.30 | 3.60   | 2.84E-14 | 1 |
| 4870  | 17209893 | ---                                                                                       |           | ---              |  | <b>2.30</b> | 2.30 | 8.82   | 2.84E-14 | 1 |
| 3829  | 17207781 | ---                                                                                       |           | ---              |  | <b>2.30</b> | 2.30 | 1.91   | 5.68E-14 | 1 |
| 1647  | 17203323 | ---                                                                                       |           | ---              |  | <b>2.30</b> | 2.30 | 1.62   | 0        | 1 |
| 32572 | 17480190 | ENSMUST00000158646 // Gm24552 // predicted gene, 24552 // --- // ---                      | Gm24552   | VSMUST0000015864 |  | <b>2.30</b> | 2.30 | 0.82   | 1.42E-14 | 1 |
| 5917  | 17217596 | NM_053106 // Lmod1 // leiomodoin 1 (smooth muscle) // 1 F1 1 // 93689 /// ENSMUST00000059 | Lmod1     | NM_053106        |  | <b>2.30</b> | 2.30 | 4.60   | 2.27E-13 | 1 |
| 3711  | 17207543 | ---                                                                                       |           | ---              |  | <b>2.30</b> | 2.30 | 1.99   | 4.97E-14 | 1 |
| 23160 | 17387131 | NM_001025576 // Ccdc141 // coiled-coil domain containing 141 // 2 C3 2 // 545428 /// EN   | Ccdc141   | NM_001025576     |  | <b>2.30</b> | 2.30 | 3.27   | 2.27E-13 | 1 |
| 2169  | 17204389 | ---                                                                                       |           | ---              |  | <b>2.29</b> | 2.29 | 1.98   | 1.14E-13 | 1 |
| 19839 | 17353370 | NM_001109989 // Nrep // neuronal regeneration related protein // 18 B1 18 // 27528 //     | Nrep      | NM_001109989     |  | <b>2.29</b> | 2.29 | 8.44   | 0        | 1 |
| 25797 | 17412636 | ENSMUST00000158789 // Gm22010 // predicted gene, 22010 // --- // ---                      | Gm22010   | VSMUST0000015878 |  | <b>2.29</b> | 2.29 | 4.59   | 0        | 1 |
| 16961 | 17325159 | AK162008 // Mylk // myosin, light polypeptide kinase // 16 B3 16 // 107589 /// AY237726   | Mylk      | AK162008         |  | <b>2.28</b> | 2.28 | 6.78   | 1.71E-13 | 1 |
| 3750  | 17207621 | ---                                                                                       |           | ---              |  | <b>2.28</b> | 2.28 | 3.71   | 2.84E-14 | 1 |
| 3702  | 17207525 | ---                                                                                       |           | ---              |  | <b>2.28</b> | 2.28 | 1.26   | 8.53E-14 | 1 |
| 29505 | 17450904 | NM_001104625 // Vmn2r14 // vomeronasal 2, receptor 14 // 5 F1 5 // 231591 /// ENSMUST000  | Vmn2r14   | NM_001104625     |  | <b>2.28</b> | 2.28 | 1.10   | 1.07E-14 | 1 |
| 38403 | 17537118 | NM_172435 // P2ry10 // purinergic receptor P2Y, G-protein coupled 10 // X D X // 78826    | P2ry10    | NM_172435        |  | <b>2.28</b> | 2.28 | 43.23  | 0        | 1 |
| 17598 | 17331266 | NM_146994 // Olfr201 // olfactory receptor 201 // 16 C2 16 // 258996 /// ENSMUST0000009   | Olfr201   | NM_146994        |  | <b>2.28</b> | 2.28 | 0.99   | 0        | 1 |
| 12603 | 17284498 | ENSMUST00000103492 // Ighv10-1 // immunoglobulin heavy variable 10-1 // --- // ---        | Ighv10-1  | VSMUST0000010349 |  | <b>2.28</b> | 2.28 | 133.01 | 5.68E-14 | 1 |
| 583   | 17201163 | ---                                                                                       |           | ---              |  | <b>2.28</b> | 2.28 | 2.10   | 1.42E-14 | 1 |
| 36639 | 17518809 | NR_045748 // Gm19299 // predicted gene, 19299 // 9 9 36.34 cM // 100502636                | Gm19299   | NR_045748        |  | <b>2.28</b> | 2.28 | 5.80   | 0        | 1 |
| 28586 | 17441759 | NR_003507 // Oas1b // 2-5 oligoadenylate synthetase 1B // 5 F1 5 60.64 cM // 23961 /// E  | Oas1b     | NR_003507        |  | <b>2.28</b> | 2.28 | 4.39   | 0        | 1 |
| 3285  | 17206665 | ---                                                                                       |           | ---              |  | <b>2.28</b> | 2.28 | 3.59   | 0        | 1 |
| 2251  | 17204557 | ---                                                                                       |           | ---              |  | <b>2.27</b> | 2.27 | 3.08   | 2.84E-14 | 1 |
| 184   | 17200357 | ---                                                                                       |           | ---              |  | <b>2.27</b> | 2.27 | 3.74   | 0        | 1 |
| 24401 | 17398721 | ENSMUST00000082938 // Gm23376 // predicted gene, 23376 // --- // ---                      | Gm23376   | VSMUST0000008293 |  | <b>2.27</b> | 2.27 | 0.88   | 0        | 1 |
| 32599 | 17480485 | NM_001113379 // Lrrc32 // leucine rich repeat containing 32 // 7 E2 7 53.86 cM // 43421   | Lrrc32    | NM_001113379     |  | <b>2.27</b> | 2.27 | 0.77   | 5.68E-14 | 1 |
| 12358 | 17282743 | NM_009368 // Tgfb3 // transforming growth factor, beta 3 // 12 D2 12 40.09 cM // 21809    | Tgfb3     | NM_009368        |  | <b>2.27</b> | 2.27 | 18.53  | 0        | 1 |
| 27281 | 17427476 | NM_172872 // Kank4 // KN motif and ankyrin repeat domains 4 // 4 C6 4 // 242553 /// ENS   | Kank4     | NM_172872        |  | <b>2.27</b> | 2.27 | 1.24   | 1.14E-13 | 1 |
| 1211  | 17202439 | ---                                                                                       |           | ---              |  | <b>2.26</b> | 2.26 | 10.65  | 5.68E-14 | 1 |
| 317   | 17200625 | ---                                                                                       |           | ---              |  | <b>2.26</b> | 2.26 | 0.96   | 0        | 1 |
| 3917  | 17207959 | ---                                                                                       |           | ---              |  | <b>2.26</b> | 2.26 | 1.04   | 0        | 1 |
| 38733 | 17539536 | NM_010216 // Figf // c-fos induced growth factor // X F5 X 76.35 cM // 14205 /// XM_006   | Figf      | NM_010216        |  | <b>2.26</b> | 2.26 | 15.03  | 1.71E-13 | 1 |
| 4962  | 17210079 | ---                                                                                       |           | ---              |  | <b>2.26</b> | 2.26 | 4.36   | 1.42E-14 | 1 |
| 20591 | 17359966 | ---                                                                                       |           | ---              |  | <b>2.26</b> | 2.26 | 1.54   | 0        | 1 |
| 3479  | 17207061 | ---                                                                                       |           | ---              |  | <b>2.26</b> | 2.26 | 1.03   | 0        | 1 |
| 34370 | 17496547 | NM_001102563 // Prrt2 // proline-rich transmembrane protein 2 // 7 F3 7 // 69017 /// EN   | Prrt2     | NM_001102563     |  | <b>2.26</b> | 2.26 | 1.42   | 0        | 1 |
| 1108  | 17202231 | ---                                                                                       |           | ---              |  | <b>2.26</b> | 2.26 | 1.59   | 1.42E-14 | 1 |
| 27198 | 17426884 | ENSMUST00000082775 // Gm22509 // predicted gene, 22509 // --- // --- /// ENSMUST0000008   | Gm22509   | VSMUST0000008275 |  | <b>2.26</b> | 2.26 | 2.01   | 0        | 1 |
| 4307  | 17208751 | ---                                                                                       |           | ---              |  | <b>2.25</b> | 2.25 | 1.27   | 0        | 1 |
| 766   | 17201535 | ---                                                                                       |           | ---              |  | <b>2.25</b> | 2.25 | 0.79   | 0        | 1 |
| 17030 | 17325904 | NM_026439 // Ccdc80 // coiled-coil domain containing 80 // 16 16 B5 // 67896 /// ENSMUS   | Ccdc80    | NM_026439        |  | <b>2.25</b> | 2.25 | 14.43  | 8.53E-14 | 1 |
| 23188 | 17387512 | NR_029544 // Mir130a // microRNA 130a // 2 2 // 387149 /// ENSMUST00000083550 // Mir130   | Mir130a   | NR_029544        |  | <b>2.25</b> | 2.25 | 5.72   | 0        | 1 |
| 38532 | 17538186 | ENSMUST00000158812 // Gm23199 // predicted gene, 23199 // --- // ---                      | Gm23199   | VSMUST0000015881 |  | <b>2.25</b> | 2.25 | 2.31   | 0        | 1 |
| 20542 | 17359816 | NM_178929 // Kazald1 // Kazal-type serine peptidase inhibitor domain 1 // 19 C3 19 // 1   | Kazald1   | NM_178929        |  | <b>2.25</b> | 2.25 | 5.07   | 0        | 1 |
| 5147  | 17210457 | ---                                                                                       |           | ---              |  | <b>2.25</b> | 2.25 | 1.06   | 2.84E-14 | 1 |
| 1946  | 17203939 | ---                                                                                       |           | ---              |  | <b>2.25</b> | 2.25 | 2.29   | 0        | 1 |
| 36500 | 17517282 | ENSMUST00000175224 // Gm22242 // predicted gene, 22242 // --- // ---                      | Gm22242   | VSMUST0000017522 |  | <b>2.25</b> | 2.25 | 1.12   | 0        | 1 |
| 27242 | 17427162 | ENSMUST00000178089 // Gm25244 // predicted gene, 25244 // --- // ---                      | Gm25244   | VSMUST0000017808 |  | <b>2.25</b> | 2.25 | 2.01   | 1.71E-13 | 1 |
| 1094  | 17202203 | ---                                                                                       |           | ---              |  | <b>2.25</b> | 2.25 | 1.08   | 1.42E-14 | 1 |
| 30015 | 17456841 | NM_029742 // Klhdc10 // kelch domain containing 10 // 6 6 A3 // 76788 /// ENSMUST000000   | Klhdc10   | NM_029742        |  | <b>2.25</b> | 2.25 | 6.68   | 0        | 1 |
| 28321 | 17438969 | NM_019932 // Pf4 // platelet factor 4 // 5 E1 5 // 56744 /// ENSMUST00000031320 // Pf4    | Pf4       | NM_019932        |  | <b>2.25</b> | 2.25 | 3.08   | 5.68E-14 | 1 |
| 13429 | 17291057 | NM_178186 // Hist1h2ag // histone cluster 1, H2ag // 13 A2-A3 13 // 319167 /// ENSMUST0   | Hist1h2ag | NM_178186        |  | <b>2.25</b> | 2.25 | 3.39   | 5.68E-14 | 1 |
| 19981 | 17354791 | NR_029557 // Mir145a // microRNA 145a // 18 18 // 387163 /// ENSMUST00000083658 // Mir1   | Mir145a   | NR_029557        |  | <b>2.25</b> | 2.25 | 37.99  | 5.68E-14 | 1 |
| 16071 | 17315860 | NM_148938 // Slc1a3 // solute carrier family 1 (glial high affinity glutamate transport   | Slc1a3    | NM_148938        |  | <b>2.25</b> | 2.25 | 21.20  | 5.68E-14 | 1 |
| 21009 | 17364474 | NM_016861 // Pdlim1 // PDZ and LIM domain 1 (elfin) // 19 19 D1 // 54132 /// ENSMUST000   | Pdlim1    | NM_016861        |  | <b>2.25</b> | 2.25 | 0.94   | 0        | 1 |
| 16644 | 17322219 | NM_130458 // Sp7 // Sp7 transcription factor 7 // 15 F3 15 // 170574 /// ENSMUST0000007   | Sp7       | NM_130458        |  | <b>2.24</b> | 2.24 | 6.30   | 0        | 1 |
| 11180 | 17270848 | NM_133199 // Scn4a // sodium channel, voltage-gated, type IV, alpha // 11 E1 11 68.91 c   | Scn4a     | NM_133199        |  | <b>2.24</b> | 2.24 | 0.90   | 1.42E-13 | 1 |
| 19592 | 17350853 | ENSMUST00000181838 // Gm26507 // predicted gene, 26507 // --- // ---                      | Gm26507   | VSMUST0000018183 |  | <b>2.24</b> | 2.24 | 1.57   | 0        | 1 |
| 16376 | 17319091 | NM_025622 // Lgals2 // lectin, galactose-binding, soluble 2 // 15 E1 15 // 107753 /// E   | Lgals2    | NM_025622        |  | <b>2.24</b> | 2.24 | 7.83   | 0        | 1 |
| 11546 | 17275301 | ENSMUST00000082866 // Gm24948 // predicted gene, 24948 // --- // ---                      | Gm24948   | VSMUST0000008286 |  | <b>2.24</b> | 2.24 | 0.81   | 0        | 1 |
| 18642 | 17341477 | ENSMUST00000171996 // Vmn2r117 // vomeronasal 2, receptor 117 // 17 A3.3 17 // 619788 /   | Vmn2r117  | VSMUST0000017199 |  | <b>2.24</b> | 2.24 | 1.06   | 2.84E-14 | 1 |
| 18095 | 17336228 | NM_001025313 // Tapbp // TAP binding protein // 17 B1 17 17.98 cM // 21356 /// NM_00931   | Tapbp     | NM_001025313     |  | <b>2.24</b> | 2.24 | 0.83   | 2.27E-13 | 1 |
| 7430  | 17233317 | ENSMUST00000157697 // Gm25664 // predicted gene, 25664 // --- // ---                      | Gm25664   | VSMUST0000015769 |  | <b>2.23</b> | 2.23 | 0.89   | 3.55E-14 | 1 |
| 2536  | 17205133 | ---                                                                                       |           | ---              |  | <b>2.23</b> | 2.23 | 1.13   | 0        | 1 |
| 4588  | 17209323 | ---                                                                                       |           | ---              |  | <b>2.23</b> | 2.23 | 1.13   | 0        | 1 |
| 29263 | 17448811 | ---                                                                                       |           | ---              |  | <b>2.23</b> | 2.23 | 3.92   | 0        | 1 |
| 3625  | 17207367 | ---                                                                                       |           | ---              |  | <b>2.23</b> | 2.23 | 2.37   | 4.26E-14 | 1 |
| 1905  | 17203855 | ---                                                                                       |           | ---              |  | <b>2.23</b> | 2.23 | 3.18   | 0        | 1 |
| 38969 | 17541715 | NR_030498 // Mir450b // microRNA 450b // X X // 751532 /// ENSMUST00000102095 // Mir450   | Mir450b   | NR_030498        |  | <b>2.23</b> | 2.23 | 8.79   | 2.13E-14 | 1 |
| 20130 | 17356322 | ---                                                                                       |           | ---              |  | <b>2.23</b> | 2.23 | 0.74   | 2.84E-14 | 1 |
| 3152  | 17206387 | ---                                                                                       |           | ---              |  | <b>2.23</b> | 2.23 | 1.25   | 1.42E-13 | 1 |
| 8933  | 17247944 | NR_029797 // Mir216a // microRNA 216a // 11 11 // 387212 /// ENSMUST00000083605 // Mir2   | Mir216a   | NR_029797        |  | <b>2.23</b> | 2.23 | 0.82   | 0        | 1 |
| 4357  | 17208851 | ---                                                                                       |           | ---              |  | <b>2.23</b> | 2.23 | 0.75   | 0        | 1 |
| 4047  | 17208225 | ---                                                                                       |           | ---              |  | <b>2.22</b> | 2.22 | 1.60   | 1.71E-13 | 1 |
| 27086 | 17425399 | ENSMUST00000104447 // Gm22150 // predicted gene, 22150 // --- // ---                      | Gm22150   | VSMUST0000010444 |  | <b>2.22</b> | 2.22 | 0.98   | 0        | 1 |
| 14738 | 17302429 | NM_201529 // Lmo7 // LIM domain only 7 // 14 E2.3 14 50.9 cM // 380928 /// XM_006519180   | Lmo7      | NM_201529        |  | <b>2.22</b> | 2.22 | 19.96  | 2.27E-13 | 1 |

|       |          |                                                                                           |           |                  |      |      |      |        |          |   |
|-------|----------|-------------------------------------------------------------------------------------------|-----------|------------------|------|------|------|--------|----------|---|
| 1393  | 17202807 | ---                                                                                       |           |                  | ---  | 2.22 | 2.22 | 4.94   | 1.71E-13 | 1 |
| 23799 | 17392785 | ENSMUST00000157808 // Gm24199 // predicted gene, 24199 // --- // ---                      | Gm24199   | VSMUST0000015780 | 2.22 | 2.22 | 2.22 | 1.65   | 0        | 1 |
| 1222  | 17202461 | ---                                                                                       |           | ---              | 2.22 | 2.22 | 2.22 | 4.54   | 2.84E-14 | 1 |
| 36119 | 17514135 | NM_053207 // EglN1 // egl-9 family hypoxia-inducible factor 1 // 8 E2 8 // 112405 // // E | EglN1     | NM_053207        | 2.22 | 2.22 | 2.22 | 2.75   | 0        | 1 |
| 35458 | 17507691 | ENSMUST00000157686 // Gm26184 // predicted gene, 26184 // --- // ---                      | Gm26184   | VSMUST0000015768 | 2.22 | 2.22 | 2.22 | 1.38   | 7.11E-15 | 1 |
| 6794  | 17226591 | ENSMUST00000157807 // Gm25384 // predicted gene, 25384 // --- // ---                      | Gm25384   | VSMUST0000015780 | 2.22 | 2.22 | 2.22 | 2.25   | 0        | 1 |
| 2864  | 17205803 | ---                                                                                       |           | ---              | 2.22 | 2.22 | 2.22 | 2.02   | 0        | 1 |
| 12498 | 17283944 | ---                                                                                       |           | ---              | 2.22 | 2.22 | 2.22 | 1.07   | 0        | 1 |
| 554   | 17201105 | ---                                                                                       |           | ---              | 2.22 | 2.22 | 2.22 | 3.40   | 1.71E-13 | 1 |
| 38302 | 17536206 | ENSMUST00000083813 // Gm25006 // predicted gene, 25006 // --- // ---                      | Gm25006   | VSMUST000000838: | 2.22 | 2.22 | 2.22 | 1.97   | 0        | 1 |
| 16573 | 17321474 | NM_011653 // Tuba1a // tubulin, alpha 1A // 15 F1 15 55.29 cM // 22142 // ENSMUST000000   | Tuba1a    | NM_011653        | 2.22 | 2.22 | 2.22 | 6.63   | 2.27E-13 | 1 |
| 29970 | 17456304 | ENSMUST00000083768 // Gm22828 // predicted gene, 22828 // --- // ---                      | Gm22828   | VSMUST0000008376 | 2.21 | 2.21 | 2.21 | 1.04   | 0        | 1 |
| 27958 | 17434675 | ENSMUST00000170260 // Gm8879 // predicted gene 8879 // --- // ---                         | Gm8879    | VSMUST0000017026 | 2.21 | 2.21 | 2.21 | 2.05   | 7.11E-14 | 1 |
| 5040  | 17210239 | ---                                                                                       |           | ---              | 2.21 | 2.21 | 2.21 | 3.71   | 2.84E-14 | 1 |
| 12590 | 17284460 | ENSMUST00000103473 // LOC544905 // Ig heavy chain V region // 12 F2 12 // 544905          | LOC544905 | VSMUST000001034: | 2.21 | 2.21 | 2.21 | 145.13 | 1.14E-13 | 1 |
| 14629 | 17301452 | AF248058 // Clu // clusterin // 14 D1 14 34.36 cM // 12759 // // L08235 // Clu // cluster | Clu       | AF248058         | 2.21 | 2.21 | 2.21 | 0.79   | 0        | 1 |
| 290   | 17200571 | ---                                                                                       |           | ---              | 2.21 | 2.21 | 2.21 | 1.21   | 1.14E-13 | 1 |
| 28848 | 17444961 | NM_009663 // Alox5ap // arachidonate 5-lipoxygenase activating protein // 5 G3 5 // 116   | Alox5ap   | NM_009663        | 2.20 | 2.20 | 2.20 | 4.60   | 0        | 1 |
| 20673 | 17360912 | ENSMUST00000092094 // Gm6020 // predicted gene 6020 // --- // --- // AB010317 // Gm602    | Gm6020    | VSMUST000000920: | 2.20 | 2.20 | 2.20 | 27.38  | 2.84E-14 | 1 |
| 2064  | 17204179 | ---                                                                                       |           | ---              | 2.20 | 2.20 | 2.20 | 3.62   | 2.84E-14 | 1 |
| 20584 | 17359958 | ---                                                                                       |           | ---              | 2.20 | 2.20 | 2.20 | 1.76   | 0        | 1 |
| 18894 | 17343789 | XM_006537281 // PsmB9 // proteasome (prosome, macropain) subunit, beta type 9 (large mu   | PsmB9     | XM_006537281     | 2.20 | 2.20 | 2.20 | 4.72   | 0        | 1 |
| 23456 | 17389269 | NM_146907 // Olfr1282 // olfactory receptor 1282 // 2 E3 2 // 258909 // ENSMUST0000009    | Olfr1282  | NM_146907        | 2.20 | 2.20 | 2.20 | 1.80   | 0        | 1 |
| 41022 | 17550302 | ---                                                                                       |           | ---              | 2.20 | 2.20 | 2.20 | 1.12   | 2.84E-14 | 1 |
| 11448 | 17274344 | ---                                                                                       |           | ---              | 2.20 | 2.20 | 2.20 | 1.91   | 1.14E-13 | 1 |
| 34625 | 17499212 | NM_010172 // F7 // coagulation factor VII // 8 A1.1 8 5.73 cM // 14068 // ENSMUST000000   | F7        | NM_010172        | 2.20 | 2.20 | 2.20 | 1.12   | 2.84E-14 | 1 |
| 29545 | 17451431 | ENSMUST00000067853 // Tmem119 // transmembrane protein 119 // 5 F 5 // 231633 // NM_14    | Tmem119   | VSMUST000000678: | 2.20 | 2.20 | 2.20 | 3.67   | 1.71E-13 | 1 |
| 4103  | 17208339 | ---                                                                                       |           | ---              | 2.20 | 2.20 | 2.20 | 2.11   | 0        | 1 |
| 5919  | 17217610 | NM_007791 // Csrp1 // cysteine and glycine-rich protein 1 // 1 E4 1 // 13007 // ENSMUS    | Csrp1     | NM_007791        | 2.20 | 2.20 | 2.20 | 2.86   | 0        | 1 |
| 12157 | 17280804 | ---                                                                                       |           | ---              | 2.20 | 2.20 | 2.20 | 1.41   | 0        | 1 |
| 39245 | 17544271 | ENSMUST00000158845 // Gm25366 // predicted gene, 25366 // --- // ---                      | Gm25366   | VSMUST000001588: | 2.20 | 2.20 | 2.20 | 1.52   | 0        | 1 |
| 19024 | 17344943 | NM_009639 // Crisp3 // cysteine-rich secretory protein 3 // 17 B2 17 19.45 cM // 11572    | Crisp3    | NM_009639        | 2.20 | 2.20 | 2.20 | 5.35   | 0        | 1 |
| 19484 | 17349898 | NM_053135 // Pcdhb10 // protocadherin beta 10 // 18 B3 18 // 93881 // ENSMUST000000511    | Pcdhb10   | NM_053135        | 2.19 | 2.19 | 2.19 | 1.86   | 0        | 1 |
| 26056 | 17415010 | ENSMUST00000158784 // Gm24884 // predicted gene, 24884 // --- // ---                      | Gm24884   | VSMUST000001587: | 2.19 | 2.19 | 2.19 | 0.79   | 2.84E-14 | 1 |
| 21590 | 17370209 | NM_001206367 // Gsn // gelsolin // 2 B 2 23.5 cM // 227753 // NM_001206369 // Gsn // g    | Gsn       | NM_001206367     | 2.19 | 2.19 | 2.19 | 5.50   | 0        | 1 |
| 19826 | 17353256 | ENSMUST00000165131 // Gm6665 // predicted gene 6665 // --- // ---                         | Gm6665    | VSMUST000001651: | 2.19 | 2.19 | 2.19 | 19.94  | 5.68E-14 | 1 |
| 2165  | 17204381 | ---                                                                                       |           | ---              | 2.19 | 2.19 | 2.19 | 2.32   | 0        | 1 |
| 20383 | 17358138 | NM_001033759 // Tmem2 // transmembrane protein 2 // 19 B 19 // 83921 // NM_031997 // T    | Tmem2     | NM_001033759     | 2.19 | 2.19 | 2.19 | 13.75  | 0        | 1 |
| 13102 | 17288338 | NM_028402 // Zfp493 // zinc finger protein 493 // 13 B3 13 // 72958 // ENSMUST00000164    | Zfp493    | NM_028402        | 2.19 | 2.19 | 2.19 | 0.87   | 0        | 1 |
| 12    | 17200009 | ---                                                                                       |           | ---              | 2.19 | 2.19 | 2.19 | 1.76   | 0        | 1 |
| 23210 | 17387626 | ENSMUST00000082871 // Gm24037 // predicted gene, 24037 // --- // ---                      | Gm24037   | VSMUST000000828: | 2.19 | 2.19 | 2.19 | 0.89   | 0        | 1 |
| 15540 | 17310259 | NM_001253782 // Prlr // prolactin receptor // 15 A1 15 5.23 cM // 19116 // NM_011169 /    | Prlr      | NM_001253782     | 2.19 | 2.19 | 2.19 | 0.73   | 2.84E-14 | 1 |
| 901   | 17201809 | ---                                                                                       |           | ---              | 2.19 | 2.19 | 2.19 | 0.93   | 1.71E-13 | 1 |
| 987   | 17201985 | ---                                                                                       |           | ---              | 2.19 | 2.19 | 2.19 | 0.93   | 1.71E-13 | 1 |
| 24783 | 17402539 | ENSMUST00000083314 // Gm22293 // predicted gene, 22293 // --- // ---                      | Gm22293   | VSMUST000000833: | 2.19 | 2.19 | 2.19 | 1.64   | 0        | 1 |
| 33071 | 17485462 | ENSMUST00000033386 // Mrgprf // MAS-related GPR, member F // 7 F5 7 // 211577 // ENSMU    | Mrgprf    | VSMUST000000333: | 2.19 | 2.19 | 2.19 | 1.33   | 2.27E-13 | 1 |
| 384   | 17200759 | ---                                                                                       |           | ---              | 2.18 | 2.18 | 2.18 | 2.45   | 0        | 1 |
| 8663  | 17245169 | ---                                                                                       |           | ---              | 2.18 | 2.18 | 2.18 | 0.77   | 0        | 1 |
| 32580 | 17480237 | ---                                                                                       |           | ---              | 2.18 | 2.18 | 2.18 | 2.03   | 0        | 1 |
| 21106 | 17365656 | ENSMUST00000083209 // Gm25644 // predicted gene, 25644 // --- // ---                      | Gm25644   | VSMUST000000832: | 2.18 | 2.18 | 2.18 | 1.44   | 0        | 1 |
| 14098 | 17297551 | NM_009502 // Vcl // vinculin // 14 A3 14 11.53 cM // 22330 // ENSMUST00000022369 // Vc    | Vcl       | NM_009502        | 2.18 | 2.18 | 2.18 | 11.93  | 0        | 1 |
| 31146 | 17467104 | ENSMUST00000104123 // Gm24709 // predicted gene, 24709 // --- // ---                      | Gm24709   | VSMUST000001041: | 2.18 | 2.18 | 2.18 | 0.70   | 7.11E-15 | 1 |
| 1370  | 17202761 | ---                                                                                       |           | ---              | 2.18 | 2.18 | 2.18 | 1.78   | 0        | 1 |
| 19336 | 17348435 | NM_001146287 // Cables1 // CDK5 and Abl enzyme substrate 1 // 18 18 A2 // 63955 // NM_    | Cables1   | NM_001146287     | 2.18 | 2.18 | 2.18 | 3.07   | 0        | 1 |
| 4825  | 17209803 | ---                                                                                       |           | ---              | 2.18 | 2.18 | 2.18 | 12.30  | 0        | 1 |
| 622   | 17201241 | ---                                                                                       |           | ---              | 2.18 | 2.18 | 2.18 | 1.42   | 0        | 1 |
| 36600 | 17518314 | ENSMUST00000082984 // Gm22571 // predicted gene, 22571 // --- // ---                      | Gm22571   | VSMUST000000829: | 2.18 | 2.18 | 2.18 | 4.33   | 1.14E-13 | 1 |
| 4939  | 17210033 | ---                                                                                       |           | ---              | 2.17 | 2.17 | 2.17 | 9.61   | 2.84E-14 | 1 |
| 6694  | 17225413 | NM_001243008 // Col6a3 // collagen, type VI, alpha 3 // 1 D 1 45.53 cM // 12835 // NM_    | Col6a3    | NM_001243008     | 2.17 | 2.17 | 2.17 | 33.93  | 0        | 1 |
| 23279 | 17387800 | NM_001011835 // Olfr1162 // olfactory receptor 1162 // 2 D 2 // 258105 // ENSMUST000000   | Olfr1162  | NM_001011835     | 2.17 | 2.17 | 2.17 | 2.00   | 5.68E-14 | 1 |
| 6840  | 17227089 | NM_007570 // Btg2 // B cell translocation gene 2, anti-proliferative // 1 E4 1 58.1 cM    | Btg2      | NM_007570        | 2.17 | 2.17 | 2.17 | 3.65   | 0        | 1 |
| 4155  | 17208445 | ---                                                                                       |           | ---              | 2.17 | 2.17 | 2.17 | 2.45   | 1.14E-13 | 1 |
| 28778 | 17444106 | NM_008494 // Lfng // LFNG O-fucosylpeptide 3-beta-N-acetylglucosaminyltransferase // 5    | Lfng      | NM_008494        | 2.17 | 2.17 | 2.17 | 9.94   | 0        | 1 |
| 2192  | 17204435 | ---                                                                                       |           | ---              | 2.17 | 2.17 | 2.17 | 9.18   | 5.68E-14 | 1 |
| 4219  | 17208575 | ---                                                                                       |           | ---              | 2.17 | 2.17 | 2.17 | 0.75   | 5.68E-14 | 1 |
| 704   | 17201409 | ---                                                                                       |           | ---              | 2.17 | 2.17 | 2.17 | 1.07   | 0        | 1 |
| 37482 | 17528214 | ENSMUST00000158711 // Gm24347 // predicted gene, 24347 // --- // ---                      | Gm24347   | VSMUST000001587: | 2.17 | 2.17 | 2.17 | 2.47   | 1.42E-14 | 1 |
| 3377  | 17206855 | ---                                                                                       |           | ---              | 2.17 | 2.17 | 2.17 | 2.28   | 0        | 1 |
| 38473 | 17537592 | NM_001083895 // Srpx2 // sushi-repeat-containing protein, X-linked 2 // X E3 X // 68792   | Srpx2     | NM_001083895     | 2.17 | 2.17 | 2.17 | 7.05   | 2.56E-13 | 1 |
| 7379  | 17232912 | NM_001013370 // Sesn1 // sestrin 1 // 10 B2 10 22.77 cM // 140742 // NM_001162908 // S    | Sesn1     | NM_001013370     | 2.17 | 2.17 | 2.17 | 0.90   | 0        | 1 |
| 37533 | 17528744 | ENSMUST00000158905 // Gm25163 // predicted gene, 25163 // --- // ---                      | Gm25163   | VSMUST000001589: | 2.17 | 2.17 | 2.17 | 1.34   | 0        | 1 |
| 29061 | 17447218 | NM_010753 // Mxd4 // Max dimerization protein 4 // 5 B2 5 17.84 cM // 17122 // ENSMUST    | Mxd4      | NM_010753        | 2.17 | 2.17 | 2.17 | 0.93   | 0        | 1 |
| 2574  | 17205213 | ---                                                                                       |           | ---              | 2.16 | 2.16 | 2.16 | 2.35   | 0        | 1 |
| 4626  | 17209403 | ---                                                                                       |           | ---              | 2.16 | 2.16 | 2.16 | 2.35   | 0        | 1 |
| 18874 | 17343679 | ---                                                                                       |           | ---              | 2.16 | 2.16 | 2.16 | 1.42   | 0        | 1 |
| 7253  | 17231682 | ENSMUST00000116869 // Gm22194 // predicted gene, 22194 // --- // ---                      | Gm22194   | VSMUST000001168: | 2.16 | 2.16 | 2.16 | 1.80   | 0        | 1 |
| 24298 | 17397708 | NM_001111052 // Dclk1 // doublecortin-like kinase 1 // 3 3 D // 13175 // NM_001111053     | Dclk1     | NM_001111052     | 2.16 | 2.16 | 2.16 | 16.28  | 1.14E-13 | 1 |
| 3011  | 17206101 | ---                                                                                       |           | ---              | 2.16 | 2.16 | 2.16 | 0.92   | 0        | 1 |
| 1029  | 17202069 | ---                                                                                       |           | ---              | 2.16 | 2.16 | 2.16 | 0.71   | 2.84E-14 | 1 |
| 3042  | 17206165 | ---                                                                                       |           | ---              | 2.16 | 2.16 | 2.16 | 1.35   | 0        | 1 |
| 6071  | 17219284 | ENSMUST00000157122 // Gm25151 // predicted gene, 25151 // --- // ---                      | Gm25151   | VSMUST000001571: | 2.16 | 2.16 | 2.16 | 1.51   | 0        | 1 |
| 3717  | 17207555 | ---                                                                                       |           | ---              | 2.16 | 2.16 | 2.16 | 1.77   | 0        | 1 |
| 5667  | 17214823 | ENSMUST00000083121 // n-R5s213 // nuclear encoded rRNA 5S 213 // --- // ---               | n-R5s213  | VSMUST000000831: | 2.15 | 2.15 | 2.15 | 2.01   | 0        | 1 |
| 31424 | 17468900 | NM_173775 // Ccdc37 // coiled-coil domain containing 37 // 6 D1 6 // 243538 // ENSMUST    | Ccdc37    | NM_173775        | 2.15 | 2.15 | 2.15 | 0.83   | 0        | 1 |
| 394   | 17200779 | ---                                                                                       |           | ---              | 2.15 | 2.15 | 2.15 | 3.00   | 0        | 1 |
| 24822 | 17402996 | NM_030143 // Ddit4l // DNA-damage-inducible transcript 4-like // 3 G3 3 // 73284 // EN    | Ddit4l    | NM_030143        | 2.15 | 2.15 | 2.15 | 3.69   | 0        | 1 |
| 8465  | 17243019 | ---                                                                                       |           | ---              | 2.15 | 2.15 | 2.15 | 1.50   | 1.71E-13 | 1 |
| 29462 | 17450387 | NM_010097 // Sparcl1 // SPARC-like 1 // 5 E4 5 50.55 cM // 13602 // ENSMUST00000031249    | Sparcl1   | NM_010097        | 2.15 | 2.15 | 2.15 | 21.93  | 1.71E-13 | 1 |
| 4302  | 17208741 | ---                                                                                       |           | ---              | 2.15 | 2.15 | 2.15 | 1.30   | 0        | 1 |
| 19633 | 17351280 | ENSMUST00000158431 // Gm23016 // predicted gene, 23016 // --- // ---                      | Gm23016   | VSMUST000001584: | 2.15 | 2.15 | 2.15 | 1.10   | 0        | 1 |
| 31901 | 17473941 | NM_009286 // Sult2a2 // sulfotransferase family 2A, dehydroepiandrosterone (DHEA)-prefe   | Sult2a2   | NM_009286        | 2.15 | 2.15 | 2.15 | 1.43   | 0        | 1 |
| 26325 | 17417842 | ENSMUST00000158966 // Gm24352 // predicted gene, 24352 // --- // ---                      | Gm24352   | VSMUST000001589: | 2.15 | 2.15 | 2.15 | 0.81   | 0        | 1 |
| 24691 | 17401563 | NM_146136 // Slc16a4 // solute carrier family 16 (monocarboxylic acid transporters), me   | Slc16a4   | NM_146136        | 2.15 | 2.15 | 2.15 | 3.21   | 0        | 1 |
| 34206 | 17494797 | NM_146498 // Olfr490 // olfactory receptor 490 // 7 E3 7 // 258491 // ENSMUST000000745    | Olfr490   | NM_146498        | 2.15 | 2.15 | 2.15 | 1.26   | 0        | 1 |
| 3043  | 17206167 | ---                                                                                       |           | ---              | 2.15 | 2.15 | 2.15 | 1.04   | 1.14E-13 | 1 |

|       |          |                                                                                          |           |                   |  |      |      |        |          |   |
|-------|----------|------------------------------------------------------------------------------------------|-----------|-------------------|--|------|------|--------|----------|---|
| 23668 | 17391483 | ---                                                                                      |           |                   |  | 2.15 | 2.15 | 10.28  | 0        | 1 |
| 6827  | 17226951 | ENSMUST00000158286 // Gm22609 // predicted gene, 22609 // --- // ---                     | Gm22609   | VSMUST00000158286 |  | 2.15 | 2.15 | 0.94   | 1.42E-14 | 1 |
| 31136 | 17466996 | NM_153573 // Fkbp14 // FK506 binding protein 14 // 6 B3 6 // 231997 /// XR_377439 // Fk  | Fkbp14    | NM_153573         |  | 2.14 | 2.14 | 17.28  | 5.68E-14 | 1 |
| 34832 | 17500994 | ENSMUST00000158936 // Gm24669 // predicted gene, 24669 // --- // ---                     | Gm24669   | VSMUST00000158936 |  | 2.14 | 2.14 | 1.13   | 0        | 1 |
| 62    | 17200109 | ---                                                                                      |           |                   |  | 2.14 | 2.14 | 1.47   | 0        | 1 |
| 31207 | 17467384 | ENSMUST00000103328 // Igkv10-96 // immunoglobulin kappa variable 10-96 // 6 C1 6 // 692  | Igkv10-96 | VSMUST00000103328 |  | 2.14 | 2.14 | 129.27 | 1.14E-13 | 1 |
| 20087 | 17355844 | ENSMUST00000083812 // Gm25005 // predicted gene, 25005 // --- // ---                     | Gm25005   | VSMUST00000083812 |  | 2.14 | 2.14 | 2.44   | 0        | 1 |
| 1333  | 17202687 | ---                                                                                      |           |                   |  | 2.14 | 2.14 | 4.17   | 0        | 1 |
| 20376 | 17358092 | ENSMUST00000158282 // Gm25437 // predicted gene, 25437 // --- // ---                     | Gm25437   | VSMUST00000158282 |  | 2.14 | 2.14 | 0.98   | 1.42E-14 | 1 |
| 29803 | 17454574 | NM_175274 // Ttyh3 // tweety homolog 3 (Drosophila) // 5 G2 5 // 78339 /// XM_006504768  | Ttyh3     | NM_175274         |  | 2.14 | 2.14 | 2.12   | 1.14E-13 | 1 |
| 4417  | 17208981 | ---                                                                                      |           |                   |  | 2.14 | 2.14 | 2.19   | 2.84E-14 | 1 |
| 1248  | 17202513 | ---                                                                                      |           |                   |  | 2.14 | 2.14 | 3.91   | 0        | 1 |
| 6849  | 17227221 | NM_007955 // Ptpvr // protein tyrosine phosphatase, receptor type, V // 1 1 // 13924 //  | Ptpvr     | NM_007955         |  | 2.13 | 2.13 | 3.68   | 5.68E-14 | 1 |
| 39225 | 17544073 | NM_199468 // Zcchc5 // zinc finger, CCHC domain containing 5 // X D X // 213436 /// ENS  | Zcchc5    | NM_199468         |  | 2.13 | 2.13 | 16.80  | 0        | 1 |
| 2566  | 17205197 | ---                                                                                      |           |                   |  | 2.13 | 2.13 | 1.13   | 5.68E-14 | 1 |
| 4618  | 17209387 | ---                                                                                      |           |                   |  | 2.13 | 2.13 | 1.13   | 5.68E-14 | 1 |
| 7442  | 17233384 | NM_021272 // Fabp7 // fatty acid binding protein 7, brain // 10 B4 10 // 12140 /// ENSM  | Fabp7     | NM_021272         |  | 2.13 | 2.13 | 2.76   | 2.84E-14 | 1 |
| 9648  | 17255260 | NM_007742 // Col1a1 // collagen, type I, alpha 1 // 11 D 11 59.01 cM // 12842 /// ENSMU  | Col1a1    | NM_007742         |  | 2.13 | 2.13 | 62.60  | 0        | 1 |
| 4398  | 17208941 | ---                                                                                      |           |                   |  | 2.13 | 2.13 | 2.05   | 0        | 1 |
| 23041 | 17385063 | ENSMUST00000158989 // Gm23505 // predicted gene, 23505 // --- // ---                     | Gm23505   | VSMUST00000158989 |  | 2.13 | 2.13 | 1.27   | 7.11E-15 | 1 |
| 25566 | 17410122 | ENSMUST00000157101 // Gm26275 // predicted gene, 26275 // --- // ---                     | Gm26275   | VSMUST00000157101 |  | 2.13 | 2.13 | 0.91   | 0        | 1 |
| 38983 | 17541806 | NM_001291748 // Xlr // X-linked lymphocyte-regulated // X A5 X // 22441 /// ENSMUST0000  | Xlr       | NM_001291748      |  | 2.13 | 2.13 | 5.06   | 0        | 1 |
| 32546 | 17479929 | NM_001105184 // Vmn2r71 // vomeronasal 2, receptor 71 // 7 D3 7 // 233445 /// ENSMUST00  | Vmn2r71   | NM_001105184      |  | 2.13 | 2.13 | 0.89   | 0        | 1 |
| 2594  | 17205253 | ---                                                                                      |           |                   |  | 2.13 | 2.13 | 1.66   | 2.84E-14 | 1 |
| 4646  | 17209443 | ---                                                                                      |           |                   |  | 2.13 | 2.13 | 1.66   | 2.84E-14 | 1 |
| 33527 | 17489420 | NM_019503 // Fxyd1 // FXYD domain-containing ion transport regulator 1 // 7 7 B1 // 561  | Fxyd1     | NM_019503         |  | 2.13 | 2.13 | 6.75   | 2.56E-13 | 1 |
| 4114  | 17208363 | ---                                                                                      |           |                   |  | 2.12 | 2.12 | 0.75   | 0        | 1 |
| 2580  | 17205225 | ---                                                                                      |           |                   |  | 2.12 | 2.12 | 1.26   | 4.26E-14 | 1 |
| 4632  | 17209415 | ---                                                                                      |           |                   |  | 2.12 | 2.12 | 1.26   | 4.26E-14 | 1 |
| 36678 | 17519345 | ENSMUST00000122776 // Gm24141 // predicted gene, 24141 // --- // ---                     | Gm24141   | VSMUST00000122776 |  | 2.12 | 2.12 | 0.93   | 0        | 1 |
| 28894 | 17445605 | ENSMUST00000158774 // Gm23312 // predicted gene, 23312 // --- // ---                     | Gm23312   | VSMUST00000158774 |  | 2.12 | 2.12 | 1.10   | 0        | 1 |
| 36153 | 17514447 | NM_009808 // Casp12 // caspase 12 // 9 A1 9 2.46 cM // 12364 /// ENSMUST0000027009 //    | Casp12    | NM_009808         |  | 2.12 | 2.12 | 21.24  | 0        | 1 |
| 19323 | 17348280 | ENSMUST00000158371 // Gm22765 // predicted gene, 22765 // --- // ---                     | Gm22765   | VSMUST00000158371 |  | 2.12 | 2.12 | 0.90   | 2.84E-14 | 1 |
| 20876 | 17363132 | NM_146701 // Olfr1448 // olfactory receptor 1448 // 19 C1 19 // 258696 /// ENSMUST00000  | Olfr1448  | NM_146701         |  | 2.12 | 2.12 | 1.41   | 0        | 1 |
| 18151 | 17336944 | ---                                                                                      |           |                   |  | 2.12 | 2.12 | 1.39   | 2.84E-14 | 1 |
| 18275 | 17337816 | NM_001285947 // Cyp39a1 // cytochrome P450, family 39, subfamily a, polypeptide 1 // 17  | Cyp39a1   | NM_001285947      |  | 2.12 | 2.12 | 1.79   | 1.14E-13 | 1 |
| 27365 | 17428278 | NM_177864 // Skint9 // selection and upkeep of intraepithelial T cells 9 // 4 D1 4 // 3  | Skint9    | NM_177864         |  | 2.12 | 2.12 | 0.82   | 0        | 1 |
| 2196  | 17204443 | ---                                                                                      |           |                   |  | 2.12 | 2.12 | 11.77  | 0        | 1 |
| 29404 | 17449710 | NM_008599 // Cxcl9 // chemokine (C-X-C motif) ligand 9 // 5 E2 5 46.51 cM // 17329 ///   | Cxcl9     | NM_008599         |  | 2.12 | 2.12 | 2.29   | 1.14E-13 | 1 |
| 31868 | 17473688 | NM_001013765 // Zscan4c // zinc finger and SCAN domain containing 4C // 7 A1 7 // 24510  | Zscan4c   | NM_001013765      |  | 2.12 | 2.12 | 1.66   | 0        | 1 |
| 18150 | 17336942 | ---                                                                                      |           |                   |  | 2.12 | 2.12 | 1.78   | 0        | 1 |
| 4912  | 17209977 | ---                                                                                      |           |                   |  | 2.11 | 2.11 | 9.74   | 2.84E-14 | 1 |
| 32852 | 17482826 | ---                                                                                      |           |                   |  | 2.11 | 2.11 | 1.04   | 0        | 1 |
| 11003 | 17269181 | NM_001126320 // Gm11563 // predicted gene 11563 // 11 D 11 // 100040248 /// ENSMUST0000  | Gm11563   | NM_001126320      |  | 2.11 | 2.11 | 0.64   | 0        | 1 |
| 6274  | 17220974 | BC068155 // Plxna2 // plexin A2 // 1 H6 1 // 18845 /// NM_008882 // Plxna2 // plexin A2  | Plxna2    | BC068155          |  | 2.11 | 2.11 | 17.68  | 1.14E-13 | 1 |
| 25361 | 17407829 | NM_144899 // Adamts14 // ADAMTS-like 4 // 3 F2.1 3 // 229595 /// ENSMUST0000015994 //    | Adamts14  | NM_144899         |  | 2.11 | 2.11 | 3.92   | 0        | 1 |
| 17587 | 17331238 | NM_146321 // Olfr186 // olfactory receptor 186 // 16 C2 16 // 258318 /// ENSMUST0000006  | Olfr186   | NM_146321         |  | 2.11 | 2.11 | 0.67   | 0        | 1 |
| 2736  | 17205541 | ---                                                                                      |           |                   |  | 2.11 | 2.11 | 5.95   | 1.14E-13 | 1 |
| 39418 | 17545543 | NM_001097980 // Gm16390 // predicted gene 16390 // X F3 X // 100040937 /// ENSMUST00000  | Gm16390   | NM_001097980      |  | 2.11 | 2.11 | 2.59   | 0        | 1 |
| 717   | 17201435 | ---                                                                                      |           |                   |  | 2.11 | 2.11 | 1.72   | 0        | 1 |
| 30960 | 17465227 | ENSMUST00000104008 // Gm22267 // predicted gene, 22267 // --- // ---                     | Gm22267   | VSMUST00000104008 |  | 2.11 | 2.11 | 0.85   | 3.55E-15 | 1 |
| 7994  | 17238685 | ENSMUST00000157522 // Gm24717 // predicted gene, 24717 // --- // ---                     | Gm24717   | VSMUST00000157522 |  | 2.11 | 2.11 | 1.46   | 0        | 1 |
| 30340 | 17459392 | ENSMUST00000103397 // Igkv3-10 // immunoglobulin kappa variable 3-10 // --- // ---       | Igkv3-10  | VSMUST00000103397 |  | 2.11 | 2.11 | 78.24  | 0        | 1 |
| 2436  | 17204931 | ---                                                                                      |           |                   |  | 2.11 | 2.11 | 2.32   | 0        | 1 |
| 7612  | 17234861 | NM_147041 // Olfr57 // olfactory receptor 57 // 10 C1 10 // 18357 /// ENSMUST000008224   | Olfr57    | NM_147041         |  | 2.10 | 2.10 | 0.76   | 0        | 1 |
| 1434  | 17202893 | ---                                                                                      |           |                   |  | 2.10 | 2.10 | 0.91   | 1.71E-13 | 1 |
| 31178 | 17467265 | ---                                                                                      |           |                   |  | 2.10 | 2.10 | 1.47   | 0        | 1 |
| 24185 | 17396383 | NM_009425 // Tnfrsf10 // tumor necrosis factor (ligand) superfamily, member 10 // 3 A3 3 | Tnfrsf10  | NM_009425         |  | 2.10 | 2.10 | 4.30   | 1.14E-13 | 1 |
| 17099 | 17326563 | ENSMUST00000157663 // Gm23591 // predicted gene, 23591 // --- // ---                     | Gm23591   | VSMUST00000157663 |  | 2.10 | 2.10 | 0.99   | 0        | 1 |
| 16565 | 17321336 | NM_011718 // Wnt10b // wingless-type MMTV integration site family, member 10B // 15 F1   | Wnt10b    | NM_011718         |  | 2.10 | 2.10 | 3.64   | 8.53E-14 | 1 |
| 13391 | 17290928 | ---                                                                                      |           |                   |  | 2.10 | 2.10 | 2.95   | 8.53E-14 | 1 |
| 13432 | 17291064 | BC150715 // Vmn1r189 // vomeronasal 1 receptor 189 // 13 A3.1 13 // 252906               | Vmn1r189  | BC150715          |  | 2.10 | 2.10 | 1.86   | 0        | 1 |
| 4920  | 17209993 | ---                                                                                      |           |                   |  | 2.10 | 2.10 | 5.85   | 2.84E-14 | 1 |
| 791   | 17201585 | ---                                                                                      |           |                   |  | 2.10 | 2.10 | 2.55   | 1.42E-14 | 1 |
| 1864  | 17203771 | ---                                                                                      |           |                   |  | 2.10 | 2.10 | 0.82   | 0        | 1 |
| 3242  | 17206577 | ---                                                                                      |           |                   |  | 2.10 | 2.10 | 0.90   | 2.84E-14 | 1 |
| 2481  | 17205023 | ---                                                                                      |           |                   |  | 2.10 | 2.10 | 0.98   | 8.53E-14 | 1 |
| 4533  | 17209213 | ---                                                                                      |           |                   |  | 2.10 | 2.10 | 0.98   | 8.53E-14 | 1 |
| 24506 | 17399883 | NM_011474 // Sprr2h // small proline-rich protein 2H // 3 F1 3 40.14 cM // 20762 /// EN  | Sprr2h    | NM_011474         |  | 2.10 | 2.10 | 1.80   | 0        | 1 |
| 6546  | 17223659 | ENSMUST00000147177 // Gm11610 // predicted gene 11610 // --- // ---                      | Gm11610   | VSMUST00000147177 |  | 2.10 | 2.10 | 0.70   | 0        | 1 |
| 15549 | 17310368 | NM_175501 // Adamts12 // a disintegrin-like and metalloprotease (repolysin type) with    | Adamts12  | NM_175501         |  | 2.10 | 2.10 | 13.72  | 1.71E-13 | 1 |
| 15033 | 17305439 | NM_006519825 // Gm8094 // predicted gene 8094 // 14 C1 14 // 666420 /// ENSMUST00000165  | Gm8094    | NM_006519825      |  | 2.10 | 2.10 | 2.64   | 0        | 1 |
| 28388 | 17439532 | ENSMUST00000112956 // Gm11111 // predicted gene 11111 // --- // ---                      | Gm11111   | VSMUST00000112956 |  | 2.10 | 2.10 | 1.50   | 1.14E-13 | 1 |
| 4213  | 17208563 | ---                                                                                      |           |                   |  | 2.10 | 2.10 | 1.18   | 2.84E-14 | 1 |
| 17287 | 17328238 | ENSMUST00000131985 // Gm15738 // predicted gene 15738 // --- // --- /// ENSMUST00000140  | Gm15738   | VSMUST00000131985 |  | 2.10 | 2.10 | 0.68   | 0        | 1 |
| 36097 | 17513963 | ---                                                                                      |           |                   |  | 2.10 | 2.10 | 1.12   | 0        | 1 |
| 5225  | 17210615 | ---                                                                                      |           |                   |  | 2.10 | 2.10 | 4.13   | 2.84E-14 | 1 |
| 3617  | 17207351 | ---                                                                                      |           |                   |  | 2.09 | 2.09 | 0.69   | 1.14E-13 | 1 |
| 26158 | 17415932 | NM_001177602 // Ak4 // adenylate kinase 4 // 4 C6 4 46.84 cM // 11639 /// XM_006502684   | Ak4       | NM_001177602      |  | 2.09 | 2.09 | 3.75   | 0        | 1 |
| 20697 | 17361178 | ---                                                                                      |           |                   |  | 2.09 | 2.09 | 0.70   | 0        | 1 |
| 30904 | 17464654 | NM_013743 // Pdk4 // pyruvate dehydrogenase kinase, isoenzyme 4 // 6 A1 6 2.06 cM // 27  | Pdk4      | NM_013743         |  | 2.09 | 2.09 | 39.71  | 2.27E-13 | 1 |
| 24592 | 17400599 | NM_001009935 // Txnip // thioredoxin interacting protein // 3 F2.2 3 41.93 cM // 56338   | Txnip     | NM_001009935      |  | 2.09 | 2.09 | 31.09  | 0        | 1 |
| 1710  | 17203451 | ---                                                                                      |           |                   |  | 2.09 | 2.09 | 2.94   | 0        | 1 |
| 1028  | 17202067 | ---                                                                                      |           |                   |  | 2.09 | 2.09 | 0.97   | 2.84E-14 | 1 |
| 13984 | 17296344 | NM_008046 // Fst // follistatin // 13 D2.2 13 // 14313 /// ENSMUST0000022287 // Fst //   | Fst       | NM_008046         |  | 2.09 | 2.09 | 20.70  | 1.71E-13 | 1 |
| 31693 | 17471920 | NM_198669 // Prb1 // proline-rich protein BstNI subfamily 1 // 6 G1 6 // 381833 /// ENS  | Prb1      | NM_198669         |  | 2.09 | 2.09 | 0.74   | 5.68E-14 | 1 |
| 23632 | 17391442 | ---                                                                                      |           |                   |  | 2.09 | 2.09 | 5.76   | 0        | 1 |
| 11218 | 17271399 | NM_147220 // Abca9 // ATP-binding cassette, sub-family A (ABC1), member 9 // 11 E1 11 /  | Abca9     | NM_147220         |  | 2.09 | 2.09 | 11.74  | 0        | 1 |
| 4760  | 17209671 | ---                                                                                      |           |                   |  | 2.09 | 2.09 | 1.95   | 1.42E-14 | 1 |
| 2733  | 17205535 | ---                                                                                      |           |                   |  | 2.09 | 2.09 | 3.72   | 5.68E-14 | 1 |
| 5488  | 17212442 | ENSMUST00000160854 // Gulp1 // GULP, engulfment adaptor PTB domain containing 1 // 1 1   | Gulp1     | VSMUST00000160854 |  | 2.09 | 2.09 | 30.47  | 5.68E-14 | 1 |
| 17235 | 17327737 | NM_175347 // Srl // sarcalumenin // 16 A1 16 // 106393 /// ENSMUST0000023161 // Srl //   | Srl       | NM_175347         |  | 2.09 | 2.09 | 1.47   | 5.68E-14 | 1 |
| 927   | 17201861 | ---                                                                                      |           |                   |  | 2.09 | 2.09 | 0.78   | 1.14E-13 | 1 |
| 12777 | 17285742 | NM_175665 // Hist1h2bk // histone cluster 1, H2bk // 13 A2-A3 13 // 319184 /// ENSMUST0  | Hist1h2bk | NM_175665         |  | 2.09 | 2.09 | 1.76   | 0        | 1 |
| 605   | 17201207 | ---                                                                                      |           |                   |  | 2.09 | 2.09 | 0.87   | 0        | 1 |

|       |          |                                                                                         |               |                  |      |      |        |          |   |
|-------|----------|-----------------------------------------------------------------------------------------|---------------|------------------|------|------|--------|----------|---|
| 25518 | 17409575 | ENSMUST0000067980 // Amy1 // amylase 1, salivary // 3 F3 3 49.35 cM // 11722 /// NM_00  | Amy1          | VSMUST000006798  | 2.09 | 2.09 | 1.46   | 1.42E-14 | 1 |
| 2975  | 17206025 | ---                                                                                     |               | ---              | 2.09 | 2.09 | 0.94   | 0        | 1 |
| 6837  | 17227077 | NM_054077 // Prelp // proline arginine-rich end leucine-rich repeat // 1 E4 1 58.02 cM  | Prelp         | NM_054077        | 2.08 | 2.08 | 30.08  | 0        | 1 |
| 2834  | 17205739 | ---                                                                                     |               | ---              | 2.08 | 2.08 | 5.31   | 0        | 1 |
| 143   | 17200273 | ---                                                                                     |               | ---              | 2.08 | 2.08 | 2.46   | 3.55E-14 | 1 |
| 12553 | 17284358 | ENSMUST00000103429 // Ighj2 // immunoglobulin heavy joining 2 // --- // ---             | Ighj2         | VSMUST0000010342 | 2.08 | 2.08 | 49.97  | 0        | 1 |
| 3086  | 17206255 | ---                                                                                     |               | ---              | 2.08 | 2.08 | 9.68   | 0        | 1 |
| 31196 | 17467345 | NM_144548 // IL23r // interleukin 23 receptor // 6 C1 6 // 209590 /// ENSMUST0000011836 | IL23r         | NM_144548        | 2.08 | 2.08 | 1.43   | 0        | 1 |
| 13418 | 17291005 | NM_020034 // Hist1h1b // histone cluster 1, H1b // 13 13 A2-A3 // 56702 /// ENSMUST0000 | Hist1h1b      | NM_020034        | 2.08 | 2.08 | 1.88   | 2.84E-14 | 1 |
| 20578 | 17359952 | ---                                                                                     |               | ---              | 2.08 | 2.08 | 2.98   | 0        | 1 |
| 4005  | 17208137 | ---                                                                                     |               | ---              | 2.08 | 2.08 | 1.00   | 0        | 1 |
| 34805 | 17500735 | NM_026840 // Pdgfrl // platelet-derived growth factor receptor-like // 8 A4 8 // 68797  | Pdgfrl        | NM_026840        | 2.08 | 2.08 | 5.49   | 0        | 1 |
| 39174 | 17543560 | ENSMUST00000157489 // Gm24061 // predicted gene, 24061 // --- // ---                    | Gm24061       | VSMUST0000015748 | 2.08 | 2.08 | 0.86   | 0        | 1 |
| 21546 | 17369787 | NR_029811 // Mir199b // microRNA 199b // 2 2 // 387239 /// ENSMUST00000175066 // Mir199 | Mir199b       | NR_029811        | 2.08 | 2.08 | 16.23  | 0        | 1 |
| 14444 | 17300133 | ENSMUST00000167781 // Traj60 // T cell receptor alpha joining 60 // --- // ---          | Traj60        | VSMUST0000016778 | 2.08 | 2.08 | 0.69   | 7.11E-15 | 1 |
| 1419  | 17202861 | ---                                                                                     |               | ---              | 2.08 | 2.08 | 3.32   | 5.68E-14 | 1 |
| 33746 | 17491511 | ENSMUST00000178642 // Gm25934 // predicted gene, 25934 // --- // ---                    | Gm25934       | VSMUST0000017864 | 2.08 | 2.08 | 1.19   | 0        | 1 |
| 531   | 17201059 | ---                                                                                     |               | ---              | 2.08 | 2.08 | 2.66   | 5.68E-14 | 1 |
| 28922 | 17445807 | ENSMUST00000157188 // Gm22490 // predicted gene, 22490 // --- // ---                    | Gm22490       | VSMUST0000015718 | 2.08 | 2.08 | 1.46   | 0        | 1 |
| 3315  | 17206731 | ---                                                                                     |               | ---              | 2.08 | 2.08 | 11.84  | 0        | 1 |
| 1654  | 17203337 | ---                                                                                     |               | ---              | 2.07 | 2.07 | 0.91   | 0        | 1 |
| 5706  | 17215240 | XR_387203 // Efh1 // EF hand domain containing 1 // 1 D 1 // 98363 /// ENSMUST00000118  | Efh1          | XR_387203        | 2.07 | 2.07 | 4.24   | 0        | 1 |
| 6311  | 17221235 | ---                                                                                     |               | ---              | 2.07 | 2.07 | 2.66   | 1.14E-13 | 1 |
| 10596 | 17265026 | NM_153143 // Kctd11 // potassium channel tetramerisation domain containing 11 // 11 B3  | Kctd11        | NM_153143        | 2.07 | 2.07 | 5.21   | 2.27E-13 | 1 |
| 5768  | 17216031 | NM_145519 // Farp2 // FERM, RhoGEF and pleckstrin domain protein 2 // 1 D 1 // 227377 / | Farp2         | NM_145519        | 2.07 | 2.07 | 6.11   | 0        | 1 |
| 24857 | 17403363 | NM_027770 // Col24a1 // collagen, type XXIV, alpha 1 // 3 3 H3 // 71355 /// ENSMUST0000 | Col24a1       | NM_027770        | 2.07 | 2.07 | 4.63   | 2.27E-13 | 1 |
| 19514 | 17350086 | ENSMUST00000157986 // Gm22483 // predicted gene, 22483 // --- // ---                    | Gm22483       | VSMUST0000015798 | 2.07 | 2.07 | 0.73   | 2.84E-14 | 1 |
| 37855 | 17532433 | ENSMUST00000180685 // Gm26797 // predicted gene, 26797 // --- // ---                    | Gm26797       | VSMUST0000018068 | 2.07 | 2.07 | 4.84   | 2.84E-14 | 1 |
| 12630 | 17284568 | ENSMUST00000103520 // Ighv8-5 // immunoglobulin heavy variable V8-5 // --- // ---       | Ighv8-5       | VSMUST0000010352 | 2.07 | 2.07 | 109.80 | 0        | 1 |
| 2680  | 17205429 | ---                                                                                     |               | ---              | 2.07 | 2.07 | 3.43   | 0        | 1 |
| 23259 | 17387742 | NM_146770 // Olfr259 // olfactory receptor 259 // 2 E1 2 // 258766 /// ENSMUST000000998 | Olfr259       | NM_146770        | 2.07 | 2.07 | 0.64   | 2.84E-14 | 1 |
| 38084 | 17534249 | ---                                                                                     |               | ---              | 2.07 | 2.07 | 1.14   | 0        | 1 |
| 4179  | 17208493 | ---                                                                                     |               | ---              | 2.07 | 2.07 | 0.97   | 0        | 1 |
| 23866 | 17393353 | ENSMUST00000124586 // BC029722 // cDNA sequence BC029722 // 2 H1 2 // 613262 /// NR_015 | BC029722      | VSMUST0000012458 | 2.07 | 2.07 | 1.36   | 0        | 1 |
| 39840 | 17547624 | ---                                                                                     |               | ---              | 2.07 | 2.07 | 1.13   | 1.42E-14 | 1 |
| 19976 | 17354755 | NR_029879 // Mir378a // microRNA 378a // 18 18 // 723889                                | Mir378a       | NR_029879        | 2.07 | 2.07 | 1.12   | 0        | 1 |
| 4991  | 17210139 | ---                                                                                     |               | ---              | 2.07 | 2.07 | 5.66   | 0        | 1 |
| 1737  | 17203509 | ---                                                                                     |               | ---              | 2.07 | 2.07 | 4.82   | 0        | 1 |
| 11634 | 17276139 | NM_001190466 // Dact1 // dapper homolog 1, antagonist of beta-catenin (xenopus) // 12 C | Dact1         | NM_001190466     | 2.06 | 2.06 | 17.82  | 0        | 1 |
| 30936 | 17464963 | ENSMUST00000139701 // Gm4876 // predicted gene 4876 // 6 A2 6 // 232599 /// AK047082 // | Gm4876        | VSMUST0000013970 | 2.06 | 2.06 | 1.72   | 0        | 1 |
| 34823 | 17500919 | ENSMUST00000127040 // Gm16352 // predicted gene 16352 // --- // --- ENSMUST00000136     | Gm16352       | VSMUST0000012704 | 2.06 | 2.06 | 6.39   | 0        | 1 |
| 13832 | 17294475 | ENSMUST00000104467 // Gm23319 // predicted gene, 23319 // --- // ---                    | Gm23319       | VSMUST0000010446 | 2.06 | 2.06 | 1.11   | 1.07E-14 | 1 |
| 28410 | 17439687 | NM_011204 // Ptpn13 // protein tyrosine phosphatase, non-receptor type 13 // 5 E-F 5 50 | Ptpn13        | NM_011204        | 2.06 | 2.06 | 5.51   | 5.68E-14 | 1 |
| 10861 | 17267766 | ENSMUST00000157395 // Gm22762 // predicted gene, 22762 // --- // ---                    | Gm22762       | VSMUST0000015739 | 2.06 | 2.06 | 1.65   | 0        | 1 |
| 23900 | 17393764 | ENSMUST00000104797 // Gm23134 // predicted gene, 23134 // --- // ---                    | Gm23134       | VSMUST0000010479 | 2.06 | 2.06 | 3.42   | 0        | 1 |
| 16103 | 17316197 | NM_001242423 // Fam105a // family with sequence similarity 105, member A // 15 B1 15 // | Fam105a       | NM_001242423     | 2.06 | 2.06 | 3.16   | 0        | 1 |
| 16054 | 17315656 | ENSMUST00000116945 // Gm22031 // predicted gene, 22031 // --- // ---                    | Gm22031       | VSMUST0000011694 | 2.06 | 2.06 | 0.66   | 0        | 1 |
| 15601 | 17311058 | ENSMUST00000158508 // Gm24771 // predicted gene, 24771 // --- // ---                    | Gm24771       | VSMUST0000015850 | 2.06 | 2.06 | 3.93   | 0        | 1 |
| 1035  | 17202081 | ---                                                                                     |               | ---              | 2.06 | 2.06 | 0.92   | 1.14E-13 | 1 |
| 20715 | 17361435 | NM_153553 // Npas4 // neuronal PAS domain protein 4 // 19 A 19 // 225872 /// XM_0065317 | Npas4         | NM_153553        | 2.06 | 2.06 | 1.63   | 1.14E-13 | 1 |
| 16826 | 17323822 | ENSMUST00000103984 // Gm25762 // predicted gene, 25762 // --- // ---                    | Gm25762       | VSMUST0000010398 | 2.06 | 2.06 | 2.64   | 0        | 1 |
| 27434 | 17428883 | ---                                                                                     |               | ---              | 2.05 | 2.05 | 3.60   | 2.84E-14 | 1 |
| 23248 | 17387714 | ENSMUST00000130722 // Gm13723 // predicted gene 13723 // --- // ---                     | Gm13723       | VSMUST0000013072 | 2.05 | 2.05 | 1.35   | 0        | 1 |
| 34906 | 17501516 | ENSMUST00000098716 // Gm10663 // predicted gene 10663 // --- // ---                     | Gm10663       | VSMUST0000009871 | 2.05 | 2.05 | 1.89   | 0        | 1 |
| 23404 | 17388725 | NM_010218 // Fjx1 // four jointed box 1 (Drosophila) // 2 E 2 // 14221 /// ENSMUST0000  | Fjx1          | NM_010218        | 2.05 | 2.05 | 2.64   | 0        | 1 |
| 3927  | 17207979 | ---                                                                                     |               | ---              | 2.05 | 2.05 | 1.49   | 2.84E-14 | 1 |
| 4176  | 17208487 | ---                                                                                     |               | ---              | 2.05 | 2.05 | 0.92   | 0        | 1 |
| 15401 | 17308772 | NM_172488 // Lacc1 // laccase (multicopper oxidoreductase) domain containing 1 // 14 D3 | Lacc1         | NM_172488        | 2.05 | 2.05 | 8.26   | 5.68E-14 | 1 |
| 20122 | 17356216 | NM_001162946 // Pcx // pyruvate carboxylase // 19 A 19 4.07 cM // 18563 /// NM_008797 / | Pcx           | NM_001162946     | 2.05 | 2.05 | 8.19   | 2.27E-13 | 1 |
| 4993  | 17210143 | ---                                                                                     |               | ---              | 2.05 | 2.05 | 12.82  | 0        | 1 |
| 39211 | 17543889 | ENSMUST00000158335 // Gm22090 // predicted gene, 22090 // --- // ---                    | Gm22090       | VSMUST0000015833 | 2.05 | 2.05 | 1.48   | 0        | 1 |
| 1900  | 17203845 | ---                                                                                     |               | ---              | 2.05 | 2.05 | 6.32   | 0        | 1 |
| 2529  | 17205119 | ---                                                                                     |               | ---              | 2.05 | 2.05 | 2.71   | 2.84E-14 | 1 |
| 4581  | 17209309 | ---                                                                                     |               | ---              | 2.05 | 2.05 | 2.71   | 2.84E-14 | 1 |
| 38766 | 17539824 | NR_029574 // Mir188 // microRNA 188 // X X // 387183 /// ENSMUST00000083464 // Mir188 / | Mir188        | NR_029574        | 2.05 | 2.05 | 0.58   | 1.14E-13 | 1 |
| 3270  | 17206635 | ---                                                                                     |               | ---              | 2.05 | 2.05 | 2.09   | 0        | 1 |
| 16265 | 17317799 | ENSMUST00000179578 // Gm24390 // predicted gene, 24390 // --- // ---                    | Gm24390       | VSMUST0000017957 | 2.04 | 2.04 | 1.34   | 0        | 1 |
| 40752 | 17549560 | ---                                                                                     |               | ---              | 2.04 | 2.04 | 0.63   | 0        | 1 |
| 4971  | 17210097 | ---                                                                                     |               | ---              | 2.04 | 2.04 | 4.90   | 0        | 1 |
| 37348 | 17526657 | ENSMUST00000082739 // Gm22805 // predicted gene, 22805 // --- // ---                    | Gm22805       | VSMUST0000008273 | 2.04 | 2.04 | 1.83   | 1.42E-14 | 1 |
| 6265  | 17220904 | XR_399286 // Gm15867 // predicted gene 15867 // 1 1 97.55 cM // 100503471 /// ENSMUST00 | Gm15867       | XR_399286        | 2.04 | 2.04 | 3.06   | 0        | 1 |
| 18795 | 17342829 | NM_001098226 // Tead3 // TEA domain family member 3 // 17 A3.3 17 14.66 cM // 21678 /// | Tead3         | NM_001098226     | 2.04 | 2.04 | 5.44   | 1.71E-13 | 1 |
| 473   | 17200941 | ---                                                                                     |               | ---              | 2.04 | 2.04 | 0.86   | 0        | 1 |
| 32177 | 17476188 | ENSMUST00000032803 // Zfp30 // zinc finger protein 30 // 7 B1 7 17.26 cM // 22693 /// E | Zfp30         | VSMUST0000003280 | 2.03 | 2.03 | 3.13   | 0        | 1 |
| 16180 | 17316977 | NR_035444 // Mir1907 // microRNA 1907 // 15 15 19.19 cM // 100316685 /// ENSMUST0000012 | Mir1907       | NR_035444        | 2.03 | 2.03 | 4.97   | 1.71E-13 | 1 |
| 13640 | 17292722 | NM_028870 // Cltb // clathrin, light polypeptide (Lcb) // 13 B1 13 // 74325 /// ENSMUST | Cltb          | NM_028870        | 2.03 | 2.03 | 0.57   | 5.68E-14 | 1 |
| 11068 | 17269748 | NM_008986 // Ptrf // polymerase I and transcript release factor // 11 D 11 63.95 cM //  | Ptrf          | NM_008986        | 2.03 | 2.03 | 7.31   | 0        | 1 |
| 4932  | 17210019 | ---                                                                                     |               | ---              | 2.03 | 2.03 | 4.96   | 5.68E-14 | 1 |
| 9414  | 17252710 | NM_207224 // Olfr384 // olfactory receptor 384 // 11 B4 11 // 193053 /// ENSMUST0000007 | Olfr384       | NM_207224        | 2.03 | 2.03 | 1.13   | 0        | 1 |
| 13705 | 17293313 | NM_008086 // Gas1 // growth arrest specific 1 // 13 B3-C2 13 31.92 cM // 14451 /// ENSM | Gas1          | NM_008086        | 2.03 | 2.03 | 19.10  | 0        | 1 |
| 18152 | 17336946 | ---                                                                                     |               | ---              | 2.03 | 2.03 | 6.78   | 0        | 1 |
| 29978 | 17456414 | NM_080847 // Asb15 // ankyrin repeat and SOCS box-containing 15 // 6 A3.1 6 // 78910 // | Asb15         | NM_080847        | 2.03 | 2.03 | 1.13   | 0        | 1 |
| 8727  | 17245900 | ENSMUST00000158744 // Gm23819 // predicted gene, 23819 // --- // ---                    | Gm23819       | VSMUST0000015874 | 2.03 | 2.03 | 0.69   | 0        | 1 |
| 14094 | 17297495 | ENSMUST00000175013 // 6230400D17Rik // RIKEN cDNA 6230400D17 gene // 14 14 // 76133 /// | 6230400D17Rik | VSMUST0000017501 | 2.03 | 2.03 | 1.05   | 5.68E-14 | 1 |
| 27208 | 17426942 | ENSMUST00000082753 // Gm25811 // predicted gene, 25811 // --- // ---                    | Gm25811       | VSMUST0000008275 | 2.03 | 2.03 | 0.69   | 2.84E-14 | 1 |
| 4309  | 17208755 | ---                                                                                     |               | ---              | 2.03 | 2.03 | 1.39   | 5.68E-14 | 1 |
| 6505  | 17223138 | NM_001163314 // Pgap1 // post-GPI attachment to proteins 1 // 1 C1.1 1 // 241062 /// EN | Pgap1         | NM_001163314     | 2.03 | 2.03 | 3.33   | 0        | 1 |
| 31591 | 17470792 | NR_029554 // Mir141 // microRNA 141 // 6 6 // 387159 /// ENSMUST00000083540 // Mir141 / | Mir141        | NR_029554        | 2.03 | 2.03 | 1.02   | 0        | 1 |
| 4822  | 17209797 | ---                                                                                     |               | ---              | 2.03 | 2.03 | 3.56   | 0        | 1 |
| 2866  | 17205807 | ---                                                                                     |               | ---              | 2.03 | 2.03 | 1.90   | 2.84E-14 | 1 |
| 37148 | 17524746 | NR_035496 // Mir1946b // microRNA 1946b // 9 9 7.84 cM // 100316714 /// ENSMUST00000157 | Mir1946b      | NR_035496        | 2.02 | 2.02 | 0.78   | 7.11E-15 | 1 |
| 3123  | 17206329 | ---                                                                                     |               | ---              | 2.02 | 2.02 | 0.71   | 0        | 1 |
| 75    | 17200135 | ---                                                                                     |               | ---              | 2.02 | 2.02 | 2.90   | 1.71E-13 | 1 |
| 3890  | 17207903 | ---                                                                                     |               | ---              | 2.02 | 2.02 | 4.97   | 0        | 1 |
| 12176 | 17280932 | ENSMUST00000158400 // Gm25015 // predicted gene, 25015 // --- // ---                    | Gm25015       | VSMUST0000015840 | 2.02 | 2.02 | 0.72   | 0        | 1 |

|       |          |                                                                                            |     |               |                   |      |       |       |          |   |
|-------|----------|--------------------------------------------------------------------------------------------|-----|---------------|-------------------|------|-------|-------|----------|---|
| 1680  | 17203391 | ---                                                                                        | --- | ---           | ---               | 2.02 | 2.02  | 3.09  | 0        | 1 |
| 575   | 17201147 | ---                                                                                        | --- | ---           | ---               | 2.02 | 2.02  | 4.62  | 2.84E-14 | 1 |
| 25097 | 17405627 | ENSMUST00000176568 // Vmn2r-ps11 // vomeronasal 2, receptor, pseudogene 11 // --- // --    | --- | Vmn2r-ps11    | VSMUST00000176568 | 2.02 | 2.02  | 1.02  | 7.11E-15 | 1 |
| 6559  | 17223787 | NR_038009 // 281040811Rik // RIKEN cDNA 281040811 gene // 1 1 // 69941 // ENSMUST000       | --- | 281040811Rik  | NR_038009         | 2.02 | 2.02  | 1.10  | 1.42E-14 | 1 |
| 13314 | 17290205 | NM_001037925 // BC147527 // cDNA sequence BC147527 // 13 13 // 625360 // XM_006517732      | --- | BC147527      | NM_001037925      | 2.02 | 2.02  | 6.21  | 0        | 1 |
| 38803 | 17540188 | NM_016911 // Srpx // sushi-repeat-containing protein // X X A1.2 // 51795 // ENSMUST000    | --- | Srpx          | NM_016911         | 2.02 | 2.02  | 29.63 | 5.68E-14 | 1 |
| 12655 | 17284638 | ENSMUST00000081809 // lghv1-73 // immunoglobulin heavy variable 1-73 // --- // ---         | --- | lghv1-73      | VSMUST00000081809 | 2.02 | 2.02  | 64.15 | 0        | 1 |
| 7077  | 17229965 | ENSMUST00000104064 // Gm26077 // predicted gene, 26077 // --- // ---                       | --- | Gm26077       | VSMUST00000104064 | 2.02 | 2.02  | 0.67  | 0        | 1 |
| 32339 | 17477428 | NM_001034115 // Shank1 // SH3/ankyrin domain gene 1 // 7 B4 7 // 243961 // XM_00654086     | --- | Shank1        | NM_001034115      | 2.02 | 2.02  | 1.23  | 0        | 1 |
| 4935  | 17210025 | ---                                                                                        | --- | ---           | ---               | 2.02 | 2.02  | 1.80  | 2.84E-14 | 1 |
| 26254 | 17417115 | ENSMUST00000083113 // Gm24045 // predicted gene, 24045 // --- // ---                       | --- | Gm24045       | VSMUST00000083113 | 2.02 | 2.02  | 5.31  | 0        | 1 |
| 25415 | 17408352 | NM_008293 // Hsd3b1 // hydroxy-delta-5-steroid dehydrogenase, 3 beta- and steroid delta    | --- | Hsd3b1        | NM_008293         | 2.02 | 2.02  | 0.64  | 0        | 1 |
| 30103 | 17457697 | ENSMUST00000103271 // Trbv13-3 // T cell receptor beta, variable 13-3 // --- // --- // --- | --- | Trbv13-3      | VSMUST00000103271 | 2.02 | 2.02  | 32.58 | 0        | 1 |
| 2942  | 17205959 | ---                                                                                        | --- | ---           | ---               | 2.02 | 2.02  | 2.24  | 0        | 1 |
| 5110  | 17210383 | ---                                                                                        | --- | ---           | ---               | 2.02 | 2.02  | 2.32  | 2.84E-14 | 1 |
| 12945 | 17287005 | BC050752 // Cap2 // CAP, adenylate cyclase-associated protein, 2 (yeast) // 13 A5 13 //    | --- | Cap2          | BC050752          | 2.01 | 2.01  | 4.87  | 2.27E-13 | 1 |
| 9768  | 17256429 | XR_389044 // LOC102636037 // uncharacterized LOC102636037 // --- // 102636037 // XR_38     | --- | LOC102636037  | XR_389044         | 2.01 | 2.01  | 0.99  | 0        | 1 |
| 40278 | 17548567 | ---                                                                                        | --- | ---           | ---               | 2.01 | 2.01  | 1.09  | 2.84E-14 | 1 |
| 25442 | 17408648 | ENSMUST00000029440 // Olfm13 // olfactomedin-like 3 // 3 F2.2 3 // 99543 // ENSMUST000     | --- | Olfm13        | VSMUST00000029440 | 2.01 | 2.01  | 4.88  | 0        | 1 |
| 39385 | 17545287 | ENSMUST00000132626 // Gm15104 // predicted gene 15104 // X F3 X // 333588 // BC099570      | --- | Gm15104       | VSMUST00000132626 | 2.01 | 2.01  | 2.09  | 0        | 1 |
| 31897 | 17473912 | ENSMUST00000157736 // Gm23499 // predicted gene, 23499 // --- // ---                       | --- | Gm23499       | VSMUST00000157736 | 2.01 | 2.01  | 0.66  | 0        | 1 |
| 38744 | 17539653 | XR_406499 // LOC102641779 // uncharacterized LOC102641779 // --- // 102641779 // ENSMU     | --- | LOC102641779  | XR_406499         | 2.01 | 2.01  | 0.65  | 0        | 1 |
| 11028 | 17269252 | NM_001195383 // 2300003K06Rik // RIKEN cDNA 2300003K06 gene // 11 11 // 100502865 // E     | --- | 2300003K06Rik | NM_001195383      | 2.01 | 2.01  | 1.27  | 0        | 1 |
| 9599  | 17254809 | NM_172448 // Rnf43 // ring finger protein 43 // 11 C 11 // 207742 // XM_006536449 // R     | --- | Rnf43         | NM_172448         | 2.01 | 2.01  | 0.97  | 0        | 1 |
| 11908 | 17278795 | XR_394816 // LOC102642047 // uncharacterized LOC102642047 // --- // 102642047 // XR_39     | --- | LOC102642047  | XR_394816         | 2.01 | 2.01  | 1.42  | 0        | 1 |
| 31959 | 17474480 | NM_011383 // Six5 // sine oculis-related homeobox 5 // 7 A3 7 9.46 cM // 20475 // XM_0     | --- | Six5          | NM_011383         | 2.01 | 2.01  | 4.07  | 2.27E-13 | 1 |
| 12864 | 17286308 | ENSMUST00000070258 // Gm5447 // predicted gene 5447 // 13 A3.2 13 // 432743 // AK07731     | --- | Gm5447        | VSMUST00000070258 | 2.01 | 2.01  | 0.65  | 1.42E-14 | 1 |
| 4413  | 17208971 | ---                                                                                        | --- | ---           | ---               | 2.01 | 2.01  | 3.45  | 0        | 1 |
| 30665 | 17462608 | NR_027619 // Mug-ps1 // murinoglobulin, pseudogene 1 // 6 F1 6 // 17835                    | --- | Mug-ps1       | NR_027619         | 2.01 | 2.01  | 0.63  | 2.84E-14 | 1 |
| 38508 | 17537934 | ENSMUST00000158239 // Gm23068 // predicted gene, 23068 // --- // ---                       | --- | Gm23068       | VSMUST00000158239 | 2.01 | 2.01  | 0.68  | 1.42E-14 | 1 |
| 9060  | 17248957 | NM_146470 // Olfr1392 // olfactory receptor 1392 // 11 B1 11 // 258462 // BC120614 //      | --- | Olfr1392      | NM_146470         | 2.01 | 2.01  | 2.76  | 3.55E-14 | 1 |
| 2514  | 17205089 | ---                                                                                        | --- | ---           | ---               | 2.01 | 2.01  | 1.53  | 0        | 1 |
| 4566  | 17209279 | ---                                                                                        | --- | ---           | ---               | 2.01 | 2.01  | 1.53  | 0        | 1 |
| 51    | 17200087 | ---                                                                                        | --- | ---           | ---               | 2.00 | 2.00  | 1.01  | 0        | 1 |
| 35912 | 17512149 | ENSMUST00000157360 // Gm22223 // predicted gene, 22223 // --- // ---                       | --- | Gm22223       | VSMUST00000157360 | 2.00 | 2.00  | 0.84  | 4.26E-14 | 1 |
| 12859 | 17286254 | NM_153546 // Mboat1 // membrane bound O-acyltransferase domain containing 1 // 13 A3.2     | --- | Mboat1        | NM_153546         | 2.00 | 2.00  | 1.13  | 0        | 1 |
| 31958 | 17474454 | NM_001190491 // Dmpk // dystrophin myotonia-protein kinase // 7 A3 7 9.46 cM // 13400      | --- | Dmpk          | NM_001190491      | 2.00 | 2.00  | 1.25  | 0        | 1 |
| 3527  | 17207157 | ---                                                                                        | --- | ---           | ---               | 2.00 | 2.00  | 2.33  | 0        | 1 |
| 2241  | 17204537 | ---                                                                                        | --- | ---           | ---               | 2.00 | 2.00  | 6.65  | 0        | 1 |
| 734   | 17201469 | ---                                                                                        | --- | ---           | ---               | 2.00 | 2.00  | 1.07  | 0        | 1 |
| 546   | 17201089 | ---                                                                                        | --- | ---           | ---               | 2.00 | 2.00  | 2.23  | 1.14E-13 | 1 |
| 8006  | 17238736 | ENSMUST00000158767 // Gm23023 // predicted gene, 23023 // --- // ---                       | --- | Gm23023       | VSMUST00000158767 | 2.00 | 2.00  | 0.59  | 2.13E-14 | 1 |
| 39389 | 17545353 | NM_001199246 // Maged2 // melanoma antigen, family D, 2 // X X F2 // 80884 // NM_03070     | --- | Maged2        | NM_001199246      | 2.00 | 2.00  | 7.00  | 0        | 1 |
| 8850  | 17247078 | ENSMUST00000104336 // n-R5s67 // nuclear encoded rRNA 5S 67 // --- // ---                  | --- | n-R5s67       | VSMUST00000104336 | 2.00 | 2.00  | 2.01  | 1.42E-14 | 1 |
| 41114 | 17550504 | NR_033430 // Gm2694 // predicted gene 2694 // 8 C3 8 // 100040294 // ENSMUST0000018080     | --- | Gm2694        | NR_033430         | 2.00 | 2.00  | 0.86  | 0        | 1 |
| 18806 | 17342991 | ENSMUST00000122683 // Gm23887 // predicted gene, 23887 // --- // ---                       | --- | Gm23887       | VSMUST00000122683 | 2.00 | 2.00  | 8.14  | 5.68E-14 | 1 |
| 31893 | 17473854 | NM_134226 // Vmn1r89 // vomeronasal 1 receptor 89 // 7 A1 7 // 171260 // XM_006539587      | --- | Vmn1r89       | NM_134226         | 0.50 | -2.00 | 0.97  | 2.84E-14 | 1 |
| 39561 | 17546563 | XM_006542015 // LOC102635000 // uncharacterized LOC102635000 // --- // 102635000           | --- | LOC102635000  | XM_006542015      | 0.50 | -2.00 | 1.25  | 0        | 1 |
| 39579 | 17546635 | XM_006542015 // LOC102635000 // uncharacterized LOC102635000 // --- // 102635000           | --- | LOC102635000  | XM_006542015      | 0.50 | -2.00 | 1.25  | 0        | 1 |
| 39611 | 17546753 | XM_006542015 // LOC102635000 // uncharacterized LOC102635000 // --- // 102635000 // XM     | --- | LOC102635000  | XM_006542015      | 0.50 | -2.00 | 1.24  | 0        | 1 |
| 2528  | 17205117 | ---                                                                                        | --- | ---           | ---               | 0.50 | -2.00 | 5.99  | 5.68E-14 | 1 |
| 4580  | 17209307 | ---                                                                                        | --- | ---           | ---               | 0.50 | -2.00 | 5.99  | 5.68E-14 | 1 |
| 39740 | 17547380 | ---                                                                                        | --- | ---           | ---               | 0.50 | -2.00 | 0.89  | 0        | 1 |
| 856   | 17201717 | ---                                                                                        | --- | ---           | ---               | 0.50 | -2.00 | 2.21  | 0        | 1 |
| 942   | 17201893 | ---                                                                                        | --- | ---           | ---               | 0.50 | -2.00 | 2.21  | 0        | 1 |
| 24299 | 17397738 | ENSMUST00000082970 // Gm25404 // predicted gene, 25404 // --- // ---                       | --- | Gm25404       | VSMUST00000082970 | 0.50 | -2.00 | 0.73  | 4.26E-14 | 1 |
| 26686 | 17421413 | ---                                                                                        | --- | ---           | ---               | 0.50 | -2.00 | 2.89  | 0        | 1 |
| 30932 | 17464941 | ENSMUST00000104146 // Gm23013 // predicted gene, 23013 // --- // ---                       | --- | Gm23013       | VSMUST00000104146 | 0.50 | -2.00 | 0.94  | 0        | 1 |
| 29260 | 17448807 | ---                                                                                        | --- | ---           | ---               | 0.50 | -2.00 | 12.70 | 0        | 1 |
| 1564  | 17203155 | ---                                                                                        | --- | ---           | ---               | 0.50 | -2.00 | 0.94  | 5.68E-14 | 1 |
| 9485  | 17253476 | ---                                                                                        | --- | ---           | ---               | 0.50 | -2.01 | 6.35  | 0        | 1 |
| 40947 | 17549974 | ---                                                                                        | --- | ---           | ---               | 0.50 | -2.01 | 6.35  | 0        | 1 |
| 2190  | 17204431 | ---                                                                                        | --- | ---           | ---               | 0.50 | -2.01 | 6.52  | 5.68E-14 | 1 |
| 10588 | 17264946 | NM_009601 // Chrn1 // cholinergic receptor, nicotinic, beta polypeptide 1 (muscle) //      | --- | Chrn1         | NM_009601         | 0.50 | -2.01 | 2.47  | 2.84E-14 | 1 |
| 5820  | 17216525 | ENSMUST00000158066 // Gm22331 // predicted gene, 22331 // --- // ---                       | --- | Gm22331       | VSMUST00000158066 | 0.50 | -2.01 | 1.82  | 2.84E-14 | 1 |
| 28329 | 17439021 | NM_007950 // Ereg // ephrin A2 // 5 E1 5 // 13874 // ENSMUST00000031324 // Ereg // ep      | --- | Ereg          | NM_007950         | 0.50 | -2.01 | 7.68  | 1.14E-13 | 1 |
| 2032  | 17204115 | ---                                                                                        | --- | ---           | ---               | 0.50 | -2.01 | 5.83  | 5.68E-14 | 1 |
| 4355  | 17208847 | ---                                                                                        | --- | ---           | ---               | 0.50 | -2.01 | 0.67  | 0        | 1 |
| 40220 | 17548436 | NM_001122661 // Speer4e // spermatogenesis associated glutamate (E)-rich protein 4e //     | --- | Speer4e       | NM_001122661      | 0.50 | -2.01 | 1.62  | 0        | 1 |
| 4770  | 17209691 | ---                                                                                        | --- | ---           | ---               | 0.50 | -2.01 | 2.95  | 0        | 1 |
| 7557  | 17234433 | ---                                                                                        | --- | ---           | ---               | 0.50 | -2.01 | 3.00  | 2.27E-13 | 1 |
| 294   | 17200579 | ---                                                                                        | --- | ---           | ---               | 0.50 | -2.01 | 3.50  | 0        | 1 |
| 41012 | 17550244 | ---                                                                                        | --- | ---           | ---               | 0.50 | -2.01 | 1.31  | 2.84E-14 | 1 |
| 28983 | 17446524 | ENSMUST00000155721 // Speer4b // spermatogenesis associated glutamate (E)-rich protein     | --- | Speer4b       | VSMUST00000155721 | 0.50 | -2.01 | 1.63  | 0        | 1 |
| 1468  | 17202961 | ---                                                                                        | --- | ---           | ---               | 0.50 | -2.01 | 1.55  | 0        | 1 |
| 1543  | 17203113 | ---                                                                                        | --- | ---           | ---               | 0.50 | -2.02 | 0.82  | 5.68E-14 | 1 |
| 37826 | 17532106 | NR_033303 // Slc22a13b-ps // solute carrier family 22 (organic cation transporter), mem    | --- | Slc22a13b-ps  | NR_033303         | 0.50 | -2.02 | 0.98  | 5.68E-14 | 1 |
| 39679 | 17547170 | NM_001037748 // Gm20736 // predicted gene, 20736 // Y A1 Y // 380994 // NR_038299 // G     | --- | Gm20736       | NM_001037748      | 0.50 | -2.02 | 9.85  | 4.26E-14 | 1 |
| 39723 | 17547333 | NM_001037748 // Gm20736 // predicted gene, 20736 // Y A1 Y // 380994 // NR_038299 // G     | --- | Gm20736       | NM_001037748      | 0.50 | -2.02 | 9.85  | 4.26E-14 | 1 |
| 10097 | 17259745 | ENSMUST00000146218 // Gm12735 // predicted gene 12735 // --- // ---                        | --- | Gm12735       | VSMUST00000146218 | 0.50 | -2.02 | 2.86  | 1.42E-13 | 1 |
| 35006 | 17502525 | NR_039551 // Mir28b // microRNA 28b // 8 8 35.08 cM // 100628574 // ENSMUST00000175399     | --- | Mir28b        | NR_039551         | 0.50 | -2.02 | 4.07  | 1.14E-13 | 1 |
| 2656  | 17205379 | ---                                                                                        | --- | ---           | ---               | 0.50 | -2.02 | 1.70  | 2.84E-14 | 1 |
| 13748 | 17293695 | NM_025370 // Aaed1 // AhpC/TSA antioxidant enzyme domain containing 1 // 13 B3 13 // 66    | --- | Aaed1         | NM_025370         | 0.50 | -2.02 | 1.02  | 0        | 1 |
| 5128  | 17210419 | ---                                                                                        | --- | ---           | ---               | 0.50 | -2.02 | 2.68  | 0        | 1 |
| 8075  | 17239005 | NM_001170800 // Ipcef1 // interaction protein for cytohesin exchange factors 1 // 10 A1    | --- | Ipcef1        | NM_001170800      | 0.50 | -2.02 | 22.50 | 0        | 1 |
| 33320 | 17487529 | NM_001166836 // Vmn1r101 // vomeronasal 1 receptor 101 // 7 A3 7 // 100042968 // NM_00     | --- | Vmn1r101      | NM_001166836      | 0.50 | -2.02 | 1.64  | 2.84E-14 | 1 |
| 368   | 17200727 | ---                                                                                        | --- | ---           | ---               | 0.49 | -2.02 | 1.80  | 2.84E-14 | 1 |
| 33313 | 17487513 | NM_001166723 // Vmn1r94 // vomeronasal 1 receptor 94 // 7 A3 7 // 620537 // ENSMUST000     | --- | Vmn1r94       | NM_001166723      | 0.49 | -2.02 | 0.84  | 0        | 1 |
| 5976  | 17218321 | NM_011267 // Rgs16 // regulator of G-protein signaling 16 // 1 G3 1 65.43 cM // 19734 //   | --- | Rgs16         | NM_011267         | 0.49 | -2.02 | 2.80  | 1.42E-13 | 1 |
| 3030  | 17206141 | ---                                                                                        | --- | ---           | ---               | 0.49 | -2.03 | 2.41  | 0        | 1 |
| 30609 | 17461921 | ENSMUST00000158509 // Gm24767 // predicted gene, 24767 // --- // ---                       | --- | Gm24767       | VSMUST00000158509 | 0.49 | -2.03 | 0.60  | 1.42E-14 | 1 |
| 5955  | 17218040 | ENSMUST00000157698 // Gm25663 // predicted gene, 25663 // --- // ---                       | --- | Gm25663       | VSMUST00000157698 | 0.49 | -2.03 | 0.98  | 0        | 1 |
| 1030  | 17202071 | ---                                                                                        | --- | ---           | ---               | 0.49 | -2.03 | 5.78  | 2.84E-14 | 1 |
| 12497 | 17283942 | ---                                                                                        | --- | ---           | ---               | 0.49 | -2.03 | 1.62  | 0        | 1 |
| 3611  | 17207339 | ---                                                                                        | --- | ---           | ---               | 0.49 | -2.03 | 4.04  | 0        | 1 |

|       |          |                                                                                          |               |                   |      |       |       |          |   |
|-------|----------|------------------------------------------------------------------------------------------|---------------|-------------------|------|-------|-------|----------|---|
| 21427 | 17367947 | ENSMUST00000157546 // Gm25220 // predicted gene, 25220 // --- // ---                     | Gm25220       | VSMUST0000015754  | 0.49 | -2.03 | 2.50  | 0        | 1 |
| 33076 | 17485510 | NM_177363 // Tarm1 // T cell-interacting, activating receptor on myeloid cells 1 // 7 A  | Tarm1         | NM_177363         | 0.49 | -2.03 | 2.87  | 5.68E-14 | 1 |
| 3894  | 17207911 | ---                                                                                      | ---           | ---               | 0.49 | -2.03 | 2.69  | 1.71E-13 | 1 |
| 1523  | 17203073 | ---                                                                                      | ---           | ---               | 0.49 | -2.03 | 1.18  | 0        | 1 |
| 15633 | 17311329 | ---                                                                                      | ---           | ---               | 0.49 | -2.03 | 0.85  | 0        | 1 |
| 39774 | 17547475 | XM_006542015 // LOC102635000 // uncharacterized LOC102635000 // --- // 102635000 /// XM  | LOC102635000  | XM_006542015      | 0.49 | -2.03 | 1.22  | 5.68E-14 | 1 |
| 22425 | 17378327 | ---                                                                                      | ---           | ---               | 0.49 | -2.03 | 1.17  | 0        | 1 |
| 30200 | 17458345 | NM_001077410 // Gimap8 // GTPase, IMAP family member 8 // 6 B2.3 6 // 243374 /// NM_001  | Gimap8        | NM_001077410      | 0.49 | -2.03 | 26.65 | 0        | 1 |
| 29949 | 17456069 | XM_006544050 // Gm725 // predicted gene 725 // 6 A1 6 // 277899                          | Gm725         | XM_006544050      | 0.49 | -2.03 | 0.62  | 0        | 1 |
| 39727 | 17547344 | XM_006542396 // LOC102640767 // Y-linked testis-specific protein 1-like // --- // 10264  | LOC102640767  | XM_006542396      | 0.49 | -2.03 | 3.08  | 2.84E-14 | 1 |
| 33314 | 17487515 | NM_001166743 // Vmn1r117 // vomeronasal 1 receptor 117 // 7 A3 7 // 667262 /// ENSMUSTO  | Vmn1r117      | NM_001166743      | 0.49 | -2.03 | 1.91  | 0        | 1 |
| 33351 | 17487609 | NM_001166743 // Vmn1r117 // vomeronasal 1 receptor 117 // 7 A3 7 // 667262 /// ENSMUSTO  | Vmn1r117      | NM_001166743      | 0.49 | -2.03 | 1.91  | 0        | 1 |
| 1251  | 17202519 | ---                                                                                      | ---           | ---               | 0.49 | -2.03 | 2.79  | 8.53E-14 | 1 |
| 11531 | 17275123 | ---                                                                                      | ---           | ---               | 0.49 | -2.04 | 2.15  | 0        | 1 |
| 39733 | 17547360 | NM_207162 // Gm20738 // predicted gene, 20738 // Y C2 Y // 382133 /// ENSMUSTO000009684  | Gm20738       | NM_207162         | 0.49 | -2.04 | 1.10  | 0        | 1 |
| 1873  | 17203789 | ---                                                                                      | ---           | ---               | 0.49 | -2.04 | 3.18  | 0        | 1 |
| 3421  | 17206945 | ---                                                                                      | ---           | ---               | 0.49 | -2.04 | 0.66  | 0        | 1 |
| 5342  | 17210869 | NM_001159750 // Tcea1 // transcription elongation factor A (Slit) 1 // 1 A1 1 // 21399 / | Tcea1         | NM_001159750      | 0.49 | -2.04 | 2.93  | 0        | 1 |
| 84    | 17200155 | ---                                                                                      | ---           | ---               | 0.49 | -2.04 | 2.00  | 0        | 1 |
| 21624 | 17370437 | ENSMUST00000132692 // Dennd1a // DENN/MADD domain containing 1A // 2 B 2 // 227801       | Dennd1a       | VSMUST0000013269  | 0.49 | -2.04 | 2.82  | 2.84E-14 | 1 |
| 35598 | 17508949 | NM_019734 // Asah1 // N-acylsphingosine amidohydrolase 1 // 8 A4 8 // 11886 /// ENSMUST  | Asah1         | NM_019734         | 0.49 | -2.04 | 6.34  | 0        | 1 |
| 2223  | 17204501 | ---                                                                                      | ---           | ---               | 0.49 | -2.04 | 6.86  | 2.84E-14 | 1 |
| 33187 | 17486461 | ---                                                                                      | ---           | ---               | 0.49 | -2.04 | 1.38  | 0        | 1 |
| 38447 | 17537414 | XM_006528430 // LOC102634222 // serine/arginine repetitive matrix protein 1-like // ---  | LOC102634222  | XM_006528430      | 0.49 | -2.05 | 1.32  | 2.84E-14 | 1 |
| 38449 | 17537428 | XM_006528430 // LOC102634222 // serine/arginine repetitive matrix protein 1-like // ---  | LOC102634222  | XM_006528430      | 0.49 | -2.05 | 1.32  | 2.84E-14 | 1 |
| 38458 | 17537493 | XM_006528430 // LOC102634222 // serine/arginine repetitive matrix protein 1-like // ---  | LOC102634222  | XM_006528430      | 0.49 | -2.05 | 1.32  | 2.84E-14 | 1 |
| 29887 | 17455554 | NM_133898 // N4bp2l1 // NEDD4 binding protein 2-like 1 // 5 G3 5 // 100637 /// ENSMUSTO  | N4bp2l1       | NM_133898         | 0.49 | -2.05 | 4.71  | 0        | 1 |
| 25392 | 17408088 | ENSMUST00000077278 // Rpl21-ps11 // ribosomal protein L21, pseudogene 11 // --- // ---   | Rpl21-ps11    | VSMUST0000007727: | 0.49 | -2.05 | 0.77  | 0        | 1 |
| 3356  | 17206813 | ---                                                                                      | ---           | ---               | 0.49 | -2.05 | 1.55  | 2.84E-14 | 1 |
| 6112  | 17219475 | ---                                                                                      | ---           | ---               | 0.49 | -2.05 | 1.50  | 0        | 1 |
| 2227  | 17204509 | ---                                                                                      | ---           | ---               | 0.49 | -2.05 | 5.13  | 0        | 1 |
| 38655 | 17538833 | ---                                                                                      | ---           | ---               | 0.49 | -2.05 | 0.78  | 0        | 1 |
| 2098  | 17204247 | ---                                                                                      | ---           | ---               | 0.49 | -2.05 | 10.76 | 0        | 1 |
| 27128 | 17425978 | NM_001199995 // Mup12 // major urinary protein 12 // 4 B3 4 // 100039054 /// ENSMUSTO000 | Mup12         | NM_001199995      | 0.49 | -2.05 | 0.61  | 0        | 1 |
| 1466  | 17202957 | ---                                                                                      | ---           | ---               | 0.49 | -2.05 | 1.36  | 0        | 1 |
| 31681 | 17471828 | NM_001170851 // Klra2 // killer cell lectin-like receptor, subfamily A, member 2 // 6 F  | Klra2         | NM_001170851      | 0.49 | -2.05 | 6.75  | 0        | 1 |
| 20334 | 17357904 | NM_146692 // Olfr1454 // olfactory receptor 1454 // 19 C1 19 // 258687 /// ENSMUST000000 | Olfr1454      | NM_146692         | 0.49 | -2.05 | 1.86  | 0        | 1 |
| 39342 | 17545051 | NM_001033600 // Acsl4 // acyl-CoA synthetase long-chain family member 4 // X F2 X // 50  | Acsl4         | NM_001033600      | 0.49 | -2.05 | 1.74  | 0        | 1 |
| 17737 | 17332345 | ---                                                                                      | ---           | ---               | 0.49 | -2.05 | 1.28  | 0        | 1 |
| 39474 | 17546080 | ENSMUST00000102416 // Gm22368 // predicted gene, 22368 // --- // ---                     | Gm22368       | VSMUST0000010241: | 0.49 | -2.06 | 1.65  | 0        | 1 |
| 14995 | 17305167 | NM_001199122 // Ghitm // growth hormone inducible transmembrane protein // 14 B 14 21.2  | Ghitm         | NM_001199122      | 0.49 | -2.06 | 2.07  | 0        | 1 |
| 7209  | 17231301 | NM_013499 // Cr1 // complement component (3b/4b) receptor 1-like // 1 H6 1 98.43 cM //   | Cr1           | NM_013499         | 0.49 | -2.06 | 0.87  | 0        | 1 |
| 39356 | 17545225 | ENSMUST00000122472 // Gm25107 // predicted gene, 25107 // --- // ---                     | Gm25107       | VSMUST0000012247: | 0.49 | -2.06 | 5.18  | 0        | 1 |
| 39671 | 17547141 | XM_006542015 // LOC102635000 // uncharacterized LOC102635000 // --- // 102635000 /// XM  | LOC102635000  | XM_006542015      | 0.49 | -2.06 | 1.37  | 5.68E-14 | 1 |
| 39621 | 17546903 | ENSMUST00000104605 // Gm25565 // predicted gene, 25565 // --- // ---                     | Gm25565       | VSMUST0000010460: | 0.48 | -2.06 | 0.65  | 0        | 1 |
| 15404 | 17308794 | ENSMUST00000158740 // Gm23823 // predicted gene, 23823 // --- // ---                     | Gm23823       | VSMUST0000015874: | 0.48 | -2.06 | 3.39  | 0        | 1 |
| 38426 | 17537324 | NM_001276396 // Ube2dn1 // ubiquitin-conjugating enzyme E2D N-terminal like 1 // X E1    | Ube2dn1       | NM_001276396      | 0.48 | -2.06 | 1.91  | 2.84E-14 | 1 |
| 33754 | 17491537 | NR_002895 // Snord116 // small nucleolar RNA, C/D box 116 // 7 C 7 29.0 cM // 64243 ///  | Snord116      | NR_002895         | 0.48 | -2.06 | 5.39  | 0        | 1 |
| 33755 | 17491539 | NR_002895 // Snord116 // small nucleolar RNA, C/D box 116 // 7 C 7 29.0 cM // 64243 ///  | Snord116      | NR_002895         | 0.48 | -2.06 | 5.39  | 0        | 1 |
| 33758 | 17491566 | NR_002895 // Snord116 // small nucleolar RNA, C/D box 116 // 7 C 7 29.0 cM // 64243 ///  | Snord116      | NR_002895         | 0.48 | -2.06 | 5.39  | 0        | 1 |
| 33760 | 17491570 | NR_002895 // Snord116 // small nucleolar RNA, C/D box 116 // 7 C 7 29.0 cM // 64243 ///  | Snord116      | NR_002895         | 0.48 | -2.06 | 5.39  | 0        | 1 |
| 33761 | 17491572 | NR_002895 // Snord116 // small nucleolar RNA, C/D box 116 // 7 C 7 29.0 cM // 64243 ///  | Snord116      | NR_002895         | 0.48 | -2.06 | 5.39  | 0        | 1 |
| 33762 | 17491574 | NR_002895 // Snord116 // small nucleolar RNA, C/D box 116 // 7 C 7 29.0 cM // 64243 ///  | Snord116      | NR_002895         | 0.48 | -2.06 | 5.39  | 0        | 1 |
| 33763 | 17491576 | NR_002895 // Snord116 // small nucleolar RNA, C/D box 116 // 7 C 7 29.0 cM // 64243 ///  | Snord116      | NR_002895         | 0.48 | -2.06 | 5.39  | 0        | 1 |
| 33764 | 17491578 | NR_002895 // Snord116 // small nucleolar RNA, C/D box 116 // 7 C 7 29.0 cM // 64243 ///  | Snord116      | NR_002895         | 0.48 | -2.06 | 5.39  | 0        | 1 |
| 33765 | 17491580 | NR_002895 // Snord116 // small nucleolar RNA, C/D box 116 // 7 C 7 29.0 cM // 64243 ///  | Snord116      | NR_002895         | 0.48 | -2.06 | 5.39  | 0        | 1 |
| 33766 | 17491582 | NR_002895 // Snord116 // small nucleolar RNA, C/D box 116 // 7 C 7 29.0 cM // 64243 ///  | Snord116      | NR_002895         | 0.48 | -2.06 | 5.39  | 0        | 1 |
| 33767 | 17491584 | NR_002895 // Snord116 // small nucleolar RNA, C/D box 116 // 7 C 7 29.0 cM // 64243 ///  | Snord116      | NR_002895         | 0.48 | -2.06 | 5.39  | 0        | 1 |
| 33768 | 17491586 | NR_002895 // Snord116 // small nucleolar RNA, C/D box 116 // 7 C 7 29.0 cM // 64243 ///  | Snord116      | NR_002895         | 0.48 | -2.06 | 5.39  | 0        | 1 |
| 33769 | 17491588 | NR_002895 // Snord116 // small nucleolar RNA, C/D box 116 // 7 C 7 29.0 cM // 64243 ///  | Snord116      | NR_002895         | 0.48 | -2.06 | 5.39  | 0        | 1 |
| 33770 | 17491590 | NR_002895 // Snord116 // small nucleolar RNA, C/D box 116 // 7 C 7 29.0 cM // 64243 ///  | Snord116      | NR_002895         | 0.48 | -2.06 | 5.39  | 0        | 1 |
| 33771 | 17491592 | NR_002895 // Snord116 // small nucleolar RNA, C/D box 116 // 7 C 7 29.0 cM // 64243 ///  | Snord116      | NR_002895         | 0.48 | -2.06 | 5.39  | 0        | 1 |
| 33772 | 17491594 | NR_002895 // Snord116 // small nucleolar RNA, C/D box 116 // 7 C 7 29.0 cM // 64243 ///  | Snord116      | NR_002895         | 0.48 | -2.06 | 5.39  | 0        | 1 |
| 2097  | 17204245 | ---                                                                                      | ---           | ---               | 0.48 | -2.06 | 9.55  | 5.68E-14 | 1 |
| 39776 | 17547484 | XM_006542015 // LOC102635000 // uncharacterized LOC102635000 // --- // 102635000 /// XM  | LOC102635000  | XM_006542015      | 0.48 | -2.07 | 1.24  | 0        | 1 |
| 18746 | 17342306 | ENSMUST00000180010 // Gm22645 // predicted gene, 22645 // --- // ---                     | Gm22645       | VSMUST000001800:  | 0.48 | -2.07 | 7.79  | 4.26E-14 | 1 |
| 33311 | 17487509 | ENSMUST00000079099 // Gm16451 // predicted pseudogene 16451 // 7 A3 7 // 100043033 ///   | Gm16451       | VSMUST000000790:  | 0.48 | -2.07 | 1.24  | 0        | 1 |
| 33348 | 17487603 | ENSMUST00000079099 // Gm16451 // predicted pseudogene 16451 // 7 A3 7 // 100043033 ///   | Gm16451       | VSMUST000000790:  | 0.48 | -2.07 | 1.24  | 0        | 1 |
| 4997  | 17210151 | ---                                                                                      | ---           | ---               | 0.48 | -2.07 | 4.19  | 1.14E-13 | 1 |
| 29691 | 17453130 | ---                                                                                      | ---           | ---               | 0.48 | -2.07 | 1.60  | 1.14E-13 | 1 |
| 9890  | 17257565 | ---                                                                                      | ---           | ---               | 0.48 | -2.07 | 2.09  | 1.14E-13 | 1 |
| 39707 | 17547271 | BC087891 // Gm20852 // predicted gene, 20852 // Y Y // 100040786 /// NM_001017394 // Gm  | Gm20852       | BC087891          | 0.48 | -2.07 | 4.46  | 0        | 1 |
| 16186 | 17317031 | NM_177225 // Samd12 // sterile alpha motif domain containing 12 // 15 C-D 15 // 320679   | Samd12        | NM_177225         | 0.48 | -2.07 | 1.76  | 0        | 1 |
| 41099 | 17550474 | AK037717 // A130040M12Rik // RIKEN cDNA A130040M12 gene // 11 C 11 // 319269             | A130040M12Rik | AK037717          | 0.48 | -2.07 | 24.79 | 1.14E-13 | 1 |
| 1602  | 17203233 | ---                                                                                      | ---           | ---               | 0.48 | -2.07 | 0.73  | 2.84E-14 | 1 |
| 28387 | 17439530 | ENSMUST00000104236 // Gm24279 // predicted gene, 24279 // --- // ---                     | Gm24279       | VSMUST000001042:  | 0.48 | -2.07 | 6.01  | 0        | 1 |
| 4339  | 17208815 | ---                                                                                      | ---           | ---               | 0.48 | -2.07 | 3.30  | 0        | 1 |
| 26018 | 17414738 | NM_013623 // Orm3 // orosomuoid 3 // 4 C1 4 33.96 cM // 18407 /// ENSMUST0000006687 //   | Orm3          | NM_013623         | 0.48 | -2.07 | 1.80  | 0        | 1 |
| 822   | 17201649 | ---                                                                                      | ---           | ---               | 0.48 | -2.07 | 1.11  | 0        | 1 |
| 1888  | 17203819 | ---                                                                                      | ---           | ---               | 0.48 | -2.07 | 8.86  | 8.53E-14 | 1 |
| 10350 | 17262337 | ---                                                                                      | ---           | ---               | 0.48 | -2.08 | 2.63  | 0        | 1 |
| 25688 | 17411420 | NM_145953 // Cth // cystathionase (cystathionine gamma-lyase) // 3 H4 3 // 107869 /// E  | Cth           | NM_145953         | 0.48 | -2.08 | 5.72  | 1.71E-13 | 1 |
| 12555 | 17284362 | ENSMUST00000178909 // Ighd5-8 // immunoglobulin heavy diversity 5-8 // --- // ---        | Ighd5-8       | VSMUST000001789:  | 0.48 | -2.08 | 2.04  | 0        | 1 |
| 4508  | 17209163 | ---                                                                                      | ---           | ---               | 0.48 | -2.08 | 2.85  | 0        | 1 |
| 651   | 17201301 | ---                                                                                      | ---           | ---               | 0.48 | -2.08 | 1.88  | 2.84E-14 | 1 |
| 4360  | 17208857 | ---                                                                                      | ---           | ---               | 0.48 | -2.08 | 2.73  | 1.42E-14 | 1 |
| 25934 | 17413940 | ENSMUST00000158724 // Gm22670 // predicted gene, 22670 // --- // ---                     | Gm22670       | VSMUST000001587:  | 0.48 | -2.08 | 0.81  | 0        | 1 |
| 6800  | 17226618 | XR_398829 // LOC102641333 // uncharacterized LOC102641333 // --- // 102641333 /// ENSMU  | LOC102641333  | XR_398829         | 0.48 | -2.08 | 12.82 | 0        | 1 |
| 3758  | 17207639 | ---                                                                                      | ---           | ---               | 0.48 | -2.08 | 3.28  | 5.68E-14 | 1 |
| 38628 | 17538805 | ---                                                                                      | ---           | ---               | 0.48 | -2.08 | 1.03  | 0        | 1 |
| 39570 | 17546597 | XM_006542344 // Gm20736 // predicted gene, 20736 // Y A1 Y // 380994 /// NM_001037748 // | Gm20736       | XM_006542344      | 0.48 | -2.08 | 2.86  | 0        | 1 |
| 1149  | 17202315 | ---                                                                                      | ---           | ---               | 0.48 | -2.08 | 1.92  | 0        | 1 |
| 35421 | 17507321 | NM_010111 // Efnb2 // ephrin B2 // 8 A1.1 8 3.42 cM // 13642 /// ENSMUST00000001319 //   | Efnb2         | NM_010111         | 0.48 | -2.08 | 2.95  | 0        | 1 |
| 38455 | 17537464 | XM_006528462 // LOC102637761 // serine/arginine repetitive matrix protein 1-like // ---  | LOC102637761  | XM_006528462      | 0.48 | -2.08 | 2.61  | 0        | 1 |
| 10422 | 17262836 | ENSMUST00000135903 // Cdc42e2 // CDC42 small effector 2 // 11 B1.3 11 // 72729 /// ENS   | Cdc42e2       | VSMUST000001359:  | 0.48 | -2.08 | 5.87  | 0        | 1 |



|       |          |                                                                                         |               |                  |      |       |       |          |   |
|-------|----------|-----------------------------------------------------------------------------------------|---------------|------------------|------|-------|-------|----------|---|
| 16661 | 17322355 | NM_030720 // Gpr84 // G protein-coupled receptor 84 // 15 F3 15 // 80910 /// XM_0065215 | Gpr84         | NM_030720        | 0.48 | -2.09 | 1.03  | 2.84E-14 | 1 |
| 2178  | 17204407 | ---                                                                                     | ---           | ---              | 0.48 | -2.09 | 4.08  | 0        | 1 |
| 29985 | 17456478 | ENSMUST00000157766 // Gm26310 // predicted gene, 26310 // --- // ---                    | Gm26310       | VSMUST0000015776 | 0.48 | -2.09 | 0.89  | 0        | 1 |
| 39426 | 17545595 | NM_001291865 // Sat1 // spermidine/spermine N1-acetyl transferase 1 // X F3-F4 X 72.38  | Sat1          | NM_001291865     | 0.48 | -2.09 | 1.49  | 0        | 1 |
| 36140 | 17514349 | ENSMUST00000099056 // Gm10717 // predicted gene 10717 // --- // --- ENSMUST00000179     | Gm10717       | VSMUST0000009905 | 0.48 | -2.09 | 1.37  | 0        | 1 |
| 39259 | 17544316 | XM_006528435 // Astx // amplified spermatogenic transcripts X encoded // --- // 1001133 | Astx          | XM_006528435     | 0.48 | -2.09 | 6.10  | 7.11E-14 | 1 |
| 29417 | 17449827 | ---                                                                                     | ---           | ---              | 0.48 | -2.09 | 0.88  | 2.84E-14 | 1 |
| 26683 | 17421392 | ENSMUST00000123460 // Gm13235 // predicted gene 13235 // --- // ---                     | Gm13235       | VSMUST0000012346 | 0.48 | -2.09 | 1.20  | 0        | 1 |
| 33196 | 17486515 | XR_391308 // Gm6929 // predicted gene 6929 // 7 A1 7 // 628898                          | Gm6929        | XR_391308        | 0.48 | -2.09 | 0.86  | 0        | 1 |
| 4876  | 17209905 | ---                                                                                     | ---           | ---              | 0.48 | -2.09 | 7.40  | 2.84E-14 | 1 |
| 40612 | 17549272 | ---                                                                                     | ---           | ---              | 0.48 | -2.09 | 3.27  | 5.68E-14 | 1 |
| 1571  | 17203169 | ---                                                                                     | ---           | ---              | 0.48 | -2.09 | 1.40  | 0        | 1 |
| 3311  | 17206721 | ---                                                                                     | ---           | ---              | 0.48 | -2.09 | 0.95  | 2.84E-14 | 1 |
| 773   | 17201549 | ---                                                                                     | ---           | ---              | 0.48 | -2.09 | 1.01  | 0        | 1 |
| 18962 | 17344578 | ---                                                                                     | ---           | ---              | 0.48 | -2.09 | 1.17  | 5.68E-14 | 1 |
| 18185 | 17337152 | ---                                                                                     | ---           | ---              | 0.48 | -2.09 | 8.75  | 5.68E-14 | 1 |
| 3333  | 17206767 | ---                                                                                     | ---           | ---              | 0.48 | -2.10 | 1.91  | 0        | 1 |
| 33857 | 17492064 | ENSMUST00000103978 // Gm24120 // predicted gene, 24120 // --- // ---                    | Gm24120       | VSMUST0000010397 | 0.48 | -2.10 | 1.31  | 7.11E-15 | 1 |
| 1760  | 17203557 | ---                                                                                     | ---           | ---              | 0.48 | -2.10 | 5.69  | 2.84E-14 | 1 |
| 29849 | 17455193 | ---                                                                                     | ---           | ---              | 0.48 | -2.10 | 0.92  | 0        | 1 |
| 33330 | 17487554 | NM_001166743 // Vmn1r117 // vomeronasal 1 receptor 117 // 7 A3 7 // 667262 /// ENSMUST0 | Vmn1r117      | NM_001166743     | 0.48 | -2.10 | 2.04  | 2.84E-14 | 1 |
| 35685 | 17509758 | NM_001252623 // Csgalnact1 // chondroitin sulfate N-acetylgalactosaminyltransferase 1 / | Csgalnact1    | NM_001252623     | 0.48 | -2.10 | 4.81  | 1.99E-13 | 1 |
| 5989  | 17218427 | ---                                                                                     | ---           | ---              | 0.48 | -2.10 | 1.20  | 2.84E-14 | 1 |
| 5211  | 17210587 | ---                                                                                     | ---           | ---              | 0.48 | -2.10 | 4.33  | 1.71E-13 | 1 |
| 32002 | 17474765 | NM_001166739 // Vmn1r128 // vomeronasal 1 receptor 128 // 7 A3 7 // 667199 /// NM_00116 | Vmn1r128      | NM_001166739     | 0.48 | -2.10 | 2.13  | 0        | 1 |
| 32013 | 17474801 | NM_001166739 // Vmn1r128 // vomeronasal 1 receptor 128 // 7 A3 7 // 667199 /// NM_00116 | Vmn1r128      | NM_001166739     | 0.48 | -2.10 | 2.13  | 0        | 1 |
| 5126  | 17210415 | ---                                                                                     | ---           | ---              | 0.48 | -2.10 | 3.62  | 0        | 1 |
| 36137 | 17514340 | ENSMUST00000099046 // Gm10718 // predicted gene 10718 // --- // ---                     | Gm10718       | VSMUST0000009904 | 0.48 | -2.10 | 1.56  | 0        | 1 |
| 2906  | 17205887 | ---                                                                                     | ---           | ---              | 0.48 | -2.10 | 1.29  | 2.84E-14 | 1 |
| 26217 | 17416753 | ---                                                                                     | ---           | ---              | 0.48 | -2.10 | 2.70  | 0        | 1 |
| 32689 | 17481252 | NM_147118 // Olfr635 // olfactory receptor 635 // 7 E3 7 // 259122 /// ENSMUST000000981 | Olfr635       | NM_147118        | 0.48 | -2.11 | 1.31  | 0        | 1 |
| 29976 | 17456379 | ENSMUST00000180080 // Gm25942 // predicted gene, 25942 // --- // ---                    | Gm25942       | VSMUST0000018008 | 0.47 | -2.11 | 1.84  | 1.42E-14 | 1 |
| 2812  | 17205695 | ---                                                                                     | ---           | ---              | 0.47 | -2.11 | 8.40  | 2.84E-14 | 1 |
| 32111 | 17475429 | ENSMUST00000180343 // Gm25947 // predicted gene, 25947 // --- // ---                    | Gm25947       | VSMUST0000018034 | 0.47 | -2.11 | 1.17  | 1.14E-13 | 1 |
| 7919  | 17237978 | NM_001290183 // Ddit3 // DNA-damage inducible transcript 3 // 10 D3 10 // 13198 /// NM_ | Ddit3         | NM_001290183     | 0.47 | -2.11 | 12.42 | 5.68E-14 | 1 |
| 21297 | 17366894 | NR_030572 // Mir467d // microRNA 467d // 2 2 // 100124447 /// ENSMUST00000103833 // Mir | Mir467d       | NR_030572        | 0.47 | -2.11 | 2.34  | 0        | 1 |
| 3185  | 17206457 | ---                                                                                     | ---           | ---              | 0.47 | -2.11 | 2.40  | 0        | 1 |
| 20210 | 17357220 | ---                                                                                     | ---           | ---              | 0.47 | -2.11 | 1.32  | 0        | 1 |
| 36081 | 17513713 | NM_001037298 // Piezo1 // piezo-type mechanosensitive ion channel component 1 // 8 E1 8 | Piezo1        | NM_001037298     | 0.47 | -2.11 | 2.58  | 0        | 1 |
| 1476  | 17202977 | ---                                                                                     | ---           | ---              | 0.47 | -2.11 | 2.06  | 1.14E-13 | 1 |
| 140   | 17200267 | ---                                                                                     | ---           | ---              | 0.47 | -2.11 | 1.16  | 7.11E-15 | 1 |
| 1294  | 17202607 | ---                                                                                     | ---           | ---              | 0.47 | -2.11 | 4.13  | 0        | 1 |
| 32323 | 17477306 | NM_010116 // Klk1b9 // kallikrein 1-related peptidase b9 // 7 B4 7 28.45 cM // 13648 // | Klk1b9        | NM_010116        | 0.47 | -2.11 | 0.77  | 0        | 1 |
| 1978  | 17204007 | ---                                                                                     | ---           | ---              | 0.47 | -2.11 | 9.26  | 1.42E-14 | 1 |
| 398   | 17200787 | ---                                                                                     | ---           | ---              | 0.47 | -2.11 | 3.50  | 5.68E-14 | 1 |
| 148   | 17200283 | ---                                                                                     | ---           | ---              | 0.47 | -2.12 | 0.76  | 0        | 1 |
| 10358 | 17262345 | ---                                                                                     | ---           | ---              | 0.47 | -2.12 | 2.32  | 0        | 1 |
| 35527 | 17508170 | NM_026931 // 1810011010Rik // RIKEN cDNA 1810011010 gene // 8 A2 8 // 69068 /// ENSMUST | 1810011010Rik | NM_026931        | 0.47 | -2.12 | 14.22 | 5.68E-14 | 1 |
| 39768 | 17547456 | NM_001017394 // Gm20815 // predicted gene, 20815 // Y B Y // 100039753 /// NM_001025241 | Gm20815       | NM_001017394     | 0.47 | -2.12 | 3.94  | 0        | 1 |
| 4990  | 17210137 | ---                                                                                     | ---           | ---              | 0.47 | -2.12 | 4.90  | 1.42E-14 | 1 |
| 30479 | 17460580 | ---                                                                                     | ---           | ---              | 0.47 | -2.12 | 1.03  | 5.68E-14 | 1 |
| 3394  | 17206889 | ---                                                                                     | ---           | ---              | 0.47 | -2.12 | 4.45  | 2.84E-14 | 1 |
| 4951  | 17210057 | ---                                                                                     | ---           | ---              | 0.47 | -2.12 | 9.25  | 1.42E-14 | 1 |
| 40828 | 17549714 | ---                                                                                     | ---           | ---              | 0.47 | -2.12 | 3.95  | 4.26E-14 | 1 |
| 25943 | 17414038 | ENSMUST00000104229 // Gm23746 // predicted gene, 23746 // --- // ---                    | Gm23746       | VSMUST000001042; | 0.47 | -2.12 | 1.72  | 0        | 1 |
| 15424 | 17308963 | ENSMUST00000082473 // Gm23926 // predicted gene, 23926 // --- // ---                    | Gm23926       | VSMUST000000824; | 0.47 | -2.13 | 1.05  | 2.84E-14 | 1 |
| 2156  | 17204363 | ---                                                                                     | ---           | ---              | 0.47 | -2.13 | 2.68  | 5.68E-14 | 1 |
| 39696 | 17547229 | NM_207162 // Gm20738 // predicted gene, 20738 // Y C2 Y // 382133 /// ENSMUST0000017766 | Gm20738       | NM_207162        | 0.47 | -2.13 | 3.86  | 2.84E-14 | 1 |
| 39763 | 17547443 | NM_207162 // Gm20738 // predicted gene, 20738 // Y C2 Y // 382133 /// ENSMUST0000017766 | Gm20738       | NM_207162        | 0.47 | -2.13 | 3.86  | 2.84E-14 | 1 |
| 39765 | 17547450 | NM_207162 // Gm20738 // predicted gene, 20738 // Y C2 Y // 382133 /// ENSMUST0000017766 | Gm20738       | NM_207162        | 0.47 | -2.13 | 3.86  | 2.84E-14 | 1 |
| 37462 | 17527977 | NM_033320 // Glce // glucuronyl C5-epimerase // 9 C-D 9 // 93683 /// ENSMUST00000034785 | Glce          | NM_033320        | 0.47 | -2.13 | 4.78  | 0        | 1 |
| 39719 | 17547315 | XM_006542015 // LOC102635000 // uncharacterized LOC102635000 // --- // 102635000 /// XM | LOC102635000  | XM_006542015     | 0.47 | -2.13 | 1.88  | 1.14E-13 | 1 |
| 1582  | 17203191 | ---                                                                                     | ---           | ---              | 0.47 | -2.13 | 1.54  | 0        | 1 |
| 21368 | 17367446 | ENSMUST00000158847 // Gm25368 // predicted gene, 25368 // --- // ---                    | Gm25368       | VSMUST0000015884 | 0.47 | -2.13 | 0.90  | 5.68E-14 | 1 |
| 39700 | 17547246 | NM_207162 // Gm20738 // predicted gene, 20738 // Y C2 Y // 382133 /// ENSMUST0000017766 | Gm20738       | NM_207162        | 0.47 | -2.13 | 3.62  | 0        | 1 |
| 404   | 17200799 | ---                                                                                     | ---           | ---              | 0.47 | -2.13 | 3.07  | 2.84E-14 | 1 |
| 1414  | 17202851 | ---                                                                                     | ---           | ---              | 0.47 | -2.13 | 2.93  | 0        | 1 |
| 39218 | 17543974 | NM_001190409 // Magt1 // magnesium transporter 1 // X D X // 67075 /// NM_025952 // Mag | Magt1         | NM_001190409     | 0.47 | -2.13 | 1.13  | 0        | 1 |
| 24172 | 17396260 | NM_001276248 // Cp // ceruloplasmin // 3 3 D // 12870 /// NM_001276250 // Cp // cerulop | Cp            | NM_001276248     | 0.47 | -2.13 | 45.12 | 2.84E-13 | 1 |
| 12377 | 17282932 | ---                                                                                     | ---           | ---              | 0.47 | -2.13 | 0.89  | 0        | 1 |
| 1084  | 17202183 | ---                                                                                     | ---           | ---              | 0.47 | -2.13 | 2.17  | 2.13E-14 | 1 |
| 4872  | 17209897 | ---                                                                                     | ---           | ---              | 0.47 | -2.13 | 17.04 | 2.84E-14 | 1 |
| 9732  | 17256101 | NM_021347 // Gsdma // gasdermin A // 11 D 11 // 57911 /// XM_006533850 // Gsdma // gasd | Gsdma         | NM_021347        | 0.47 | -2.13 | 0.82  | 0        | 1 |
| 12615 | 17284530 | ENSMUST00000103505 // Ighv1-19 // immunoglobulin heavy variable V1-19 // 12 F2 12 // 38 | Ighv1-19      | VSMUST0000010350 | 0.47 | -2.13 | 99.41 | 2.27E-13 | 1 |
| 234   | 17200459 | ---                                                                                     | ---           | ---              | 0.47 | -2.14 | 1.36  | 8.53E-14 | 1 |
| 200   | 17200391 | ---                                                                                     | ---           | ---              | 0.47 | -2.14 | 1.27  | 0        | 1 |
| 11500 | 17274775 | NM_008482 // Lamb1 // laminin B1 // 12 A2-A3 12 13.39 cM // 16777 /// ENSMUST0000000297 | Lamb1         | NM_008482        | 0.47 | -2.14 | 29.82 | 2.27E-13 | 1 |
| 39711 | 17547283 | NM_207162 // Gm20738 // predicted gene, 20738 // Y C2 Y // 382133 /// ENSMUST0000017766 | Gm20738       | NM_207162        | 0.47 | -2.14 | 4.16  | 0        | 1 |
| 9095  | 17249260 | ENSMUST00000073543 // Olfr1375-ps1 // olfactory receptor 1375, pseudogene 1 // --- // - | Olfr1375-ps1  | VSMUST0000007354 | 0.47 | -2.14 | 1.01  | 0        | 1 |
| 39667 | 17547124 | ENSMUST00000180074 // LOC101056195 // uncharacterized LOC101056195 // --- // 101056195  | LOC101056195  | VSMUST0000018007 | 0.47 | -2.14 | 1.76  | 5.68E-14 | 1 |
| 4223  | 17208583 | ---                                                                                     | ---           | ---              | 0.47 | -2.14 | 5.69  | 4.26E-14 | 1 |
| 24256 | 17397373 | ENSMUST00000158626 // Gm25714 // predicted gene, 25714 // --- // ---                    | Gm25714       | VSMUST000001586; | 0.47 | -2.14 | 1.26  | 1.42E-14 | 1 |
| 1895  | 17203835 | ---                                                                                     | ---           | ---              | 0.47 | -2.14 | 7.36  | 4.26E-14 | 1 |
| 4949  | 17210053 | ---                                                                                     | ---           | ---              | 0.47 | -2.14 | 5.18  | 2.84E-14 | 1 |
| 5151  | 17210465 | ---                                                                                     | ---           | ---              | 0.47 | -2.15 | 0.95  | 0        | 1 |
| 31370 | 17468524 | ---                                                                                     | ---           | ---              | 0.47 | -2.15 | 1.24  | 0        | 1 |
| 1461  | 17202947 | ---                                                                                     | ---           | ---              | 0.46 | -2.15 | 2.06  | 5.68E-14 | 1 |
| 5331  | 17210835 | ---                                                                                     | ---           | ---              | 0.46 | -2.15 | 1.32  | 0        | 1 |
| 4922  | 17209997 | ---                                                                                     | ---           | ---              | 0.46 | -2.15 | 3.70  | 0        | 1 |
| 4711  | 17209573 | ---                                                                                     | ---           | ---              | 0.46 | -2.15 | 4.44  | 8.53E-14 | 1 |
| 7732  | 17236182 | NM_011595 // Timp3 // tissue inhibitor of metalloproteinase 3 // 10 C1-D1 10 42.83 cM / | Timp3         | NM_011595        | 0.46 | -2.15 | 57.37 | 4.55E-13 | 1 |
| 2407  | 17204873 | ---                                                                                     | ---           | ---              | 0.46 | -2.15 | 4.61  | 2.13E-14 | 1 |
| 17384 | 17329298 | NM_023794 // Etv5 // ets variant 5 // 16 B1 16 // 104156 /// ENSMUST00000079601 // Etv5 | Etv5          | NM_023794        | 0.46 | -2.16 | 2.46  | 0        | 1 |
| 4937  | 17210029 | ---                                                                                     | ---           | ---              | 0.46 | -2.16 | 2.23  | 0        | 1 |
| 33165 | 17486292 | ENSMUST00000166499 // Vmn2r44 // vomeronasal 2, receptor 44 // 7 A1 7 // 434113         | Vmn2r44       | VSMUST0000016649 | 0.46 | -2.16 | 3.28  | 7.11E-14 | 1 |

|       |          |                                                                                         |               |                   |             |       |        |          |   |
|-------|----------|-----------------------------------------------------------------------------------------|---------------|-------------------|-------------|-------|--------|----------|---|
| 34076 | 17494168 | NM_146314 // Olfr601 // olfactory receptor 601 // 7 E3 7 // 258311 /// ENSMUST00000804  | Olfr601       | NM_146314         | <b>0.46</b> | -2.16 | 0.73   | 0        | 1 |
| 618   | 17201233 | ---                                                                                     |               |                   | <b>0.46</b> | -2.16 | 1.95   | 5.68E-14 | 1 |
| 39396 | 17545418 | ENSMUST0000082731 // Gm24460 // predicted gene, 24460 // --- // ---                     | Gm24460       | VSMUST0000082731  | <b>0.46</b> | -2.16 | 2.06   | 0        | 1 |
| 33683 | 17490953 | ---                                                                                     |               |                   | <b>0.46</b> | -2.16 | 0.93   | 0        | 1 |
| 24240 | 17397170 | NM_011896 // Spry1 // sprouty homolog 1 (Drosophila) // 3 B 3 // 24063 /// XM_006535464 | Spry1         | NM_011896         | <b>0.46</b> | -2.16 | 3.24   | 5.68E-14 | 1 |
| 2026  | 17204103 | ---                                                                                     |               |                   | <b>0.46</b> | -2.16 | 2.35   | 0        | 1 |
| 12491 | 17283936 | ---                                                                                     |               |                   | <b>0.46</b> | -2.16 | 2.39   | 0        | 1 |
| 5251  | 17210671 | ---                                                                                     |               |                   | <b>0.46</b> | -2.16 | 2.97   | 5.68E-14 | 1 |
| 27184 | 17426695 | ---                                                                                     |               |                   | <b>0.46</b> | -2.16 | 2.11   | 2.84E-14 | 1 |
| 2822  | 17205715 | ---                                                                                     |               |                   | <b>0.46</b> | -2.16 | 2.03   | 2.84E-14 | 1 |
| 3094  | 17206271 | ---                                                                                     |               |                   | <b>0.46</b> | -2.16 | 2.83   | 1.42E-13 | 1 |
| 39750 | 17547402 | NM_207162 // Gm20738 // predicted gene, 20738 // Y C2 Y // 382133 /// ENSMUST0000017766 | Gm20738       | NM_207162         | <b>0.46</b> | -2.16 | 3.59   | 0        | 1 |
| 17784 | 17333036 | ENSMUST0000097423 // Rsph3a // radial spoke 3A homolog (Chlamydomonas) // 17 A1 17 //   | Rsph3a        | VSMUST0000097423  | <b>0.46</b> | -2.16 | 0.73   | 5.68E-14 | 1 |
| 16744 | 17323057 | NR_040574 // Pla2g10os // phospholipase A2, group X, opposite strand // 16 16 // 76684  | Pla2g10os     | NR_040574         | <b>0.46</b> | -2.16 | 6.37   | 0        | 1 |
| 4762  | 17209675 | ---                                                                                     |               |                   | <b>0.46</b> | -2.17 | 2.47   | 5.68E-14 | 1 |
| 7560  | 17234448 | ---                                                                                     |               |                   | <b>0.46</b> | -2.17 | 3.26   | 7.11E-14 | 1 |
| 11575 | 17275594 | ENSMUST00000103989 // Gm25760 // predicted gene, 25760 // --- // ---                    | Gm25760       | VSMUST00000103989 | <b>0.46</b> | -2.17 | 0.98   | 0        | 1 |
| 39694 | 17547223 | NM_207162 // Gm20738 // predicted gene, 20738 // Y C2 Y // 382133 /// ENSMUST0000017766 | Gm20738       | NM_207162         | <b>0.46</b> | -2.17 | 7.12   | 2.84E-14 | 1 |
| 39726 | 17547341 | NM_207162 // Gm20738 // predicted gene, 20738 // Y C2 Y // 382133 /// ENSMUST0000017766 | Gm20738       | NM_207162         | <b>0.46</b> | -2.17 | 7.12   | 2.84E-14 | 1 |
| 39738 | 17547375 | NM_207162 // Gm20738 // predicted gene, 20738 // Y C2 Y // 382133 /// ENSMUST0000017766 | Gm20738       | NM_207162         | <b>0.46</b> | -2.17 | 7.12   | 2.84E-14 | 1 |
| 39751 | 17547407 | NM_207162 // Gm20738 // predicted gene, 20738 // Y C2 Y // 382133 /// ENSMUST0000017766 | Gm20738       | NM_207162         | <b>0.46</b> | -2.17 | 7.12   | 2.84E-14 | 1 |
| 39752 | 17547410 | NM_207162 // Gm20738 // predicted gene, 20738 // Y C2 Y // 382133 /// ENSMUST0000017766 | Gm20738       | NM_207162         | <b>0.46</b> | -2.17 | 7.12   | 2.84E-14 | 1 |
| 29695 | 17453134 | ---                                                                                     |               |                   | <b>0.46</b> | -2.17 | 0.92   | 5.68E-14 | 1 |
| 500   | 17200995 | ---                                                                                     |               |                   | <b>0.46</b> | -2.17 | 1.89   | 1.42E-14 | 1 |
| 4305  | 17208747 | ---                                                                                     |               |                   | <b>0.46</b> | -2.17 | 1.01   | 0        | 1 |
| 23527 | 17389936 | ENSMUST0000082788 // Gm25857 // predicted gene, 25857 // --- // ---                     | Gm25857       | VSMUST0000082788  | <b>0.46</b> | -2.17 | 2.28   | 1.71E-13 | 1 |
| 25134 | 17405838 | NR_040556 // Gm6634 // predicted gene 6634 // 3 E2 3 // 625901 /// ENSMUST00000180497 / | Gm6634        | NR_040556         | <b>0.46</b> | -2.17 | 2.41   | 1.71E-13 | 1 |
| 28469 | 17440335 | NM_001104628 // Vmn2r17 // vomeronasal 2, receptor 17 // 5 F 5 // 384221 /// ENSMUST000 | Vmn2r17       | NM_001104628      | <b>0.46</b> | -2.17 | 1.04   | 4.26E-14 | 1 |
| 18279 | 17337852 | NM_172621 // Clic5 // chloride intracellular channel 5 // 17 17 C // 224796 /// XM_0065 | Clic5         | NM_172621         | <b>0.46</b> | -2.17 | 0.79   | 0        | 1 |
| 3393  | 17206887 | ---                                                                                     |               |                   | <b>0.46</b> | -2.17 | 1.59   | 1.14E-13 | 1 |
| 41139 | 17550556 | ENSMUST0000082387 // mt-Tf // mitochondrially encoded tRNA phenylalanine // --- // ---  | mt-Tf         | VSMUST0000082387  | <b>0.46</b> | -2.17 | 1.43   | 0        | 1 |
| 39607 | 17546743 | ---                                                                                     |               |                   | <b>0.46</b> | -2.17 | 1.71   | 0        | 1 |
| 17439 | 17329864 | NM_001145874 // Muc20 // mucin 20 // 16 B3 16 // 224116 /// NM_146071 // Muc20 // mucin | Muc20         | NM_001145874      | <b>0.46</b> | -2.18 | 1.21   | 2.84E-14 | 1 |
| 3165  | 17206413 | ---                                                                                     |               |                   | <b>0.46</b> | -2.18 | 2.27   | 0        | 1 |
| 931   | 17201871 | ---                                                                                     |               |                   | <b>0.46</b> | -2.18 | 4.13   | 1.42E-14 | 1 |
| 14927 | 17304155 | NM_001270503 // Plac9b // placenta specific 9b // 14 A3 14 // 100039246 /// NM_207229 / | Plac9b        | NM_001270503      | <b>0.46</b> | -2.18 | 2.11   | 1.14E-13 | 1 |
| 14929 | 17304170 | NM_001270503 // Plac9b // placenta specific 9b // 14 A3 14 // 100039246 /// NM_207229 / | Plac9b        | NM_001270503      | <b>0.46</b> | -2.18 | 2.11   | 1.14E-13 | 1 |
| 14180 | 17298654 | ENSMUST00000104424 // Gm25498 // predicted gene, 25498 // --- // ---                    | Gm25498       | VSMUST00000104424 | <b>0.46</b> | -2.18 | 0.80   | 0        | 1 |
| 12179 | 17280978 | ENSMUST00000158721 // Gm22663 // predicted gene, 22663 // --- // ---                    | Gm22663       | VSMUST00000158721 | <b>0.46</b> | -2.18 | 1.64   | 0        | 1 |
| 27783 | 17432749 | ---                                                                                     |               |                   | <b>0.46</b> | -2.18 | 6.05   | 4.26E-14 | 1 |
| 29097 | 17447696 | ENSMUST00000104085 // Gm22779 // predicted gene, 22779 // --- // ---                    | Gm22779       | VSMUST00000104085 | <b>0.46</b> | -2.18 | 1.54   | 5.68E-14 | 1 |
| 36135 | 17514333 | ENSMUST0000099049 // Gm10719 // predicted gene 10719 // --- // ---                      | Gm10719       | VSMUST0000099049  | <b>0.46</b> | -2.19 | 1.96   | 0        | 1 |
| 39663 | 17547101 | XM_006542015 // LOC102635000 // uncharacterized LOC102635000 // --- // 102635000 /// XM | LOC102635000  | XM_006542015      | <b>0.46</b> | -2.19 | 1.86   | 2.84E-14 | 1 |
| 39180 | 17543625 | NM_009910 // Cxcr3 // chemokine (C-X-C motif) receptor 3 // X D X 44.58 cM // 12766 /// | Cxcr3         | NM_009910         | <b>0.46</b> | -2.19 | 11.19  | 0        | 1 |
| 2505  | 17205071 | ---                                                                                     |               |                   | <b>0.46</b> | -2.19 | 3.00   | 0        | 1 |
| 2779  | 17205629 | ---                                                                                     |               |                   | <b>0.46</b> | -2.19 | 2.92   | 2.84E-14 | 1 |
| 4557  | 17209261 | ---                                                                                     |               |                   | <b>0.46</b> | -2.19 | 3.00   | 0        | 1 |
| 4181  | 17208497 | ---                                                                                     |               |                   | <b>0.46</b> | -2.19 | 1.54   | 5.68E-14 | 1 |
| 38445 | 17537401 | XM_006528462 // LOC102637761 // serine/arginine repetitive matrix protein 1-like // --- | LOC102637761  | XM_006528462      | <b>0.46</b> | -2.19 | 2.61   | 0        | 1 |
| 38451 | 17537442 | XM_006528462 // LOC102637761 // serine/arginine repetitive matrix protein 1-like // --- | LOC102637761  | XM_006528462      | <b>0.46</b> | -2.19 | 2.61   | 0        | 1 |
| 5727  | 17215576 | NM_001037136 // Agap1 // ArfGAP with GTPase domain, ankyrin repeat and PH domain 1 // 1 | Agap1         | NM_001037136      | <b>0.46</b> | -2.19 | 6.16   | 0        | 1 |
| 14021 | 17296723 | ENSMUST00000112787 // Gm3099 // predicted gene 3099 // 14 A1 14 // 100041019            | Gm3099        | VSMUST00000112787 | <b>0.46</b> | -2.19 | 1.13   | 0        | 1 |
| 28148 | 17437213 | NM_007646 // Cd38 // CD38 antigen // 5 B3 5 23.85 cM // 12494 /// ENSMUST0000030964 //  | Cd38          | NM_007646         | <b>0.46</b> | -2.19 | 10.61  | 5.68E-14 | 1 |
| 3705  | 17207531 | ---                                                                                     |               |                   | <b>0.46</b> | -2.19 | 1.30   | 0        | 1 |
| 2836  | 17205743 | ---                                                                                     |               |                   | <b>0.46</b> | -2.19 | 3.51   | 1.14E-13 | 1 |
| 2908  | 17205891 | ---                                                                                     |               |                   | <b>0.46</b> | -2.19 | 0.69   | 1.42E-14 | 1 |
| 38746 | 17539658 | NM_001287530 // Arhgap6 // Rho GTPase activating protein 6 // X F5 X // 11856 /// NM_00 | Arhgap6       | NM_001287530      | <b>0.46</b> | -2.19 | 2.67   | 1.14E-13 | 1 |
| 29240 | 17448784 | ---                                                                                     |               |                   | <b>0.46</b> | -2.20 | 7.06   | 0        | 1 |
| 31988 | 17474726 | NM_001166738 // Vmn1r104 // vomeronasal 1 receptor 104 // 7 A3 7 // 667135 /// NM_00116 | Vmn1r104      | NM_001166738      | <b>0.45</b> | -2.20 | 2.01   | 0        | 1 |
| 15854 | 17313583 | NM_010006 // Cyp2d9 // cytochrome P450, family 2, subfamily d, polypeptide 9 // 15 E1 1 | Cyp2d9        | NM_010006         | <b>0.45</b> | -2.20 | 2.83   | 7.11E-15 | 1 |
| 1504  | 17203033 | ---                                                                                     |               |                   | <b>0.45</b> | -2.21 | 1.70   | 5.68E-14 | 1 |
| 2019  | 17204089 | ---                                                                                     |               |                   | <b>0.45</b> | -2.21 | 14.19  | 0        | 1 |
| 12547 | 17284334 | ENSMUST00000103418 // Ighg2b // immunoglobulin heavy constant gamma 2B // --- // --- // | Ighg2b        | VSMUST00000103418 | <b>0.45</b> | -2.21 | 107.31 | 2.27E-13 | 1 |
| 4240  | 17208617 | ---                                                                                     |               |                   | <b>0.45</b> | -2.21 | 1.81   | 5.68E-14 | 1 |
| 33319 | 17487527 | NM_001166715 // Vmn1r120 // vomeronasal 1 receptor 120 // 7 A3 7 // 435953 /// ENSMUST0 | Vmn1r120      | NM_001166715      | <b>0.45</b> | -2.21 | 2.07   | 2.84E-14 | 1 |
| 33355 | 17487617 | NM_001166715 // Vmn1r120 // vomeronasal 1 receptor 120 // 7 A3 7 // 435953 /// ENSMUST0 | Vmn1r120      | NM_001166715      | <b>0.45</b> | -2.21 | 2.07   | 2.84E-14 | 1 |
| 1055  | 17202123 | ---                                                                                     |               |                   | <b>0.45</b> | -2.21 | 3.08   | 2.84E-14 | 1 |
| 23585 | 17390997 | NM_177608 // Secisbp2l // SECIS binding protein 2-like // 2 F1 2 // 70354 /// ENSMUST00 | Secisbp2l     | NM_177608         | <b>0.45</b> | -2.21 | 1.47   | 0        | 1 |
| 40989 | 17550136 | ---                                                                                     |               |                   | <b>0.45</b> | -2.21 | 2.81   | 0        | 1 |
| 19244 | 17347440 | NR_033463 // 4930429F11Rik // RIKEN cDNA 4930429F11 gene // 17 E3 17 // 74622           | 4930429F11Rik | NR_033463         | <b>0.45</b> | -2.21 | 0.73   | 0        | 1 |
| 39252 | 17544290 | ENSMUST00000180281 // Astx6 // amplified spermatogenic transcripts X encoded 6 // --- / | Astx6         | VSMUST00000180281 | <b>0.45</b> | -2.21 | 0.86   | 0        | 1 |
| 31375 | 17468530 | ---                                                                                     |               |                   | <b>0.45</b> | -2.22 | 0.92   | 0        | 1 |
| 39736 | 17547368 | NM_001017394 // Gm20815 // predicted gene, 20815 // Y B Y // 100039753 /// NM_023546 // | Gm20815       | NM_001017394      | <b>0.45</b> | -2.22 | 5.16   | 2.84E-14 | 1 |
| 39756 | 17547420 | NM_001017394 // Gm20815 // predicted gene, 20815 // Y B Y // 100039753 /// NM_023546 // | Gm20815       | NM_001017394      | <b>0.45</b> | -2.22 | 5.16   | 2.84E-14 | 1 |
| 3368  | 17206837 | ---                                                                                     |               |                   | <b>0.45</b> | -2.22 | 2.41   | 0        | 1 |
| 8767  | 17246388 | NM_001085477 // Olfr765 // olfactory receptor 765 // 10 D3 10 // 544748 /// ENSMUST0000 | Olfr765       | NM_001085477      | <b>0.45</b> | -2.22 | 0.82   | 0        | 1 |
| 1305  | 17202629 | ---                                                                                     |               |                   | <b>0.45</b> | -2.22 | 0.82   | 0        | 1 |
| 23574 | 17390823 | NM_001290993 // Slc30a4 // solute carrier family 30 (zinc transporter), member 4 // 2 E | Slc30a4       | NM_001290993      | <b>0.45</b> | -2.22 | 17.48  | 5.68E-14 | 1 |
| 26246 | 17417059 | ---                                                                                     |               |                   | <b>0.45</b> | -2.22 | 1.19   | 0        | 1 |
| 40671 | 17549398 | ---                                                                                     |               |                   | <b>0.45</b> | -2.23 | 1.14   | 2.84E-14 | 1 |
| 40862 | 17549784 | ---                                                                                     |               |                   | <b>0.45</b> | -2.23 | 1.14   | 2.84E-14 | 1 |
| 857   | 17201719 | ---                                                                                     |               |                   | <b>0.45</b> | -2.23 | 2.39   | 0        | 1 |
| 943   | 17201895 | ---                                                                                     |               |                   | <b>0.45</b> | -2.23 | 2.39   | 0        | 1 |
| 10356 | 17262343 | ---                                                                                     |               |                   | <b>0.45</b> | -2.23 | 0.74   | 5.68E-14 | 1 |
| 672   | 17201343 | ---                                                                                     |               |                   | <b>0.45</b> | -2.23 | 0.88   | 0        | 1 |
| 11380 | 17273562 | ENSMUST00000134226 // Gm12590 // predicted gene 12590 // --- // ---                     | Gm12590       | VSMUST00000134226 | <b>0.45</b> | -2.23 | 0.83   | 0        | 1 |
| 4368  | 17208873 | ---                                                                                     |               |                   | <b>0.45</b> | -2.23 | 1.38   | 0        | 1 |
| 5196  | 17210557 | ---                                                                                     |               |                   | <b>0.45</b> | -2.23 | 1.00   | 0        | 1 |
| 1508  | 17203041 | ---                                                                                     |               |                   | <b>0.45</b> | -2.23 | 0.74   | 5.68E-14 | 1 |
| 10957 | 17268808 | ENSMUST00000158598 // Gm25048 // predicted gene, 25048 // --- // ---                    | Gm25048       | VSMUST00000158598 | <b>0.45</b> | -2.23 | 1.32   | 0        | 1 |
| 36139 | 17514346 | ENSMUST0000099042 // Gm10717 // predicted gene 10717 // --- // ---                      | Gm10717       | VSMUST0000099042  | <b>0.45</b> | -2.24 | 1.07   | 0        | 1 |
| 33672 | 17490878 | NM_008654 // Ppp1r15a // protein phosphatase 1, regulatory (inhibitor) subunit 15A // 7 | Ppp1r15a      | NM_008654         | <b>0.45</b> | -2.24 | 2.55   | 5.68E-14 | 1 |
| 24898 | 17403846 | ENSMUST0000082576 // Gm22458 // predicted gene, 22458 // --- // ---                     | Gm22458       | VSMUST0000082576  | <b>0.45</b> | -2.24 | 2.60   | 0        | 1 |
| 29885 | 17455550 | ENSMUST00000180345 // Gm25284 // predicted gene, 25284 // --- // ---                    | Gm25284       | VSMUST00000180345 | <b>0.45</b> | -2.24 | 1.17   | 0        | 1 |
| 36552 | 17517812 | NM_011352 // Sema7a // sema domain, immunoglobulin domain (Ig), and GPI membrane anchor | Sema7a        | NM_011352         | <b>0.45</b> | -2.24 | 1.41   | 1.71E-13 | 1 |

|       |          |                                                                                         |              |                  |      |       |       |          |          |   |
|-------|----------|-----------------------------------------------------------------------------------------|--------------|------------------|------|-------|-------|----------|----------|---|
| 4486  | 17209119 | ---                                                                                     |              |                  | ---  | 0.45  | -2.24 | 2.12     | 5.68E-14 | 1 |
| 18005 | 17335129 | NM_001166537 // Hmga1 // high mobility group AT-hook 1 // 17 A3.3 17 14.5 cM // 15361 / | Hmga1        | NM_001166537     | 0.45 | -2.24 | 2.23  | 0        |          | 1 |
| 3997  | 17208121 | ---                                                                                     |              | ---              | 0.45 | -2.24 | 1.21  | 5.68E-14 | 1        | 1 |
| 29451 | 17450196 | ENSMUST00000142871 // Agpat9 // 1-acylglycerol-3-phosphate O-acyltransferase 9 // 5 E4  | Agpat9       | VSMUST0000014287 | 0.45 | -2.24 | 1.84  | 0        |          | 1 |
| 3202  | 17206493 | ---                                                                                     |              | ---              | 0.45 | -2.25 | 4.88  | 5.68E-14 | 1        | 1 |
| 11158 | 17270607 | ---                                                                                     |              | ---              | 0.45 | -2.25 | 1.66  | 5.68E-14 | 1        | 1 |
| 40952 | 17549988 | ---                                                                                     |              | ---              | 0.45 | -2.25 | 1.66  | 5.68E-14 | 1        | 1 |
| 1581  | 17203189 | ---                                                                                     |              | ---              | 0.44 | -2.25 | 0.83  | 0        |          | 1 |
| 10353 | 17262340 | ---                                                                                     |              | ---              | 0.44 | -2.25 | 1.62  | 0        |          | 1 |
| 2123  | 17204297 | ---                                                                                     |              | ---              | 0.44 | -2.25 | 7.57  | 8.53E-14 | 1        | 1 |
| 3288  | 17206673 | ---                                                                                     |              | ---              | 0.44 | -2.25 | 2.61  | 2.84E-14 | 1        | 1 |
| 15058 | 17305599 | ENSMUST00000168000 // Gm17173 // predicted gene 17173 // --- // ---                     | Gm17173      | VSMUST0000016800 | 0.44 | -2.25 | 3.88  | 0        |          | 1 |
| 13520 | 17291651 | ENSMUST00000083909 // Gm25186 // predicted gene, 25186 // --- // ---                    | Gm25186      | VSMUST0000008390 | 0.44 | -2.25 | 2.66  | 2.84E-14 | 1        | 1 |
| 1421  | 17202865 | ---                                                                                     |              | ---              | 0.44 | -2.25 | 2.82  | 5.68E-14 | 1        | 1 |
| 1687  | 17203405 | ---                                                                                     |              | ---              | 0.44 | -2.25 | 7.74  | 0        |          | 1 |
| 31200 | 17467368 | ENSMUST00000103306 // Igkv1-131 // immunoglobulin kappa variable 1-131 // --- // ---    | Igkv1-131    | VSMUST0000010330 | 0.44 | -2.25 | 8.59  | 5.68E-14 | 1        | 1 |
| 4484  | 17209115 | ---                                                                                     |              | ---              | 0.44 | -2.25 | 1.46  | 0        |          | 1 |
| 3961  | 17208049 | ---                                                                                     |              | ---              | 0.44 | -2.25 | 1.62  | 0        |          | 1 |
| 14468 | 17300181 | ENSMUST00000103706 // Traj35 // T cell receptor alpha joining 35 // --- // --- DQ18     | Traj35       | VSMUST0000010370 | 0.44 | -2.26 | 48.09 | 0        |          | 1 |
| 10364 | 17262352 | ---                                                                                     |              | ---              | 0.44 | -2.26 | 3.03  | 1.14E-13 | 1        | 1 |
| 39710 | 17547281 | NM_207162 // Gm20738 // predicted gene, 20738 // Y C2 Y // 382133 /// ENSMUST0000017766 | Gm20738      | NM_207162        | 0.44 | -2.26 | 3.49  | 2.84E-14 | 1        | 1 |
| 32951 | 17484095 | ---                                                                                     |              | ---              | 0.44 | -2.26 | 5.46  | 0        |          | 1 |
| 33323 | 17487535 | ENSMUST00000173886 // Gm8677 // predicted gene 8677 // 7 A3 7 // 667512 /// ENSMUST0000 | Gm8677       | VSMUST0000017388 | 0.44 | -2.26 | 1.84  | 0        |          | 1 |
| 33359 | 17487625 | ENSMUST00000173886 // Gm8677 // predicted gene 8677 // 7 A3 7 // 667512 /// ENSMUST0000 | Gm8677       | VSMUST0000017388 | 0.44 | -2.26 | 1.84  | 0        |          | 1 |
| 1561  | 17203149 | ---                                                                                     |              | ---              | 0.44 | -2.26 | 3.15  | 1.42E-14 | 1        | 1 |
| 3714  | 17207549 | ---                                                                                     |              | ---              | 0.44 | -2.26 | 1.96  | 2.84E-14 | 1        | 1 |
| 477   | 17200949 | ---                                                                                     |              | ---              | 0.44 | -2.27 | 1.88  | 5.68E-14 | 1        | 1 |
| 22323 | 17377454 | NM_001142410 // Gm14124 // predicted gene 14124 // 2 G3 2 // 100216455 /// ENSMUST00000 | Gm14124      | NM_001142410     | 0.44 | -2.27 | 7.57  | 0        |          | 1 |
| 2395  | 17204849 | ---                                                                                     |              | ---              | 0.44 | -2.27 | 1.57  | 5.68E-14 | 1        | 1 |
| 17118 | 17326706 | ENSMUST00000169531 // Gm17333 // predicted gene, 17333 // --- // ---                    | Gm17333      | VSMUST0000016953 | 0.44 | -2.27 | 0.76  | 7.11E-15 | 1        | 1 |
| 22145 | 17375503 | ENSMUST00000047498 // AA467197 // expressed sequence AA467197 // 2 E5 2 // 433470 /// N | AA467197     | VSMUST0000004749 | 0.44 | -2.27 | 12.94 | 2.84E-13 | 1        | 1 |
| 22289 | 17377164 | ENSMUST00000145579 // Gm14093 // predicted gene 14093 // --- // ---                     | Gm14093      | VSMUST0000014557 | 0.44 | -2.27 | 2.16  | 0        |          | 1 |
| 2037  | 17204125 | ---                                                                                     |              | ---              | 0.44 | -2.27 | 3.98  | 5.68E-14 | 1        | 1 |
| 2689  | 17205447 | ---                                                                                     |              | ---              | 0.44 | -2.27 | 3.72  | 0        |          | 1 |
| 11472 | 17274492 | ENSMUST00000102225 // Gm24938 // predicted gene, 24938 // --- // --- ENSMUST0000010     | Gm24938      | VSMUST0000010222 | 0.44 | -2.27 | 4.80  | 0        |          | 1 |
| 11473 | 17274494 | ENSMUST00000102225 // Gm24938 // predicted gene, 24938 // --- // --- ENSMUST0000010     | Gm24938      | VSMUST0000010222 | 0.44 | -2.27 | 4.80  | 0        |          | 1 |
| 32289 | 17477016 | ENSMUST00000102225 // Gm24938 // predicted gene, 24938 // --- // --- ENSMUST0000010     | Gm24938      | VSMUST0000010222 | 0.44 | -2.27 | 4.80  | 0        |          | 1 |
| 1172  | 17202361 | ---                                                                                     |              | ---              | 0.44 | -2.27 | 9.79  | 0        |          | 1 |
| 465   | 17200925 | ---                                                                                     |              | ---              | 0.44 | -2.28 | 3.45  | 1.14E-13 | 1        | 1 |
| 26692 | 17421462 | ---                                                                                     |              | ---              | 0.44 | -2.28 | 2.74  | 2.84E-14 | 1        | 1 |
| 407   | 17200805 | ---                                                                                     |              | ---              | 0.44 | -2.28 | 6.58  | 1.42E-14 | 1        | 1 |
| 12441 | 17283546 | ---                                                                                     |              | ---              | 0.44 | -2.28 | 1.50  | 0        |          | 1 |
| 15899 | 17314049 | ENSMUST00000082547 // Gm23737 // predicted gene, 23737 // --- // ---                    | Gm23737      | VSMUST0000008254 | 0.44 | -2.28 | 2.14  | 1.14E-13 | 1        | 1 |
| 29916 | 17455722 | ENSMUST00000165454 // Gm7963 // predicted gene 7963 // 5 E3 5 // 666169 /// ENSMUST0000 | Gm7963       | VSMUST0000016545 | 0.44 | -2.28 | 3.14  | 2.84E-14 | 1        | 1 |
| 1473  | 17202971 | ---                                                                                     |              | ---              | 0.44 | -2.28 | 2.32  | 0        |          | 1 |
| 12496 | 17283941 | ---                                                                                     |              | ---              | 0.44 | -2.28 | 1.60  | 0        |          | 1 |
| 14884 | 17303685 | XM_006519206 // Gm5458 // predicted gene 5458 // 14 A3 14 // 432825 /// ENSMUST00000163 | Gm5458       | XM_006519206     | 0.44 | -2.29 | 1.99  | 0        |          | 1 |
| 36051 | 17513399 | ---                                                                                     |              | ---              | 0.44 | -2.29 | 1.56  | 0        |          | 1 |
| 2797  | 17205665 | ---                                                                                     |              | ---              | 0.44 | -2.29 | 5.42  | 5.68E-14 | 1        | 1 |
| 3065  | 17206213 | ---                                                                                     |              | ---              | 0.44 | -2.29 | 1.84  | 0        |          | 1 |
| 18274 | 17337796 | BC010726 // Pla2g7 // phospholipase A2, group VII (platelet-activating factor acetylhyd | Pla2g7       | BC010726         | 0.44 | -2.29 | 6.01  | 5.68E-14 | 1        | 1 |
| 13857 | 17294738 | NM_001081249 // Vcan // versican // 13 C3 13 45.5 cM // 13003 /// NM_001134474 // Vcan  | Vcan         | NM_001081249     | 0.44 | -2.30 | 25.36 | 0        |          | 1 |
| 17530 | 17330769 | XM_006543335 // LOC102643284 // adenosylhomocysteinase-like // --- // 102643284 /// ENS | LOC102643284 | XM_006543335     | 0.44 | -2.30 | 1.10  | 5.68E-14 | 1        | 1 |
| 3675  | 17207471 | ---                                                                                     |              | ---              | 0.44 | -2.30 | 2.08  | 0        |          | 1 |
| 24155 | 17396162 | NM_009801 // Car2 // carbonic anhydrase 2 // 3 A1 3 3.23 cM // 12349 /// XM_006530050 / | Car2         | NM_009801        | 0.44 | -2.30 | 50.67 | 5.68E-14 | 1        | 1 |
| 4381  | 17208903 | ---                                                                                     |              | ---              | 0.43 | -2.30 | 1.37  | 0        |          | 1 |
| 2819  | 17205709 | ---                                                                                     |              | ---              | 0.43 | -2.30 | 3.60  | 0        |          | 1 |
| 1598  | 17203223 | ---                                                                                     |              | ---              | 0.43 | -2.30 | 6.16  | 2.84E-14 | 1        | 1 |
| 32453 | 17478956 | ENSMUST00000089593 // Gm7551 // predicted gene 7551 // --- // ---                       | Gm7551       | VSMUST0000008959 | 0.43 | -2.30 | 0.91  | 0        |          | 1 |
| 25768 | 17412229 | ENSMUST00000158184 // Gm24078 // predicted gene, 24078 // --- // ---                    | Gm24078      | VSMUST0000015818 | 0.43 | -2.30 | 2.23  | 2.84E-14 | 1        | 1 |
| 5028  | 17210213 | ---                                                                                     |              | ---              | 0.43 | -2.30 | 1.79  | 2.84E-14 | 1        | 1 |
| 1156  | 17202329 | ---                                                                                     |              | ---              | 0.43 | -2.31 | 4.34  | 5.68E-14 | 1        | 1 |
| 39695 | 17547226 | NM_207162 // Gm20738 // predicted gene, 20738 // Y C2 Y // 382133 /// ENSMUST0000017766 | Gm20738      | NM_207162        | 0.43 | -2.31 | 6.46  | 2.84E-14 | 1        | 1 |
| 39728 | 17547346 | NM_207162 // Gm20738 // predicted gene, 20738 // Y C2 Y // 382133 /// ENSMUST0000017766 | Gm20738      | NM_207162        | 0.43 | -2.31 | 6.46  | 2.84E-14 | 1        | 1 |
| 3742  | 17207605 | ---                                                                                     |              | ---              | 0.43 | -2.31 | 1.31  | 0        |          | 1 |
| 13190 | 17289160 | ENSMUST00000143025 // Gm15622 // predicted gene 15622 // --- // --- AK016283 // Gm1     | Gm15622      | VSMUST0000014302 | 0.43 | -2.31 | 0.84  | 2.84E-14 | 1        | 1 |
| 39744 | 17547389 | NM_207162 // Gm20738 // predicted gene, 20738 // Y C2 Y // 382133 /// ENSMUST0000017766 | Gm20738      | NM_207162        | 0.43 | -2.31 | 1.54  | 0        |          | 1 |
| 19949 | 17354430 | ENSMUST00000117021 // Gm23335 // predicted gene, 23335 // --- // ---                    | Gm23335      | VSMUST0000011702 | 0.43 | -2.31 | 2.19  | 0        |          | 1 |
| 12492 | 17283937 | ---                                                                                     |              | ---              | 0.43 | -2.31 | 2.74  | 0        |          | 1 |
| 4673  | 17209497 | ---                                                                                     |              | ---              | 0.43 | -2.32 | 2.96  | 0        |          | 1 |
| 5564  | 17213548 | NM_001077403 // Nrp2 // neuropilin 2 // 1 C2 1 // 18187 /// NM_001077404 // Nrp2 // neu | Nrp2         | NM_001077403     | 0.43 | -2.32 | 26.41 | 3.98E-13 | 1        | 1 |
| 3156  | 17206395 | ---                                                                                     |              | ---              | 0.43 | -2.32 | 3.05  | 2.84E-14 | 1        | 1 |
| 26000 | 17414507 | ENSMUST00000156693 // Gm13773 // predicted gene 13773 // --- // ---                     | Gm13773      | VSMUST0000015669 | 0.43 | -2.32 | 1.05  | 0        |          | 1 |
| 1882  | 17203807 | ---                                                                                     |              | ---              | 0.43 | -2.32 | 0.99  | 2.84E-14 | 1        | 1 |
| 39526 | 17546450 | NM_001025241 // Gm20747 // predicted gene, 20747 // Y A1 Y // 434960 /// ENSMUST0000018 | Gm20747      | NM_001025241     | 0.43 | -2.32 | 5.24  | 0        |          | 1 |
| 39703 | 17547261 | NM_001025241 // Gm20747 // predicted gene, 20747 // Y A1 Y // 434960 /// ENSMUST0000018 | Gm20747      | NM_001025241     | 0.43 | -2.32 | 5.24  | 0        |          | 1 |
| 39746 | 17547394 | NM_001025241 // Gm20747 // predicted gene, 20747 // Y A1 Y // 434960 /// ENSMUST0000018 | Gm20747      | NM_001025241     | 0.43 | -2.32 | 5.24  | 0        |          | 1 |
| 3938  | 17208003 | ---                                                                                     |              | ---              | 0.43 | -2.32 | 1.35  | 2.84E-14 | 1        | 1 |
| 691   | 17201381 | ---                                                                                     |              | ---              | 0.43 | -2.32 | 0.97  | 5.68E-14 | 1        | 1 |
| 2734  | 17205537 | ---                                                                                     |              | ---              | 0.43 | -2.32 | 4.04  | 0        |          | 1 |
| 3093  | 17206269 | ---                                                                                     |              | ---              | 0.43 | -2.32 | 1.29  | 1.14E-13 | 1        | 1 |
| 4372  | 17208881 | ---                                                                                     |              | ---              | 0.43 | -2.32 | 3.18  | 0        |          | 1 |
| 31324 | 17468143 | NM_008638 // Mthfd2 // methylenetetrahydrofolate dehydrogenase (NAD+ dependent), methen | Mthfd2       | NM_008638        | 0.43 | -2.32 | 3.08  | 0        |          | 1 |
| 3215  | 17206521 | ---                                                                                     |              | ---              | 0.43 | -2.33 | 1.25  | 7.11E-15 | 1        | 1 |
| 23241 | 17387700 | NM_146590 // Olfr1085 // olfactory receptor 1085 // 2 E1 2 // 258583 /// ENSMUST0000009 | Olfr1085     | NM_146590        | 0.43 | -2.33 | 1.15  | 0        |          | 1 |
| 1413  | 17202849 | ---                                                                                     |              | ---              | 0.43 | -2.33 | 2.89  | 0        |          | 1 |
| 39722 | 17547327 | XM_006542015 // LOC102635000 // uncharacterized LOC102635000 // --- // 102635000 /// XM | LOC102635000 | XM_006542015     | 0.43 | -2.33 | 1.77  | 0        |          | 1 |
| 14446 | 17300137 | ENSMUST00000103687 // Traj58 // T cell receptor alpha joining 58 // --- // ---          | Traj58       | VSMUST0000010368 | 0.43 | -2.33 | 12.14 | 0        |          | 1 |
| 33773 | 17491596 | NR_002895 // Snord116 // small nucleolar RNA, C/D box 116 // 7 C 7 29.0 cM // 64243 /// | Snord116     | NR_002895        | 0.43 | -2.33 | 4.49  | 0        |          | 1 |
| 33774 | 17491598 | NR_002895 // Snord116 // small nucleolar RNA, C/D box 116 // 7 C 7 29.0 cM // 64243 /// | Snord116     | NR_002895        | 0.43 | -2.33 | 4.49  | 0        |          | 1 |
| 33776 | 17491602 | NR_002895 // Snord116 // small nucleolar RNA, C/D box 116 // 7 C 7 29.0 cM // 64243 /// | Snord116     | NR_002895        | 0.43 | -2.33 | 4.49  | 0        |          | 1 |
| 33777 | 17491604 | NR_002895 // Snord116 // small nucleolar RNA, C/D box 116 // 7 C 7 29.0 cM // 64243 /// | Snord116     | NR_002895        | 0.43 | -2.33 | 4.49  | 0        |          | 1 |
| 33779 | 17491608 | NR_002895 // Snord116 // small nucleolar RNA, C/D box 116 // 7 C 7 29.0 cM // 64243 /// | Snord116     | NR_002895        | 0.43 | -2.33 | 4.49  | 0        |          | 1 |
| 33780 | 17491610 | NR_002895 // Snord116 // small nucleolar RNA, C/D box 116 // 7 C 7 29.0 cM // 64243 /// | Snord116     | NR_002895        | 0.43 | -2.33 | 4.49  | 0        |          | 1 |
| 33781 | 17491612 | NR_002895 // Snord116 // small nucleolar RNA, C/D box 116 // 7 C 7 29.0 cM // 64243 /// | Snord116     | NR_002895        | 0.43 | -2.33 | 4.49  | 0        |          | 1 |

|       |          |                                                                                           |               |                  |      |       |       |          |   |
|-------|----------|-------------------------------------------------------------------------------------------|---------------|------------------|------|-------|-------|----------|---|
| 33782 | 17491614 | NR_002895 // Snord116 // small nucleolar RNA, C/D box 116 // 7 C 7 29.0 cM // 64243 ///   | Snord116      | NR_002895        | 0.43 | -2.33 | 4.49  | 0        | 1 |
| 33783 | 17491616 | NR_002895 // Snord116 // small nucleolar RNA, C/D box 116 // 7 C 7 29.0 cM // 64243 ///   | Snord116      | NR_002895        | 0.43 | -2.33 | 4.49  | 0        | 1 |
| 33784 | 17491618 | NR_002895 // Snord116 // small nucleolar RNA, C/D box 116 // 7 C 7 29.0 cM // 64243 ///   | Snord116      | NR_002895        | 0.43 | -2.33 | 4.49  | 0        | 1 |
| 33785 | 17491620 | NR_002895 // Snord116 // small nucleolar RNA, C/D box 116 // 7 C 7 29.0 cM // 64243 ///   | Snord116      | NR_002895        | 0.43 | -2.33 | 4.49  | 0        | 1 |
| 33786 | 17491622 | NR_002895 // Snord116 // small nucleolar RNA, C/D box 116 // 7 C 7 29.0 cM // 64243 ///   | Snord116      | NR_002895        | 0.43 | -2.33 | 4.49  | 0        | 1 |
| 33787 | 17491624 | NR_002895 // Snord116 // small nucleolar RNA, C/D box 116 // 7 C 7 29.0 cM // 64243 ///   | Snord116      | NR_002895        | 0.43 | -2.33 | 4.49  | 0        | 1 |
| 33789 | 17491628 | NR_002895 // Snord116 // small nucleolar RNA, C/D box 116 // 7 C 7 29.0 cM // 64243 ///   | Snord116      | NR_002895        | 0.43 | -2.33 | 4.49  | 0        | 1 |
| 33790 | 17491630 | NR_002895 // Snord116 // small nucleolar RNA, C/D box 116 // 7 C 7 29.0 cM // 64243 ///   | Snord116      | NR_002895        | 0.43 | -2.33 | 4.49  | 0        | 1 |
| 10293 | 17261838 | ---                                                                                       | ---           | ---              | 0.43 | -2.33 | 1.12  | 4.26E-14 | 1 |
| 30830 | 17463971 | ENSMUST00000083948 // n-R5s168 // nuclear encoded rRNA 5S 168 // --- // ---               | n-R5s168      | VSMUST0000008394 | 0.43 | -2.34 | 2.92  | 0        | 1 |
| 2586  | 17205237 | ---                                                                                       | ---           | ---              | 0.43 | -2.34 | 1.20  | 5.68E-14 | 1 |
| 4638  | 17209427 | ---                                                                                       | ---           | ---              | 0.43 | -2.34 | 1.20  | 5.68E-14 | 1 |
| 5468  | 17212252 | NM_010553 // Il18rap // interleukin 18 receptor accessory protein // 1 B 1 // 16174 ///   | Il18rap       | NM_010553        | 0.43 | -2.34 | 5.80  | 0        | 1 |
| 22812 | 17382357 | ENSMUST00000083864 // Gm25518 // predicted gene, 25518 // --- // ---                      | Gm25518       | VSMUST0000008386 | 0.43 | -2.34 | 1.84  | 2.84E-14 | 1 |
| 3979  | 17208085 | ---                                                                                       | ---           | ---              | 0.43 | -2.34 | 3.09  | 5.68E-14 | 1 |
| 12595 | 17284474 | ---                                                                                       | ---           | ---              | 0.43 | -2.34 | 36.01 | 0        | 1 |
| 2010  | 17204071 | ---                                                                                       | ---           | ---              | 0.43 | -2.34 | 6.80  | 2.84E-14 | 1 |
| 38021 | 17533778 | ENSMUST00000082725 // Gm26131 // predicted gene, 26131 // --- // ---                      | Gm26131       | VSMUST0000008272 | 0.43 | -2.34 | 1.06  | 0        | 1 |
| 39753 | 17547413 | NM_001017394 // Gm20815 // predicted gene, 20815 // Y B Y // 100039753 /// NM_001025241   | Gm20815       | NM_001017394     | 0.43 | -2.34 | 3.55  | 0        | 1 |
| 32252 | 17476750 | ENSMUST00000157682 // Gm24505 // predicted gene, 24505 // --- // ---                      | Gm24505       | VSMUST0000015768 | 0.43 | -2.34 | 2.74  | 0        | 1 |
| 4952  | 17210059 | ---                                                                                       | ---           | ---              | 0.43 | -2.34 | 4.40  | 0        | 1 |
| 5078  | 17210319 | ---                                                                                       | ---           | ---              | 0.43 | -2.34 | 2.51  | 2.27E-13 | 1 |
| 12485 | 17283930 | NM_001164314 // Wars // tryptophanyl-tRNA synthetase // 12 12 F2 // 22375 /// NM_001164   | Wars          | NM_001164314     | 0.43 | -2.35 | 1.87  | 0        | 1 |
| 15464 | 17309302 | ENSMUST00000104531 // Gm25724 // predicted gene, 25724 // --- // ---                      | Gm25724       | VSMUST0000010453 | 0.43 | -2.35 | 1.98  | 0        | 1 |
| 25709 | 17411630 | ENSMUST00000127180 // Gm11795 // predicted gene 11795 // --- // ---                       | Gm11795       | VSMUST0000012718 | 0.43 | -2.35 | 1.06  | 0        | 1 |
| 33130 | 17486039 | NM_030739 // Vmn1r58 // vomeronasal 1 receptor 58 // 7 A 7 // 81014 /// ENSMUST0000010    | Vmn1r58       | NM_030739        | 0.43 | -2.35 | 1.08  | 0        | 1 |
| 254   | 17200499 | ---                                                                                       | ---           | ---              | 0.43 | -2.35 | 2.51  | 8.53E-14 | 1 |
| 14447 | 17300139 | ENSMUST00000103688 // Traj57 // T cell receptor alpha joining 57 // --- // ---            | Traj57        | VSMUST0000010368 | 0.43 | -2.35 | 11.61 | 0        | 1 |
| 12162 | 17280842 | NM_013562 // Ifrd1 // interferon-related developmental regulator 1 // 12 B 12 18.06 cM    | Ifrd1         | NM_013562        | 0.43 | -2.35 | 3.36  | 0        | 1 |
| 252   | 17200495 | ---                                                                                       | ---           | ---              | 0.43 | -2.35 | 1.23  | 1.14E-13 | 1 |
| 36141 | 17514352 | ENSMUST00000099051 // Gm10717 // predicted gene 10717 // --- // --- /// ENSMUST00000178   | Gm10717       | VSMUST0000009905 | 0.42 | -2.35 | 1.59  | 0        | 1 |
| 529   | 17201055 | ---                                                                                       | ---           | ---              | 0.42 | -2.35 | 1.94  | 0        | 1 |
| 2794  | 17205659 | ---                                                                                       | ---           | ---              | 0.42 | -2.36 | 8.03  | 5.68E-14 | 1 |
| 5247  | 17210661 | ---                                                                                       | ---           | ---              | 0.42 | -2.36 | 3.29  | 0        | 1 |
| 34408 | 17496857 | NM_009943 // Cox6a2 // cytochrome c oxidase subunit VIa polypeptide 2 // 7 F3 7 70.04 c   | Cox6a2        | NM_009943        | 0.42 | -2.36 | 2.89  | 5.68E-14 | 1 |
| 2016  | 17204083 | ---                                                                                       | ---           | ---              | 0.42 | -2.36 | 7.23  | 5.68E-14 | 1 |
| 20859 | 17363058 | NM_146681 // Olfr1424 // olfactory receptor 1424 // 19 C 19 // 258676 /// ENSMUST00000    | Olfr1424      | NM_146681        | 0.42 | -2.36 | 1.66  | 0        | 1 |
| 39587 | 17546668 | NM_207162 // Gm20738 // predicted gene, 20738 // Y C2 Y // 382133 /// ENSMUST0000017766   | Gm20738       | NM_207162        | 0.42 | -2.36 | 6.45  | 2.84E-14 | 1 |
| 2772  | 17205615 | ---                                                                                       | ---           | ---              | 0.42 | -2.36 | 5.33  | 0        | 1 |
| 1951  | 17203949 | ---                                                                                       | ---           | ---              | 0.42 | -2.37 | 7.42  | 2.84E-14 | 1 |
| 12084 | 17280179 | XR_381327 // 3110053B16Rik // RIKEN cDNA 3110053B16 gene // 12 A1.2 12 // 382686 /// EN   | 3110053B16Rik | XR_381327        | 0.42 | -2.37 | 2.13  | 2.84E-14 | 1 |
| 1354  | 17202729 | ---                                                                                       | ---           | ---              | 0.42 | -2.37 | 6.76  | 2.84E-14 | 1 |
| 7305  | 17232162 | NM_011704 // Vnn1 // vanin 1 // 10 10 A1-B2 // 22361 /// ENSMUST0000041416 // Vnn1 //     | Vnn1          | NM_011704        | 0.42 | -2.37 | 3.26  | 2.84E-14 | 1 |
| 1960  | 17203967 | ---                                                                                       | ---           | ---              | 0.42 | -2.37 | 8.03  | 8.53E-14 | 1 |
| 4207  | 17208551 | ---                                                                                       | ---           | ---              | 0.42 | -2.37 | 1.75  | 0        | 1 |
| 15321 | 17308132 | NM_026331 // Slc25a37 // solute carrier family 25, member 37 // 14 D2 14 // 67712 /// X   | Slc25a37      | NM_026331        | 0.42 | -2.37 | 1.94  | 0        | 1 |
| 22404 | 17378301 | ---                                                                                       | ---           | ---              | 0.42 | -2.37 | 4.69  | 5.68E-14 | 1 |
| 39535 | 17546469 | NM_001017393 // Gm21943 // predicted gene, 21943 // Y A1 Y // 434935 /// NM_001025241 /   | Gm21943       | NM_001017393     | 0.42 | -2.37 | 4.40  | 0        | 1 |
| 8529  | 17243629 | ---                                                                                       | ---           | ---              | 0.42 | -2.37 | 1.19  | 0        | 1 |
| 3561  | 17207225 | ---                                                                                       | ---           | ---              | 0.42 | -2.37 | 3.38  | 0        | 1 |
| 39545 | 17546502 | NM_001160135 // Gm20806 // predicted gene, 20806 // Y Y // 100039574 /// ENSMUST0000017   | Gm20806       | NM_001160135     | 0.42 | -2.38 | 4.01  | 2.84E-14 | 1 |
| 3848  | 17207819 | ---                                                                                       | ---           | ---              | 0.42 | -2.38 | 2.24  | 5.68E-14 | 1 |
| 37717 | 17530782 | NM_029103 // Manf // mesencephalic astrocyte-derived neurotrophic factor // 9 F1 9 57.9   | Manf          | NM_029103        | 0.42 | -2.38 | 1.72  | 5.68E-14 | 1 |
| 1802  | 17203647 | ---                                                                                       | ---           | ---              | 0.42 | -2.39 | 3.55  | 5.68E-14 | 1 |
| 33324 | 17487537 | ENSMUST00000174364 // Gm4201 // predicted gene 4201 // 7 A3 7 // 100043061 /// ENSMUST0   | Gm4201        | VSMUST0000017436 | 0.42 | -2.39 | 2.33  | 2.84E-14 | 1 |
| 33360 | 17487627 | ENSMUST00000174364 // Gm4201 // predicted gene 4201 // 7 A3 7 // 100043061 /// ENSMUST0   | Gm4201        | VSMUST0000017436 | 0.42 | -2.39 | 2.33  | 2.84E-14 | 1 |
| 39524 | 17546444 | NM_001103152 // Gm20831 // predicted gene, 20831 // Y Y // 100040223 /// NM_009220 // S   | Gm20831       | NM_001103152     | 0.42 | -2.39 | 1.53  | 0        | 1 |
| 33317 | 17487523 | NM_001166708 // Vmn1r119 // vomeronasal 1 receptor 119 // 7 A3 7 // 384696 /// ENSMUST0   | Vmn1r119      | NM_001166708     | 0.42 | -2.39 | 1.76  | 0        | 1 |
| 33353 | 17487613 | NM_001166708 // Vmn1r119 // vomeronasal 1 receptor 119 // 7 A3 7 // 384696 /// ENSMUST0   | Vmn1r119      | NM_001166708     | 0.42 | -2.39 | 1.76  | 0        | 1 |
| 4264  | 17208665 | ---                                                                                       | ---           | ---              | 0.42 | -2.39 | 3.53  | 1.71E-13 | 1 |
| 25562 | 17410067 | NM_031186 // Ndst3 // N-deacetylase/N-sulfotransferase (heparan glucosaminyl) 3 // 3 3    | Ndst3         | NM_031186        | 0.42 | -2.39 | 1.50  | 0        | 1 |
| 1724  | 17203483 | ---                                                                                       | ---           | ---              | 0.42 | -2.40 | 6.63  | 2.84E-14 | 1 |
| 1570  | 17203167 | ---                                                                                       | ---           | ---              | 0.42 | -2.40 | 1.46  | 1.14E-13 | 1 |
| 1499  | 17203023 | ---                                                                                       | ---           | ---              | 0.42 | -2.40 | 3.61  | 1.71E-13 | 1 |
| 7976  | 17238646 | NM_207620 // Olfr774 // olfactory receptor 774 // 10 D3 10 // 258232 /// ENSMUST0000009   | Olfr774       | NM_207620        | 0.42 | -2.40 | 1.26  | 1.42E-14 | 1 |
| 16886 | 17324546 | NM_198112 // Ostin // osteocrin // 16 B2 16 // 239790 /// XM_006522114 // Ostin // osteoc | Ostin         | NM_198112        | 0.42 | -2.41 | 1.75  | 0        | 1 |
| 19774 | 17352731 | NM_008720 // Npc1 // Niemann-Pick type C1 // 18 A1 18 6.15 cM // 18145 /// ENSMUST00000   | Npc1          | NM_008720        | 0.42 | -2.41 | 3.80  | 0        | 1 |
| 3418  | 17206939 | ---                                                                                       | ---           | ---              | 0.41 | -2.41 | 4.46  | 5.68E-14 | 1 |
| 33836 | 17491851 | ENSMUST00000175471 // Gm25249 // predicted gene, 25249 // --- // ---                      | Gm25249       | VSMUST0000017547 | 0.41 | -2.41 | 2.38  | 5.68E-14 | 1 |
| 41016 | 17550278 | ENSMUST00000175471 // Gm25249 // predicted gene, 25249 // --- // ---                      | Gm25249       | VSMUST0000017547 | 0.41 | -2.41 | 2.38  | 5.68E-14 | 1 |
| 30512 | 17460760 | NM_053225 // Vmn1r50 // vomeronasal 1 receptor 50 // 6 D1 6 // 113852 /// ENSMUST000000   | Vmn1r50       | NM_053225        | 0.41 | -2.41 | 1.01  | 4.26E-14 | 1 |
| 36158 | 17514515 | NM_010809 // Mmp3 // matrix metalloproteinase 3 // 9 A1 9 2.46 cM // 17392 /// ENSMUST00  | Mmp3          | NM_010809        | 0.41 | -2.41 | 4.91  | 2.84E-14 | 1 |
| 17653 | 17331720 | NM_011782 // Adams5 // a disintegrin-like and metalloproteinase (reprolysin type) with    | Adams5        | NM_011782        | 0.41 | -2.42 | 15.65 | 0        | 1 |
| 21159 | 17366213 | ---                                                                                       | ---           | ---              | 0.41 | -2.42 | 3.88  | 2.84E-14 | 1 |
| 39714 | 17547291 | NM_001017394 // Gm20815 // predicted gene, 20815 // Y B Y // 100039753 /// NM_001025241   | Gm20815       | NM_001017394     | 0.41 | -2.42 | 4.79  | 5.68E-14 | 1 |
| 16855 | 17324305 | NM_001190804 // Dnajb11 // Dnaj (Hsp40) homolog, subfamily B, member 11 // 16 B1 16 //    | Dnajb11       | NM_001190804     | 0.41 | -2.42 | 2.11  | 0        | 1 |
| 39537 | 17546476 | NR_038299 // Gm20871 // Sycp3 like Y-linked pseudogene // Y Y // 100041346 /// ENSMUST0   | Gm20871       | NR_038299        | 0.41 | -2.42 | 6.69  | 5.68E-14 | 1 |
| 21967 | 17373550 | NM_001025246 // Trp53i11 // transformation related protein 53 inducible protein 11 // 2   | Trp53i11      | NM_001025246     | 0.41 | -2.43 | 16.04 | 5.68E-14 | 1 |
| 6933  | 17228291 | ENSMUST00000082926 // n-R5s220 // nuclear encoded rRNA 5S 220 // --- // ---               | n-R5s220      | VSMUST0000008292 | 0.41 | -2.43 | 2.36  | 0        | 1 |
| 27972 | 17434875 | ---                                                                                       | ---           | ---              | 0.41 | -2.43 | 2.08  | 0        | 1 |
| 1530  | 17203087 | ---                                                                                       | ---           | ---              | 0.41 | -2.43 | 0.96  | 5.68E-14 | 1 |
| 3936  | 17207999 | ---                                                                                       | ---           | ---              | 0.41 | -2.43 | 3.96  | 1.42E-14 | 1 |
| 22288 | 17377144 | NM_053195 // Slc24a3 // solute carrier family 24 (sodium/potassium/calcium exchanger),    | Slc24a3       | NM_053195        | 0.41 | -2.43 | 10.34 | 5.68E-14 | 1 |
| 17109 | 17326638 | ENSMUST00000157767 // Gm26307 // predicted gene, 26307 // --- // ---                      | Gm26307       | VSMUST0000015776 | 0.41 | -2.43 | 1.19  | 0        | 1 |
| 4175  | 17208485 | ---                                                                                       | ---           | ---              | 0.41 | -2.43 | 1.99  | 2.84E-14 | 1 |
| 39660 | 17547076 | ---                                                                                       | ---           | ---              | 0.41 | -2.44 | 3.23  | 5.68E-14 | 1 |
| 37170 | 17525007 | NM_172920 // Dpy19l1 // dpy-19-like 1 (C. elegans) // 9 A4 9 // 244745 /// XM_006510296   | Dpy19l1       | NM_172920        | 0.41 | -2.44 | 2.15  | 0        | 1 |
| 41152 | 17550582 | ENSMUST00000082423 // mt-Tp // mitochondrially encoded tRNA proline // --- // ---         | mt-Tp         | VSMUST0000008242 | 0.41 | -2.44 | 3.11  | 1.14E-13 | 1 |
| 1467  | 17202959 | ---                                                                                       | ---           | ---              | 0.41 | -2.44 | 2.46  | 0        | 1 |
| 36755 | 17520156 | ENSMUST00000181449 // Gm26611 // predicted gene, 26611 // --- // ---                      | Gm26611       | VSMUST0000018144 | 0.41 | -2.45 | 2.33  | 0        | 1 |
| 3015  | 17206109 | ---                                                                                       | ---           | ---              | 0.41 | -2.45 | 1.57  | 0        | 1 |
| 17300 | 17328422 | ---                                                                                       | ---           | ---              | 0.41 | -2.45 | 1.22  | 7.11E-15 | 1 |
| 788   | 17201579 | ---                                                                                       | ---           | ---              | 0.41 | -2.45 | 2.96  | 0        | 1 |
| 2021  | 17204093 | ---                                                                                       | ---           | ---              | 0.41 | -2.45 | 5.20  | 5.68E-14 | 1 |
|       |          |                                                                                           |               |                  |      |       |       |          |   |

|       |          |                                                                                          |              |                  |      |       |       |          |   |
|-------|----------|------------------------------------------------------------------------------------------|--------------|------------------|------|-------|-------|----------|---|
| 21282 | 17366864 | ENSMUST00000116826 // Gm25316 // predicted gene, 25316 // --- // ---                     | Gm25316      | VSMUST000001168: | 0.41 | -2.45 | 3.18  | 0        | 1 |
| 36138 | 17514343 | ENSMUST00000075573 // Gm10717 // predicted gene 10717 // --- // ---                      | Gm10717      | VSMUST000000755: | 0.41 | -2.46 | 1.50  | 0        | 1 |
| 14784 | 17302724 | NM_008929 // Dnajc3 // Dnaj (Hsp40) homolog, subfamily C, member 3 // 14 E4 14 // 10003  | Dnajc3       | NM_008929        | 0.41 | -2.46 | 1.43  | 0        | 1 |
| 28174 | 17437490 | ENSMUST00000037618 // Rbpj // recombination signal binding protein for immunoglobulin k  | Rbpj         | VSMUST000000376: | 0.41 | -2.46 | 4.89  | 0        | 1 |
| 2458  | 17204975 | ---                                                                                      | ---          | ---              | 0.41 | -2.47 | 2.81  | 2.84E-14 | 1 |
| 39544 | 17546498 | NM_001025241 // Gm20747 // predicted gene, 20747 // Y A1 Y // 434960 /// NM_001160135 /  | Gm20747      | NM_001025241     | 0.40 | -2.47 | 4.08  | 0        | 1 |
| 23391 | 17388599 | NM_183106 // Ttc17 // tetratricopeptide repeat domain 17 // 2 E1 2 51.69 cM // 74569 //  | Ttc17        | NM_183106        | 0.40 | -2.47 | 1.63  | 0        | 1 |
| 1683  | 17203397 | ---                                                                                      | ---          | ---              | 0.40 | -2.47 | 4.47  | 5.68E-14 | 1 |
| 4812  | 17209777 | ---                                                                                      | ---          | ---              | 0.40 | -2.47 | 9.51  | 5.68E-14 | 1 |
| 1933  | 17203913 | ---                                                                                      | ---          | ---              | 0.40 | -2.47 | 8.40  | 2.84E-14 | 1 |
| 38461 | 17537513 | XM_006528646 // LOC102640642 // uncharacterized LOC102640642 // --- // 102640642 /// EN  | LOC102640642 | XM_006528646     | 0.40 | -2.48 | 7.77  | 2.84E-14 | 1 |
| 39864 | 17547674 | XM_006516435 // LOC102636530 // ubiquitin-like protein 5-like // --- // 102636530        | LOC102636530 | XM_006516435     | 0.40 | -2.48 | 1.20  | 0        | 1 |
| 38650 | 17538828 | ---                                                                                      | ---          | ---              | 0.40 | -2.48 | 1.38  | 0        | 1 |
| 169   | 17200325 | ---                                                                                      | ---          | ---              | 0.40 | -2.48 | 1.75  | 0        | 1 |
| 1485  | 17202995 | ---                                                                                      | ---          | ---              | 0.40 | -2.48 | 1.71  | 1.71E-13 | 1 |
| 5297  | 17210765 | ---                                                                                      | ---          | ---              | 0.40 | -2.48 | 4.90  | 8.53E-14 | 1 |
| 39760 | 17547436 | ---                                                                                      | ---          | ---              | 0.40 | -2.48 | 2.23  | 0        | 1 |
| 3896  | 17207915 | ---                                                                                      | ---          | ---              | 0.40 | -2.48 | 2.80  | 1.42E-14 | 1 |
| 914   | 17201835 | ---                                                                                      | ---          | ---              | 0.40 | -2.48 | 1.25  | 0        | 1 |
| 2833  | 17205737 | ---                                                                                      | ---          | ---              | 0.40 | -2.48 | 5.09  | 8.53E-14 | 1 |
| 5242  | 17210651 | ---                                                                                      | ---          | ---              | 0.40 | -2.48 | 2.65  | 1.14E-13 | 1 |
| 3247  | 17206587 | ---                                                                                      | ---          | ---              | 0.40 | -2.48 | 1.51  | 0        | 1 |
| 1641  | 17203311 | ---                                                                                      | ---          | ---              | 0.40 | -2.48 | 3.14  | 0        | 1 |
| 3077  | 17206237 | ---                                                                                      | ---          | ---              | 0.40 | -2.49 | 3.77  | 2.13E-14 | 1 |
| 1548  | 17203123 | ---                                                                                      | ---          | ---              | 0.40 | -2.49 | 1.16  | 0        | 1 |
| 5012  | 17210181 | ---                                                                                      | ---          | ---              | 0.40 | -2.49 | 1.86  | 1.14E-13 | 1 |
| 5192  | 17210549 | ---                                                                                      | ---          | ---              | 0.40 | -2.49 | 2.49  | 1.71E-13 | 1 |
| 27395 | 17428712 | ---                                                                                      | ---          | ---              | 0.40 | -2.49 | 1.90  | 1.42E-14 | 1 |
| 12488 | 17283933 | ---                                                                                      | ---          | ---              | 0.40 | -2.49 | 2.56  | 0        | 1 |
| 40624 | 17549296 | ---                                                                                      | ---          | ---              | 0.40 | -2.50 | 41.08 | 0        | 1 |
| 4813  | 17209779 | ---                                                                                      | ---          | ---              | 0.40 | -2.50 | 2.64  | 2.84E-14 | 1 |
| 22411 | 17378310 | ---                                                                                      | ---          | ---              | 0.40 | -2.50 | 1.19  | 5.68E-14 | 1 |
| 2795  | 17205661 | ---                                                                                      | ---          | ---              | 0.40 | -2.50 | 5.04  | 2.84E-14 | 1 |
| 3946  | 17208019 | ---                                                                                      | ---          | ---              | 0.40 | -2.51 | 1.43  | 0        | 1 |
| 15347 | 17308455 | ---                                                                                      | ---          | ---              | 0.40 | -2.51 | 1.34  | 0        | 1 |
| 2488  | 17205037 | ---                                                                                      | ---          | ---              | 0.40 | -2.51 | 3.76  | 0        | 1 |
| 4540  | 17209227 | ---                                                                                      | ---          | ---              | 0.40 | -2.51 | 3.76  | 0        | 1 |
| 36435 | 17516564 | NM_021395 // Hyou1 // hypoxia up-regulated 1 // 9 9 B // 12282 /// ENSMUST00000066601 /  | Hyou1        | NM_021395        | 0.40 | -2.51 | 2.54  | 0        | 1 |
| 29898 | 17455639 | XM_006536388 // LOC624931 // PRAME family member 12-like // 5 5 // 624931 /// XM_006536  | LOC624931    | XM_006536388     | 0.40 | -2.51 | 3.02  | 0        | 1 |
| 3262  | 17206617 | ---                                                                                      | ---          | ---              | 0.40 | -2.51 | 6.39  | 0        | 1 |
| 39713 | 17547288 | ENSMUST00000181549 // Gm20854 // predicted gene, 20854 // Y Y // 100040911 /// BC087891  | Gm20854      | VSMUST0000018154 | 0.40 | -2.51 | 6.64  | 0        | 1 |
| 39734 | 17547362 | ENSMUST00000181549 // Gm20854 // predicted gene, 20854 // Y Y // 100040911 /// BC087891  | Gm20854      | VSMUST0000018154 | 0.40 | -2.51 | 6.64  | 0        | 1 |
| 37903 | 17532653 | ENSMUST00000082423 // mt-Tp // mitochondrially encoded tRNA proline // --- // ---        | mt-Tp        | VSMUST000000824: | 0.40 | -2.51 | 3.87  | 5.68E-14 | 1 |
| 4198  | 17208531 | ---                                                                                      | ---          | ---              | 0.40 | -2.52 | 1.85  | 2.84E-14 | 1 |
| 13535 | 17291787 | NM_001033167 // Slc22a23 // solute carrier family 22, member 23 // 13 A3.3 13 // 73102   | Slc22a23     | NM_001033167     | 0.40 | -2.52 | 2.51  | 0        | 1 |
| 9842  | 17257066 | ---                                                                                      | ---          | ---              | 0.40 | -2.52 | 2.32  | 1.14E-13 | 1 |
| 38211 | 17535298 | NM_001164190 // Mtm1 // X-linked myotubular myopathy gene 1 // X A7.2 X 36.55 cM // 177  | Mtm1         | NM_001164190     | 0.40 | -2.52 | 1.71  | 1.71E-13 | 1 |
| 4036  | 17208201 | ---                                                                                      | ---          | ---              | 0.40 | -2.53 | 1.97  | 5.68E-14 | 1 |
| 39680 | 17547172 | ENSMUST00000178332 // Gm21882 // predicted gene, 21882 // --- // ---                     | Gm21882      | VSMUST000001783: | 0.40 | -2.53 | 3.03  | 0        | 1 |
| 12487 | 17283932 | ---                                                                                      | ---          | ---              | 0.40 | -2.53 | 2.78  | 0        | 1 |
| 13296 | 17290083 | NM_010330 // Emb // embigin // 13 D2.3 13 // 13723 /// ENSMUST0000022242 // Emb // emb   | Emb          | NM_010330        | 0.40 | -2.53 | 3.31  | 0        | 1 |
| 5148  | 17210459 | ---                                                                                      | ---          | ---              | 0.39 | -2.53 | 2.41  | 5.68E-14 | 1 |
| 19343 | 17348455 | ---                                                                                      | ---          | ---              | 0.39 | -2.53 | 1.08  | 0        | 1 |
| 14208 | 17298923 | ENSMUST00000104118 // Gm22469 // predicted gene, 22469 // --- // ---                     | Gm22469      | VSMUST000001041: | 0.39 | -2.54 | 2.30  | 2.84E-14 | 1 |
| 28405 | 17439622 | ENSMUST00000092990 // Agpat9 // 1-acylglycerol-3-phosphate O-acyltransferase 9 // 5 E4   | Agpat9       | VSMUST000000929: | 0.39 | -2.54 | 3.06  | 1.42E-13 | 1 |
| 25441 | 17408646 | ENSMUST00000122559 // Gm25325 // predicted gene, 25325 // --- // ---                     | Gm25325      | VSMUST000001225: | 0.39 | -2.54 | 1.50  | 0        | 1 |
| 33350 | 17487607 | NM_001166723 // Vmn1r94 // vomeronasal 1 receptor 94 // 7 A3 7 // 620537 /// NM_0011667  | Vmn1r94      | NM_001166723     | 0.39 | -2.54 | 2.48  | 2.84E-14 | 1 |
| 39529 | 17546457 | NM_001017393 // Gm21943 // predicted gene, 21943 // Y A1 Y // 434935 /// NM_001017394 /  | Gm21943      | NM_001017393     | 0.39 | -2.54 | 4.16  | 0        | 1 |
| 39531 | 17546461 | NM_207162 // Gm20738 // predicted gene, 20738 // Y C2 Y // 382133 /// ENSMUST0000017766  | Gm20738      | NM_207162        | 0.39 | -2.54 | 2.11  | 0        | 1 |
| 39532 | 17546463 | NM_207162 // Gm20738 // predicted gene, 20738 // Y C2 Y // 382133 /// ENSMUST0000017766  | Gm20738      | NM_207162        | 0.39 | -2.54 | 2.11  | 0        | 1 |
| 39533 | 17546465 | NM_207162 // Gm20738 // predicted gene, 20738 // Y C2 Y // 382133 /// ENSMUST0000017766  | Gm20738      | NM_207162        | 0.39 | -2.54 | 2.11  | 0        | 1 |
| 39754 | 17547415 | NM_001017393 // Gm21943 // predicted gene, 21943 // Y A1 Y // 434935 /// NM_001017394 /  | Gm21943      | NM_001017393     | 0.39 | -2.54 | 4.16  | 0        | 1 |
| 4863  | 17209879 | ---                                                                                      | ---          | ---              | 0.39 | -2.54 | 13.76 | 0        | 1 |
| 2850  | 17205775 | ---                                                                                      | ---          | ---              | 0.39 | -2.54 | 5.36  | 5.68E-14 | 1 |
| 21749 | 17371800 | NM_008397 // Itga6 // integrin alpha 6 // 2 C2-C3 2 42.79 cM // 16403 /// NM_001277970   | Itga6        | NM_008397        | 0.39 | -2.54 | 2.43  | 1.14E-13 | 1 |
| 39634 | 17546984 | NM_001017394 // Gm20815 // predicted gene, 20815 // Y B Y // 100039753 /// NM_001017393  | Gm20815      | NM_001017394     | 0.39 | -2.54 | 4.60  | 0        | 1 |
| 31989 | 17474728 | NM_001166844 // Vmn1r100 // vomeronasal 1 receptor 100 // 7 A3 7 // 100043536 /// NM_03  | Vmn1r100     | NM_001166844     | 0.39 | -2.55 | 2.60  | 2.84E-14 | 1 |
| 4843  | 17209839 | ---                                                                                      | ---          | ---              | 0.39 | -2.55 | 6.37  | 5.68E-14 | 1 |
| 15575 | 17310673 | NM_020332 // Ank // progressive ankylosis // 15 B1 15 10.23 cM // 11732 /// ENSMUST0000  | Ank          | NM_020332        | 0.39 | -2.55 | 2.91  | 0        | 1 |
| 1481  | 17202987 | ---                                                                                      | ---          | ---              | 0.39 | -2.55 | 2.17  | 1.42E-14 | 1 |
| 1157  | 17202331 | ---                                                                                      | ---          | ---              | 0.39 | -2.55 | 2.04  | 2.84E-14 | 1 |
| 36134 | 17514330 | ENSMUST00000143083 // Gm10721 // predicted gene 10721 // --- // --- /// ENSMUST00000178  | Gm10721      | VSMUST000001430: | 0.39 | -2.55 | 1.63  | 0        | 1 |
| 4677  | 17209505 | ---                                                                                      | ---          | ---              | 0.39 | -2.55 | 1.42  | 0        | 1 |
| 720   | 17201441 | ---                                                                                      | ---          | ---              | 0.39 | -2.55 | 1.14  | 2.84E-14 | 1 |
| 31992 | 17474736 | NM_001166750 // Vmn1r143 // vomeronasal 1 receptor 143 // 7 A3 7 // 667469 /// NM_00116  | Vmn1r143     | NM_001166750     | 0.39 | -2.55 | 2.50  | 0        | 1 |
| 32010 | 17474795 | NM_001166750 // Vmn1r143 // vomeronasal 1 receptor 143 // 7 A3 7 // 667469 /// NM_00116  | Vmn1r143     | NM_001166750     | 0.39 | -2.55 | 2.50  | 0        | 1 |
| 4700  | 17209551 | ---                                                                                      | ---          | ---              | 0.39 | -2.56 | 2.52  | 2.84E-14 | 1 |
| 2862  | 17205799 | ---                                                                                      | ---          | ---              | 0.39 | -2.56 | 1.37  | 2.84E-14 | 1 |
| 13750 | 17293706 | NM_009984 // Ctsl // cathepsin L // 13 B3 13 33.26 cM // 13039 /// XM_006517081 // Ctsl  | Ctsl         | NM_009984        | 0.39 | -2.56 | 22.26 | 5.68E-14 | 1 |
| 15501 | 17309664 | NR_033325 // Gm5089 // predicted gene 5089 // 14 E5 14 // 328479 /// ENSMUST00000081580  | Gm5089       | NR_033325        | 0.39 | -2.56 | 1.31  | 0        | 1 |
| 32000 | 17474759 | NM_001166744 // Vmn1r116 // vomeronasal 1 receptor 116 // 7 A3 7 // 667268 /// NM_00116  | Vmn1r116     | NM_001166744     | 0.39 | -2.56 | 2.54  | 0        | 1 |
| 32004 | 17474774 | NM_001166744 // Vmn1r116 // vomeronasal 1 receptor 116 // 7 A3 7 // 667268 /// NM_00116  | Vmn1r116     | NM_001166744     | 0.39 | -2.56 | 2.54  | 0        | 1 |
| 32015 | 17474807 | NM_001166744 // Vmn1r116 // vomeronasal 1 receptor 116 // 7 A3 7 // 667268 /// NM_00116  | Vmn1r116     | NM_001166744     | 0.39 | -2.56 | 2.54  | 0        | 1 |
| 1599  | 17203225 | ---                                                                                      | ---          | ---              | 0.39 | -2.56 | 1.77  | 0        | 1 |
| 16525 | 17320842 | ENSMUST00000158935 // Gm24668 // predicted gene, 24668 // --- // ---                     | Gm24668      | VSMUST000001589: | 0.39 | -2.57 | 1.65  | 1.07E-14 | 1 |
| 36978 | 17522812 | ENSMUST00000116759 // Mir467h // microRNA 467h // --- // ---                             | Mir467h      | VSMUST000001167: | 0.39 | -2.57 | 2.46  | 1.14E-13 | 1 |
| 1043  | 17202097 | ---                                                                                      | ---          | ---              | 0.39 | -2.57 | 2.77  | 0        | 1 |
| 12494 | 17283939 | ---                                                                                      | ---          | ---              | 0.39 | -2.57 | 2.17  | 0        | 1 |
| 4319  | 17208775 | ---                                                                                      | ---          | ---              | 0.39 | -2.57 | 4.08  | 5.68E-14 | 1 |
| 33123 | 17486008 | NM_009028 // Rasl2-9 // RAS-like, family 2, locus 9 // 7 A1 7 // 19428 /// ENSMUST000000 | Rasl2-9      | NM_009028        | 0.39 | -2.58 | 1.00  | 0        | 1 |
| 4444  | 17209035 | ---                                                                                      | ---          | ---              | 0.39 | -2.59 | 5.60  | 0        | 1 |
| 39635 | 17546989 | NM_001017393 // Gm21943 // predicted gene, 21943 // Y A1 Y // 434935 /// NM_001017394 /  | Gm21943      | NM_001017393     | 0.39 | -2.59 | 5.44  | 2.84E-14 | 1 |
| 3903  | 17207929 | ---                                                                                      | ---          | ---              | 0.39 | -2.59 | 5.31  | 0        | 1 |
| 39698 | 17547235 | NM_207162 // Gm20738 // predicted gene, 20738 // Y C2 Y // 382133 /// ENSMUST0000017766  | Gm20738      | NM_207162        | 0.39 | -2.59 | 1.96  | 0        | 1 |
| 39732 | 17547355 | NM_207162 // Gm20738 // predicted gene, 20738 // Y C2 Y // 382133 /// ENSMUST0000017766  | Gm20738      | NM_207162        | 0.39 | -2.59 | 1.96  | 0        | 1 |

|       |          |                                                                                          |              |                  |             |             |       |          |          |   |   |
|-------|----------|------------------------------------------------------------------------------------------|--------------|------------------|-------------|-------------|-------|----------|----------|---|---|
| 1941  | 17203929 | ---                                                                                      | ---          | ---              | ---         | <b>0.39</b> | -2.59 | 8.82     | 5.68E-14 | 1 |   |
| 2704  | 17205477 | ---                                                                                      | ---          | ---              | ---         | <b>0.39</b> | -2.59 | 7.88     | 1.14E-13 | 1 |   |
| 2522  | 17205105 | ---                                                                                      | ---          | ---              | ---         | <b>0.39</b> | -2.60 | 2.05     | 0        | 1 |   |
| 4574  | 17209295 | ---                                                                                      | ---          | ---              | ---         | <b>0.39</b> | -2.60 | 2.05     | 0        | 1 |   |
| 18613 | 17341303 | NM_177316 // Fpr-rs6 // formyl peptide receptor, related sequence 6 // 17 A3.2 17 // 32  | Fpr-rs6      | NM_177316        | <b>0.38</b> | -2.60       | 1.35  | 7.11E-15 | 1        | 1 |   |
| 17732 | 17332340 | ---                                                                                      | ---          | ---              | ---         | <b>0.38</b> | -2.60 | 2.49     | 0        | 1 |   |
| 3821  | 17207765 | ---                                                                                      | ---          | ---              | ---         | <b>0.38</b> | -2.60 | 2.66     | 0        | 1 |   |
| 17318 | 17328625 | NM_022324 // Sdf2l1 // stromal cell-derived factor 2-like 1 // 16 A3 16 // 64136 /// EN  | Sdf2l1       | NM_022324        | <b>0.38</b> | -2.61       | 3.53  | 0        | 1        | 1 |   |
| 898   | 17201803 | ---                                                                                      | ---          | ---              | ---         | <b>0.38</b> | -2.61 | 1.99     | 2.84E-14 | 1 |   |
| 984   | 17201979 | ---                                                                                      | ---          | ---              | ---         | <b>0.38</b> | -2.61 | 1.99     | 2.84E-14 | 1 |   |
| 1409  | 17202841 | ---                                                                                      | ---          | ---              | ---         | <b>0.38</b> | -2.61 | 3.64     | 5.68E-14 | 1 |   |
| 144   | 17200275 | ---                                                                                      | ---          | ---              | ---         | <b>0.38</b> | -2.61 | 1.95     | 0        | 1 |   |
| 39773 | 17547468 | ---                                                                                      | ---          | ---              | ---         | <b>0.38</b> | -2.62 | 1.88     | 0        | 1 |   |
| 39547 | 17546509 | NM_207162 // Gm20738 // predicted gene, 20738 // Y C2 Y // 382133 /// ENSMUST0000017766  | Gm20738      | NM_207162        | <b>0.38</b> | -2.62       | 5.73  | 2.84E-14 | 1        | 1 |   |
| 4482  | 17209111 | ---                                                                                      | ---          | ---              | ---         | <b>0.38</b> | -2.62 | 4.60     | 0        | 1 |   |
| 4804  | 17209761 | ---                                                                                      | ---          | ---              | ---         | <b>0.38</b> | -2.62 | 15.54    | 2.84E-14 | 1 |   |
| 21213 | 17366724 | NR_030469 // Mir669b // microRNA 669b // 2 2 // 735255 /// ENSMUST00000102172 // Mir669  | Mir669b      | NR_030469        | <b>0.38</b> | -2.62       | 1.21  | 0        | 1        | 1 |   |
| 701   | 17201403 | ---                                                                                      | ---          | ---              | ---         | <b>0.38</b> | -2.63 | 2.42     | 2.84E-14 | 1 |   |
| 12350 | 17282664 | NM_001271705 // Pgf // placental growth factor // 12 D 12 39.58 cM // 18654 /// NM_0088  | Pgf          | NM_001271705     | <b>0.38</b> | -2.63       | 9.47  | 0        | 1        | 1 |   |
| 15154 | 17306419 | ---                                                                                      | ---          | ---              | ---         | <b>0.38</b> | -2.63 | 3.56     | 8.53E-14 | 1 |   |
| 153   | 17200293 | ---                                                                                      | ---          | ---              | ---         | <b>0.38</b> | -2.63 | 5.45     | 5.68E-14 | 1 |   |
| 38446 | 17537409 | XM_006528435 // Astx // amplified spermatogenic transcripts X encoded // --- // 1001133  | Astx         | XM_006528435     | <b>0.38</b> | -2.63       | 6.78  | 2.84E-14 | 1        | 1 |   |
| 38452 | 17537450 | XM_006528435 // Astx // amplified spermatogenic transcripts X encoded // --- // 1001133  | Astx         | XM_006528435     | <b>0.38</b> | -2.63       | 6.78  | 2.84E-14 | 1        | 1 |   |
| 38457 | 17537488 | XM_006528435 // Astx // amplified spermatogenic transcripts X encoded // --- // 1001133  | Astx         | XM_006528435     | <b>0.38</b> | -2.63       | 6.78  | 2.84E-14 | 1        | 1 |   |
| 7805  | 17236900 | NM_013598 // Kitl // kit ligand // 10 D1 10 51.4 cM // 17311 /// ENSMUST00000020129 //   | Kitl         | NM_013598        | <b>0.38</b> | -2.63       | 30.84 | 5.68E-14 | 1        | 1 |   |
| 4174  | 17208483 | ---                                                                                      | ---          | ---              | ---         | <b>0.38</b> | -2.64 | 1.40     | 1.42E-14 | 1 |   |
| 32070 | 17475198 | ---                                                                                      | ---          | ---              | ---         | <b>0.38</b> | -2.64 | 1.92     | 2.84E-14 | 1 |   |
| 2632  | 17205329 | ---                                                                                      | ---          | ---              | ---         | <b>0.38</b> | -2.64 | 6.50     | 0        | 1 |   |
| 2232  | 17204519 | ---                                                                                      | ---          | ---              | ---         | <b>0.38</b> | -2.64 | 15.74    | 8.53E-14 | 1 |   |
| 11714 | 17277134 | NM_134188 // Acot2 // acyl-CoA thioesterase 2 // 12 12 D3 // 171210 /// ENSMUST000000021 | Acot2        | NM_134188        | <b>0.38</b> | -2.64       | 9.29  | 1.14E-13 | 1        | 1 |   |
| 39558 | 17546550 | NR_038299 // Gm20871 // Sycp3 like Y-linked pseudogene // Y Y // 100041346 /// ENSMUST0  | Gm20871      | NR_038299        | <b>0.38</b> | -2.65       | 6.34  | 5.68E-14 | 1        | 1 |   |
| 12562 | 17284379 | ENSMUST00000103444 // Ighv5-4 // immunoglobulin heavy variable 5-4 // --- // --- AK      | Ighv5-4      | VSMUST0000010344 | <b>0.38</b> | -2.65       | 99.28 | 2.27E-13 | 1        | 1 |   |
| 13083 | 17288225 | XR_382577 // Gm17353 // zinc finger protein 845-like // 13 13 34.5 cM // 100502941 ///   | Gm17353      | XR_382577        | <b>0.38</b> | -2.65       | 1.45  | 1.78E-14 | 1        | 1 |   |
| 24561 | 17400365 | NM_007802 // Ctsk // cathepsin K // 3 F2.1 3 40.74 cM // 13038 /// ENSMUST00000015664 /  | Ctsk         | NM_007802        | <b>0.38</b> | -2.65       | 48.62 | 3.41E-13 | 1        | 1 |   |
| 786   | 17201575 | ---                                                                                      | ---          | ---              | ---         | <b>0.38</b> | -2.65 | 2.73     | 2.84E-14 | 1 |   |
| 32008 | 17474789 | NM_001166738 // Vmn1r104 // vomeronasal 1 receptor 104 // 7 A3 7 // 667135 /// NM_00116  | Vmn1r104     | NM_001166738     | <b>0.38</b> | -2.65       | 2.45  | 2.84E-14 | 1        | 1 |   |
| 31990 | 17474730 | NM_001166738 // Vmn1r104 // vomeronasal 1 receptor 104 // 7 A3 7 // 667135 /// NM_00116  | Vmn1r104     | NM_001166738     | <b>0.38</b> | -2.66       | 2.44  | 2.84E-14 | 1        | 1 |   |
| 41142 | 17550562 | ENSMUST00000082403 // mt-Ts1 // mitochondrially encoded tRNA serine 1 // --- // ---      | mt-Ts1       | VSMUST0000008240 | <b>0.38</b> | -2.66       | 2.44  | 0        | 1        | 1 |   |
| 39541 | 17546488 | ENSMUST00000177552 // LOC101056195 // uncharacterized LOC101056195 // --- // 101056195   | LOC101056195 | VSMUST0000017755 | <b>0.38</b> | -2.66       | 3.54  | 0        | 1        | 1 |   |
| 2655  | 17205377 | ---                                                                                      | ---          | ---              | ---         | <b>0.38</b> | -2.66 | 2.58     | 0        | 1 |   |
| 39586 | 17546666 | ENSMUST00000179309 // Gm21732 // predicted gene, 21732 // --- // --- /// ENSMUST0000017  | Gm21732      | VSMUST0000017930 | <b>0.38</b> | -2.66       | 8.74  | 0        | 1        | 1 |   |
| 2726  | 17205521 | ---                                                                                      | ---          | ---              | ---         | <b>0.38</b> | -2.66 | 8.42     | 0        | 1 |   |
| 36133 | 17514328 | ---                                                                                      | ---          | ---              | ---         | <b>0.38</b> | -2.66 | 2.09     | 0        | 1 |   |
| 4062  | 17208255 | ---                                                                                      | ---          | ---              | ---         | <b>0.37</b> | -2.67 | 1.38     | 0        | 1 |   |
| 2627  | 17205319 | ---                                                                                      | ---          | ---              | ---         | <b>0.37</b> | -2.67 | 2.38     | 2.84E-14 | 1 |   |
| 363   | 17200717 | ---                                                                                      | ---          | ---              | ---         | <b>0.37</b> | -2.67 | 6.12     | 8.53E-14 | 1 |   |
| 31079 | 17466505 | ENSMUST00000182751 // Rbpsuh-rs3 // recombining binding protein suppressor of hairless   | Rbpsuh-rs3   | VSMUST0000018275 | <b>0.37</b> | -2.67       | 8.28  | 0        | 1        | 1 |   |
| 33358 | 17487623 | NM_001166712 // Vmn1r151 // vomeronasal 1 receptor 151 // 7 A3 7 // 435947 /// NM_00116  | Vmn1r151     | NM_001166712     | <b>0.37</b> | -2.68       | 2.60  | 0        | 1        | 1 |   |
| 73    | 17200131 | ---                                                                                      | ---          | ---              | ---         | <b>0.37</b> | -2.68 | 5.14     | 8.53E-14 | 1 |   |
| 29317 | 17449332 | ---                                                                                      | ---          | ---              | ---         | <b>0.37</b> | -2.68 | 1.94     | 1.42E-14 | 1 |   |
| 1488  | 17203001 | ---                                                                                      | ---          | ---              | ---         | <b>0.37</b> | -2.68 | 1.67     | 1.14E-13 | 1 |   |
| 35029 | 17502811 | ENSMUST00000182279 // Gm4891 // predicted gene 4891 // --- // ---                        | Gm4891       | VSMUST0000018227 | <b>0.37</b> | -2.68       | 2.18  | 3.55E-15 | 1        | 1 |   |
| 38448 | 17537423 | XM_006528435 // Astx // amplified spermatogenic transcripts X encoded // --- // 1001133  | Astx         | XM_006528435     | <b>0.37</b> | -2.68       | 6.97  | 2.84E-14 | 1        | 1 |   |
| 38450 | 17537437 | XM_006528435 // Astx // amplified spermatogenic transcripts X encoded // --- // 1001133  | Astx         | XM_006528435     | <b>0.37</b> | -2.68       | 6.97  | 2.84E-14 | 1        | 1 |   |
| 38456 | 17537483 | XM_006528435 // Astx // amplified spermatogenic transcripts X encoded // --- // 1001133  | Astx         | XM_006528435     | <b>0.37</b> | -2.68       | 6.97  | 2.84E-14 | 1        | 1 |   |
| 38459 | 17537502 | XM_006528435 // Astx // amplified spermatogenic transcripts X encoded // --- // 1001133  | Astx         | XM_006528435     | <b>0.37</b> | -2.68       | 6.97  | 2.84E-14 | 1        | 1 |   |
| 39699 | 17547238 | ---                                                                                      | ---          | ---              | ---         | <b>0.37</b> | -2.68 | 2.88     | 1.42E-14 | 1 |   |
| 12489 | 17283934 | ---                                                                                      | ---          | ---              | ---         | <b>0.37</b> | -2.68 | 1.82     | 5.68E-14 | 1 |   |
| 22133 | 17375327 | NM_001205369 // Casc4 // cancer susceptibility candidate 4 // 2 E5 2 // 319996 /// NM_0  | Casc4        | NM_001205369     | <b>0.37</b> | -2.69       | 13.96 | 0        | 1        | 1 |   |
| 1728  | 17203491 | ---                                                                                      | ---          | ---              | ---         | <b>0.37</b> | -2.69 | 3.36     | 0        | 1 |   |
| 4172  | 17208479 | ---                                                                                      | ---          | ---              | ---         | <b>0.37</b> | -2.69 | 2.78     | 0        | 1 |   |
| 12546 | 17284327 | ENSMUST00000103416 // Ighg2c // immunoglobulin heavy constant gamma 2C // --- // ---     | Ighg2c       | VSMUST0000010341 | <b>0.37</b> | -2.69       | 10.36 | 5.68E-14 | 1        | 1 |   |
| 1004  | 17202019 | ---                                                                                      | ---          | ---              | ---         | <b>0.37</b> | -2.69 | 2.27     | 0        | 1 |   |
| 32297 | 17477073 | NM_172900 // Siglecg // sialic acid binding Ig-like lectin G // 7 B4 7 // 243958 /// XM  | Siglecg      | NM_172900        | <b>0.37</b> | -2.70       | 10.52 | 0        | 1        | 1 |   |
| 20224 | 17357234 | ---                                                                                      | ---          | ---              | ---         | <b>0.37</b> | -2.70 | 1.36     | 2.84E-14 | 1 |   |
| 27173 | 17426563 | ENSMUST00000104124 // Gm24170 // predicted gene, 24170 // --- // ---                     | Gm24170      | VSMUST0000010412 | <b>0.37</b> | -2.70       | 1.31  | 0        | 1        | 1 |   |
| 2253  | 17204561 | ---                                                                                      | ---          | ---              | ---         | <b>0.37</b> | -2.70 | 3.09     | 0        | 1 |   |
| 3362  | 17206825 | ---                                                                                      | ---          | ---              | ---         | <b>0.37</b> | -2.70 | 2.90     | 2.84E-14 | 1 |   |
| 4753  | 17209657 | ---                                                                                      | ---          | ---              | ---         | <b>0.37</b> | -2.70 | 11.19    | 1.14E-13 | 1 |   |
| 8382  | 17241981 | NM_001277132 // Gm867 // predicted gene 867 // 10 C1 10 // 333670 /// NM_008606 // Mmp1  | Gm867        | NM_001277132     | <b>0.37</b> | -2.71       | 10.05 | 5.68E-14 | 1        | 1 |   |
| 2459  | 17204977 | ---                                                                                      | ---          | ---              | ---         | <b>0.37</b> | -2.71 | 5.01     | 5.68E-14 | 1 |   |
| 630   | 17201259 | ---                                                                                      | ---          | ---              | ---         | <b>0.37</b> | -2.71 | 2.66     | 1.71E-13 | 1 |   |
| 3902  | 17207927 | ---                                                                                      | ---          | ---              | ---         | <b>0.37</b> | -2.71 | 1.81     | 0        | 1 |   |
| 31239 | 17467471 | ENSMUST00000103363 // Igvk4-50 // immunoglobulin kappa variable 4-50 // --- // ---       | Igvk4-50     | VSMUST0000010336 | <b>0.37</b> | -2.72       | 97.66 | 5.68E-14 | 1        | 1 |   |
| 12495 | 17283940 | ---                                                                                      | ---          | ---              | ---         | <b>0.37</b> | -2.72 | 2.07     | 0        | 1 |   |
| 4978  | 17210111 | ---                                                                                      | ---          | ---              | ---         | <b>0.37</b> | -2.72 | 12.33    | 0        | 1 |   |
| 33739 | 17491493 | ENSMUST00000104168 // Gm26288 // predicted gene, 26288 // --- // ---                     | Gm26288      | VSMUST0000010416 | <b>0.37</b> | -2.72       | 2.68  | 0        | 1        | 1 |   |
| 2818  | 17205707 | ---                                                                                      | ---          | ---              | ---         | <b>0.37</b> | -2.73 | 1.94     | 5.68E-14 | 1 |   |
| 15573 | 17310661 | NM_177597 // March11 // membrane-associated ring finger (C3HC4) 11 // 15 B1 15 // 21114  | 11-Mar       | NM_177597        | <b>0.37</b> | -2.73       | 15.46 | 0        | 1        | 1 |   |
| 660   | 17201319 | ---                                                                                      | ---          | ---              | ---         | <b>0.37</b> | -2.73 | 1.87     | 0        | 1 |   |
| 1565  | 17203157 | ---                                                                                      | ---          | ---              | ---         | <b>0.37</b> | -2.73 | 2.40     | 0        | 1 |   |
| 33753 | 17491535 | ENSMUST00000180342 // Gm23862 // predicted gene, 23862 // --- // ---                     | Gm23862      | VSMUST0000018034 | <b>0.37</b> | -2.74       | 4.51  | 0        | 1        | 1 |   |
| 6905  | 17227828 | NM_008869 // Pla2g4a // phospholipase A2, group IVA (cytosolic, calcium-dependent) // 1  | Pla2g4a      | NM_008869        | <b>0.36</b> | -2.74       | 15.92 | 2.84E-13 | 1        | 1 |   |
| 3164  | 17206411 | ---                                                                                      | ---          | ---              | ---         | <b>0.36</b> | -2.76 | 5.97     | 0        | 1 |   |
| 38045 | 17533946 | NM_001168337 // Gm2825 // predicted gene 2825 // X A3.1 X // 100040533 /// ENSMUST00000  | Gm2825       | NM_001168337     | <b>0.36</b> | -2.77       | 1.48  | 0        | 1        | 1 |   |
| 25790 | 17412539 | NM_027491 // Rragd // Ras-related GTP binding D // 4 A5 4 14.57 cM // 52187 /// ENSMUST  | Rragd        | NM_027491        | <b>0.36</b> | -2.78       | 2.41  | 2.56E-13 | 1        | 1 |   |
| 39657 | 17547065 | ENSMUST00000177878 // Gm21788 // predicted gene, 21788 // --- // --- /// XR_406179 // S  | Gm21788      | VSMUST0000017787 | <b>0.36</b> | -2.78       | 5.17  | 0        | 1        | 1 |   |
| 5840  | 17216751 | ---                                                                                      | ---          | ---              | ---         | <b>0.36</b> | -2.78 | 3.94     | 8.53E-14 | 1 |   |
| 5903  | 17217440 | NM_028057 // Cyb5r1 // cytochrome b5 reductase 1 // 1 E4 1 // 72017 /// ENSMUST00000027  | Cyb5r1       | NM_028057        | <b>0.36</b> | -2.79       | 8.13  | 5.68E-14 | 1        | 1 |   |
| 1588  | 17203203 | ---                                                                                      | ---          | ---              | ---         | <b>0.36</b> | -2.80 | 2.19     | 0        | 1 |   |
| 35704 | 17509962 | ENSMUST00000158489 // Gm25906 // predicted gene, 25906 // --- // ---                     | Gm25906      | VSMUST0000015848 | <b>0.36</b> | -2.80       | 1.52  | 5.68E-14 | 1        | 1 |   |
| 3820  | 17207763 | ---                                                                                      | ---          | ---              | ---         | <b>0.36</b> | -2.80 | 1.32     | 0        | 1 |   |
| 7085  | 17230014 | ENSMUST00000090406 // BC094916 // cDNA sequence BC094916 // 1 H3 1 // 545384 /// ENSMUS  | BC094916     | VSMUST0000009040 | <b>0.36</b> | -2.81       | 29.33 | 0        | 1        | 1 |   |
| 9076  | 17249034 | ENSMUST00000175153 // Gm23813 // predicted gene, 23813 // --- // ---                     | Gm23813      | VSMUST0000017515 | <b>0.36</b> | -2.81       | 2.74  | 0        | 1        | 1 |   |
| 395   | 17200781 | ---                                                                                      | ---          | ---              | ---         | <b>0.36</b> | -2.81 | 10.41    | 5.68E-14 | 1 | 1 |

|       |          |                                                                                          |               |                  |       |       |          |          |   |
|-------|----------|------------------------------------------------------------------------------------------|---------------|------------------|-------|-------|----------|----------|---|
| 1721  | 17203477 | ---                                                                                      | ---           | 0.36             | -2.82 | 9.81  | 0        | 1        |   |
| 1451  | 17202927 | ---                                                                                      | ---           | 0.35             | -2.82 | 1.60  | 2.84E-14 | 1        |   |
| 37693 | 17530406 | NM_019807 // Acpp // acid phosphatase, prostate // 9 F1 9 // 56318 /// NM_207668 // Acp  | Acpp          | NM_019807        | 0.35  | -2.83 | 8.41     | 5.68E-14 | 1 |
| 34902 | 17501502 | ENSMUST00000157507 // Gm22586 // predicted gene, 22586 // --- // ---                     | Gm22586       | VSMUST0000015750 | 0.35  | -2.83 | 1.49     | 0        | 1 |
| 5181  | 17210527 | ---                                                                                      | ---           | 0.35             | -2.83 | 2.44  | 2.84E-14 | 1        |   |
| 1092  | 17202199 | ---                                                                                      | ---           | 0.35             | -2.84 | 2.82  | 2.84E-14 | 1        |   |
| 7088  | 17230034 | NM_001204910 // Al607873 // expressed sequence Al607873 // 1 H3 1 // 226691 /// ENSMUST  | Al607873      | NM_001204910     | 0.35  | -2.84 | 3.52     | 2.84E-14 | 1 |
| 36767 | 17520254 | NM_001003911 // Adamts7 // a disintegrin-like and metallopeptidase (reprolysins type) wi | Adamts7       | NM_001003911     | 0.35  | -2.84 | 2.39     | 0        | 1 |
| 15646 | 17311457 | ENSMUST00000104564 // Gm23530 // predicted gene, 23530 // --- // ---                     | Gm23530       | VSMUST0000010456 | 0.35  | -2.84 | 3.73     | 5.68E-14 | 1 |
| 1471  | 17202967 | ---                                                                                      | ---           | 0.35             | -2.84 | 1.92  | 5.68E-14 | 1        |   |
| 39758 | 17547428 | NM_001017393 // Gm21943 // predicted gene, 21943 // Y A1 Y // 434935 /// NM_001017394 /  | Gm21943       | NM_001017393     | 0.35  | -2.84 | 5.68     | 0        | 1 |
| 2274  | 17204603 | ---                                                                                      | ---           | 0.35             | -2.85 | 4.87  | 2.84E-14 | 1        |   |
| 255   | 17200501 | ---                                                                                      | ---           | 0.35             | -2.85 | 3.34  | 5.68E-14 | 1        |   |
| 39697 | 17547231 | NM_001017394 // Gm20815 // predicted gene, 20815 // Y B Y // 100039753 /// NM_001025241  | Gm20815       | NM_001017394     | 0.35  | -2.85 | 5.35     | 0        | 1 |
| 12591 | 17284463 | ENSMUST00000103461 // Igh-VS107 // immunoglobulin heavy chain (S107 family) // 12 F1 12  | Igh-VS107     | VSMUST0000010346 | 0.35  | -2.86 | 103.44   | 5.68E-14 | 1 |
| 2631  | 17205327 | ---                                                                                      | ---           | 0.35             | -2.86 | 5.68  | 2.84E-14 | 1        |   |
| 39517 | 17546423 | NM_001103152 // Gm20831 // predicted gene, 20831 // Y Y // 100040223 /// NM_009220 // S  | Gm20831       | NM_001103152     | 0.35  | -2.88 | 2.65     | 0        | 1 |
| 4419  | 17208985 | ---                                                                                      | ---           | 0.35             | -2.88 | 10.88 | 2.84E-14 | 1        |   |
| 2754  | 17205577 | ---                                                                                      | ---           | 0.35             | -2.88 | 4.56  | 2.84E-14 | 1        |   |
| 35671 | 17509687 | ENSMUST00000175101 // Gm24333 // predicted gene, 24333 // --- // ---                     | Gm24333       | VSMUST0000017510 | 0.35  | -2.88 | 2.16     | 0        | 1 |
| 35764 | 17510585 | ---                                                                                      | ---           | 0.35             | -2.88 | 3.25  | 0        | 1        |   |
| 24141 | 17396047 | ENSMUST00000180874 // C030034L19Rik // RIKEN cDNA C030034L19 gene // --- // --- /// AKO  | C030034L19Rik | VSMUST0000018087 | 0.35  | -2.88 | 5.41     | 5.68E-14 | 1 |
| 13356 | 17290695 | ---                                                                                      | ---           | 0.35             | -2.88 | 2.64  | 1.71E-13 | 1        |   |
| 12579 | 17284432 | ENSMUST00000103463 // Ighv14-1 // immunoglobulin heavy variable 14-1 // --- // --- ///   | Ighv14-1      | VSMUST0000010346 | 0.35  | -2.88 | 68.01    | 5.68E-14 | 1 |
| 25    | 17200035 | ---                                                                                      | ---           | 0.35             | -2.89 | 2.11  | 0        | 1        |   |
| 649   | 17201297 | ---                                                                                      | ---           | 0.35             | -2.89 | 1.44  | 1.42E-14 | 1        |   |
| 10455 | 17263154 | NM_001011861 // Olfr331 // olfactory receptor 331 // 11 B1.3 11 // 100502887 /// ENSMUS  | Olfr331       | NM_001011861     | 0.35  | -2.89 | 2.95     | 2.84E-14 | 1 |
| 31874 | 17473726 | NM_134206 // Vmn1r74 // vomeronasal 1 receptor 74 // 7 A1 7 // 171240 /// ENSMUST000000  | Vmn1r74       | NM_134206        | 0.35  | -2.90 | 1.31     | 0        | 1 |
| 32069 | 17475197 | ---                                                                                      | ---           | 0.35             | -2.90 | 5.29  | 2.13E-14 | 1        |   |
| 526   | 17201049 | ---                                                                                      | ---           | 0.34             | -2.90 | 3.91  | 2.84E-14 | 1        |   |
| 1601  | 17203231 | ---                                                                                      | ---           | 0.34             | -2.90 | 1.76  | 0        | 1        |   |
| 537   | 17201071 | ---                                                                                      | ---           | 0.34             | -2.90 | 3.00  | 0        | 1        |   |
| 29316 | 17449330 | ENSMUST00000102029 // Gm24121 // predicted gene, 24121 // --- // --- /// ENSMUST0000017  | Gm24121       | VSMUST0000010202 | 0.34  | -2.90 | 2.09     | 0        | 1 |
| 12277 | 17281922 | ---                                                                                      | ---           | 0.34             | -2.91 | 4.35  | 1.14E-13 | 1        |   |
| 5214  | 17210593 | ---                                                                                      | ---           | 0.34             | -2.91 | 5.61  | 5.68E-14 | 1        |   |
| 7907  | 17237833 | ENSMUST00000175420 // Gm22183 // predicted gene, 22183 // --- // ---                     | Gm22183       | VSMUST0000017542 | 0.34  | -2.91 | 1.56     | 5.68E-14 | 1 |
| 39701 | 17547251 | NM_207162 // Gm20738 // predicted gene, 20738 // Y C2 Y // 382133 /// ENSMUST0000017766  | Gm20738       | NM_207162        | 0.34  | -2.91 | 6.29     | 1.42E-14 | 1 |
| 20974 | 17364111 | NM_009890 // Ch25h // cholesterol 25-hydroxylase // 19 C1 19 // 12642 /// ENSMUST000000  | Ch25h         | NM_009890        | 0.34  | -2.92 | 38.40    | 2.27E-13 | 1 |
| 5226  | 17210617 | ---                                                                                      | ---           | 0.34             | -2.92 | 4.65  | 2.84E-14 | 1        |   |
| 13237 | 17289547 | NM_007960 // Etv1 // ets variant 1 // 12 A3-B1 12 17.99 cM // 14009 /// XM_006514965 //  | Etv1          | NM_007960        | 0.34  | -2.93 | 14.62    | 5.68E-14 | 1 |
| 2018  | 17204087 | ---                                                                                      | ---           | 0.34             | -2.93 | 7.59  | 8.53E-14 | 1        |   |
| 1357  | 17202735 | ---                                                                                      | ---           | 0.34             | -2.93 | 4.29  | 2.84E-14 | 1        |   |
| 4960  | 17210075 | ---                                                                                      | ---           | 0.34             | -2.94 | 11.30 | 0        | 1        |   |
| 16641 | 17322163 | NM_013566 // Itgb7 // integrin beta 7 // 15 F3 15 57.39 cM // 16421 /// ENSMUST00000001  | Itgb7         | NM_013566        | 0.34  | -2.94 | 23.17    | 0        | 1 |
| 2007  | 17204065 | ---                                                                                      | ---           | 0.34             | -2.95 | 9.29  | 0        | 1        |   |
| 3834  | 17207791 | ---                                                                                      | ---           | 0.34             | -2.95 | 2.48  | 1.14E-13 | 1        |   |
| 3374  | 17206849 | ---                                                                                      | ---           | 0.34             | -2.95 | 4.16  | 5.68E-14 | 1        |   |
| 33321 | 17487531 | NM_001166837 // Vmn1r114 // vomeronasal 1 receptor 114 // 7 A3 7 // 100042996 /// NM_00  | Vmn1r114      | NM_001166837     | 0.34  | -2.96 | 2.65     | 0        | 1 |
| 33357 | 17487621 | NM_001166837 // Vmn1r114 // vomeronasal 1 receptor 114 // 7 A3 7 // 100042996 /// NM_00  | Vmn1r114      | NM_001166837     | 0.34  | -2.96 | 2.65     | 0        | 1 |
| 28879 | 17445440 | NM_027399 // Steap1 // six transmembrane epithelial antigen of the prostate 1 // 5 A1 5  | Steap1        | NM_027399        | 0.34  | -2.96 | 16.42    | 0        | 1 |
| 36132 | 17514326 | ENSMUST00000151376 // Gm10722 // predicted gene 10722 // --- // ---                      | Gm10722       | VSMUST0000015137 | 0.34  | -2.96 | 3.31     | 5.68E-14 | 1 |
| 2188  | 17204427 | ---                                                                                      | ---           | 0.34             | -2.97 | 11.25 | 0        | 1        |   |
| 4758  | 17209667 | ---                                                                                      | ---           | 0.34             | -2.97 | 11.91 | 5.68E-14 | 1        |   |
| 6324  | 17221250 | ---                                                                                      | ---           | 0.34             | -2.97 | 2.49  | 0        | 1        |   |
| 2093  | 17204237 | ---                                                                                      | ---           | 0.34             | -2.98 | 13.47 | 0        | 1        |   |
| 1284  | 17202585 | ---                                                                                      | ---           | 0.34             | -2.98 | 6.55  | 0        | 1        |   |
| 27978 | 17434973 | NM_013657 // Sema3c // sema domain, immunoglobulin domain (Ig), short basic domain, sec  | Sema3c        | NM_013657        | 0.34  | -2.98 | 38.28    | 1.71E-13 | 1 |
| 1918  | 17203881 | ---                                                                                      | ---           | 0.34             | -2.98 | 9.98  | 1.14E-13 | 1        |   |
| 39518 | 17546425 | ENSMUST00000179900 // Srsy // serine-rich, secreted, Y-linked // Y A1 Y // 385550 /// E  | Srsy          | VSMUST0000017990 | 0.34  | -2.98 | 5.81     | 0        | 1 |
| 31993 | 17474738 | NM_001122682 // Vmn1r132 // vomeronasal 1 receptor 132 // 7 A3 7 // 100043604 /// NM_00  | Vmn1r132      | NM_001122682     | 0.33  | -2.99 | 2.79     | 0        | 1 |
| 21972 | 17373594 | ENSMUST00000104819 // Gm23487 // predicted gene, 23487 // --- // ---                     | Gm23487       | VSMUST0000010481 | 0.33  | -2.99 | 1.47     | 5.68E-14 | 1 |
| 13350 | 17290666 | NM_011118 // Prl2c3 // prolactin family 2, subfamily c, member 3 // 13 A1 13 // 18812 /  | Prl2c3        | NM_011118        | 0.33  | -2.99 | 4.83     | 2.84E-14 | 1 |
| 1996  | 17204043 | ---                                                                                      | ---           | 0.33             | -3.01 | 7.37  | 2.84E-14 | 1        |   |
| 22290 | 17377168 | ENSMUST00000158086 // Gm22731 // predicted gene, 22731 // --- // ---                     | Gm22731       | VSMUST0000015808 | 0.33  | -3.01 | 3.59     | 0        | 1 |
| 39764 | 17547445 | NM_001017393 // Gm21943 // predicted gene, 21943 // Y A1 Y // 434935 /// NM_001017394 /  | Gm21943       | NM_001017393     | 0.33  | -3.01 | 5.31     | 0        | 1 |
| 1415  | 17202853 | ---                                                                                      | ---           | 0.33             | -3.02 | 9.15  | 2.84E-14 | 1        |   |
| 28899 | 17445627 | ENSMUST00000158619 // Gm24054 // predicted gene, 24054 // --- // ---                     | Gm24054       | VSMUST0000015861 | 0.33  | -3.03 | 3.25     | 5.68E-14 | 1 |
| 39702 | 17547256 | NM_001017393 // Gm21943 // predicted gene, 21943 // Y A1 Y // 434935 /// NM_001017394 /  | Gm21943       | NM_001017393     | 0.33  | -3.03 | 6.14     | 1.42E-14 | 1 |
| 25039 | 17405082 | NM_011990 // Slc7a11 // solute carrier family 7 (cationic amino acid transporter, y+ sy  | Slc7a11       | NM_011990        | 0.33  | -3.03 | 4.49     | 2.84E-14 | 1 |
| 33525 | 17489399 | ENSMUST00000161684 // Fxyd5 // FXYD domain-containing ion transport regulator 5 // 7 B1  | Fxyd5         | VSMUST0000016168 | 0.33  | -3.05 | 3.98     | 0        | 1 |
| 3775  | 17207673 | ---                                                                                      | ---           | 0.33             | -3.06 | 3.07  | 5.68E-14 | 1        |   |
| 4356  | 17208849 | ---                                                                                      | ---           | 0.33             | -3.07 | 2.77  | 5.68E-14 | 1        |   |
| 2561  | 17205187 | ---                                                                                      | ---           | 0.33             | -3.07 | 3.12  | 0        | 1        |   |
| 4613  | 17209377 | ---                                                                                      | ---           | 0.33             | -3.07 | 3.12  | 0        | 1        |   |
| 36136 | 17514337 | ENSMUST00000099047 // Gm10719 // predicted gene 10719 // --- // ---                      | Gm10719       | VSMUST0000009904 | 0.32  | -3.08 | 4.34     | 0        | 1 |
| 39729 | 17547349 | XM_006541892 // LOC102631913 // Y-linked testis-specific protein 1-like // --- // 10263  | LOC102631913  | XM_006541892     | 0.32  | -3.08 | 6.74     | 0        | 1 |
| 41147 | 17550572 | ENSMUST00000082416 // mt-Ts2 // mitochondrially encoded tRNA serine 2 // --- // ---      | mt-Ts2        | VSMUST0000008241 | 0.32  | -3.08 | 2.38     | 0        | 1 |
| 5169  | 17210501 | ---                                                                                      | ---           | 0.32             | -3.08 | 3.76  | 0        | 1        |   |
| 3544  | 17207191 | ---                                                                                      | ---           | 0.32             | -3.08 | 4.98  | 0        | 1        |   |
| 22939 | 17383892 | NM_008491 // Lcn2 // lipocalin 2 // 2 A3 2 22.09 cM // 16819 /// ENSMUST00000050785 //   | Lcn2          | NM_008491        | 0.32  | -3.08 | 9.23     | 0        | 1 |
| 39742 | 17547385 | NM_001017393 // Gm21943 // predicted gene, 21943 // Y A1 Y // 434935 /// NM_001025241 /  | Gm21943       | NM_001017393     | 0.32  | -3.09 | 5.13     | 0        | 1 |
| 1592  | 17203211 | ---                                                                                      | ---           | 0.32             | -3.11 | 2.52  | 0        | 1        |   |
| 2853  | 17205781 | ---                                                                                      | ---           | 0.32             | -3.11 | 4.27  | 1.42E-14 | 1        |   |
| 1064  | 17202141 | ---                                                                                      | ---           | 0.32             | -3.11 | 1.84  | 0        | 1        |   |
| 3945  | 17208017 | ---                                                                                      | ---           | 0.32             | -3.13 | 2.58  | 0        | 1        |   |
| 1464  | 17202953 | ---                                                                                      | ---           | 0.32             | -3.13 | 2.13  | 2.84E-14 | 1        |   |
| 8766  | 17246386 | XM_887185 // Olfr764 // olfactory receptor 764 // 10 D3 10 // 622733                     | Olfr764       | XM_887185        | 0.32  | -3.14 | 2.92     | 0        | 1 |
| 6323  | 17221249 | ---                                                                                      | ---           | 0.32             | -3.14 | 9.23  | 0        | 1        |   |
| 18108 | 17336414 | ENSMUST00000041982 // H2-DMb2 // histocompatibility 2, class II, locus Mb2 // 17 B1 17   | H2-DMb2       | VSMUST0000004198 | 0.32  | -3.14 | 46.81    | 0        | 1 |
| 1594  | 17203215 | ---                                                                                      | ---           | 0.32             | -3.17 | 2.16  | 1.42E-13 | 1        |   |
| 1850  | 17203743 | ---                                                                                      | ---           | 0.31             | -3.18 | 2.45  | 0        | 1        |   |
| 37059 | 17523680 | NR_039546 // Mir101c // microRNA 101c // 9 9 1.84 cM // 100628572                        | Mir101c       | NR_039546        | 0.31  | -3.18 | 7.67     | 0        | 1 |
| 2212  | 17204479 | ---                                                                                      | ---           | 0.31             | -3.18 | 10.59 | 0        | 1        |   |
| 1990  | 17204031 | ---                                                                                      | ---           | 0.31             | -3.18 | 11.24 | 8.53E-14 | 1        |   |
| 4129  | 17208393 | ---                                                                                      | ---           | 0.31             | -3.19 | 2.96  | 0        | 1        |   |

|       |          |                                                                                         |              |                  |      |       |       |          |   |
|-------|----------|-----------------------------------------------------------------------------------------|--------------|------------------|------|-------|-------|----------|---|
| 39730 | 17547351 | NM_001017393 // Gm21943 // predicted gene, 21943 // Y A1 Y // 434935 /// NM_001025241 / | Gm21943      | NM_001017393     | 0.31 | -3.19 | 5.23  | 5.68E-14 | 1 |
| 39739 | 17547378 | NM_001017393 // Gm21943 // predicted gene, 21943 // Y A1 Y // 434935 /// NM_001025241 / | Gm21943      | NM_001017393     | 0.31 | -3.19 | 5.23  | 5.68E-14 | 1 |
| 3276  | 17206647 | ---                                                                                     | ---          | ---              | 0.31 | -3.19 | 3.40  | 2.84E-14 | 1 |
| 5246  | 17210659 | ---                                                                                     | ---          | ---              | 0.31 | -3.19 | 6.54  | 5.68E-14 | 1 |
| 20888 | 17363160 | ENSMUST00000104103 // Gm24124 // predicted gene, 24124 // --- // ---                    | Gm24124      | VSMUST0000010410 | 0.31 | -3.20 | 2.28  | 0        | 1 |
| 33343 | 17487586 | NM_001166726 // Vmn1r127 // vomeronasal 1 receptor 127 // 7 A3 7 // 621561 /// NM_00116 | Vmn1r127     | NM_001166726     | 0.31 | -3.20 | 4.02  | 0        | 1 |
| 33367 | 17487647 | NM_001166726 // Vmn1r127 // vomeronasal 1 receptor 127 // 7 A3 7 // 621561 /// NM_00116 | Vmn1r127     | NM_001166726     | 0.31 | -3.20 | 4.02  | 0        | 1 |
| 2191  | 17204433 | ---                                                                                     | ---          | ---              | 0.31 | -3.21 | 14.95 | 0        | 1 |
| 39530 | 17546459 | XM_006541892 // LOC102631913 // Y-linked testis-specific protein 1-like // --- // 10263 | LOC102631913 | XM_006541892     | 0.31 | -3.21 | 5.54  | 0        | 1 |
| 20337 | 17357910 | NM_001011840 // Olfr1463 // olfactory receptor 1463 // 19 A 19 // 258120 /// ENSMUST000 | Olfr1463     | NM_001011840     | 0.31 | -3.22 | 2.47  | 5.68E-14 | 1 |
| 4037  | 17208203 | ---                                                                                     | ---          | ---              | 0.31 | -3.23 | 4.42  | 1.42E-14 | 1 |
| 39743 | 17547387 | XM_006541892 // LOC102631913 // Y-linked testis-specific protein 1-like // --- // 10263 | LOC102631913 | XM_006541892     | 0.31 | -3.24 | 5.15  | 0        | 1 |
| 1007  | 17202025 | ---                                                                                     | ---          | ---              | 0.31 | -3.24 | 1.82  | 2.84E-14 | 1 |
| 3960  | 17208047 | ---                                                                                     | ---          | ---              | 0.31 | -3.25 | 2.56  | 5.68E-14 | 1 |
| 39642 | 17547012 | NM_001103152 // Gm20831 // predicted gene, 20831 // Y Y // 100040223 /// NM_009220 // S | Gm20831      | NM_001103152     | 0.31 | -3.26 | 2.96  | 0        | 1 |
| 7657  | 17235358 | ENSMUST00000158603 // Gm25044 // predicted gene, 25044 // --- // ---                    | Gm25044      | VSMUST0000015860 | 0.31 | -3.27 | 2.31  | 0        | 1 |
| 31194 | 17467316 | NM_007836 // Gadd45a // growth arrest and DNA-damage-inducible 45 alpha // 6 C1 6 // 13 | Gadd45a      | NM_007836        | 0.31 | -3.27 | 6.46  | 0        | 1 |
| 3965  | 17208057 | ---                                                                                     | ---          | ---              | 0.31 | -3.27 | 2.39  | 2.84E-14 | 1 |
| 39747 | 17547396 | XM_006541892 // LOC102631913 // Y-linked testis-specific protein 1-like // --- // 10263 | LOC102631913 | XM_006541892     | 0.30 | -3.29 | 6.10  | 0        | 1 |
| 3134  | 17206351 | ---                                                                                     | ---          | ---              | 0.30 | -3.30 | 2.82  | 2.84E-14 | 1 |
| 3097  | 17206277 | ---                                                                                     | ---          | ---              | 0.30 | -3.31 | 8.01  | 5.68E-14 | 1 |
| 9828  | 17257052 | ---                                                                                     | ---          | ---              | 0.30 | -3.35 | 3.46  | 4.26E-14 | 1 |
| 12168 | 17280893 | NM_013760 // Dnajb9 // Dnaj (Hsp40) homolog, subfamily B, member 9 // 12 B1 12 // 27362 | Dnajb9       | NM_013760        | 0.30 | -3.35 | 2.89  | 0        | 1 |
| 39534 | 17546467 | NM_001017393 // Gm21943 // predicted gene, 21943 // Y A1 Y // 434935 /// NM_001025241 / | Gm21943      | NM_001017393     | 0.30 | -3.36 | 6.64  | 0        | 1 |
| 3599  | 17207315 | ---                                                                                     | ---          | ---              | 0.30 | -3.36 | 3.04  | 5.68E-14 | 1 |
| 22045 | 17374198 | NM_146884 // Olfr1299 // olfactory receptor 1299 // 2 E5 2 // 258886                    | Olfr1299     | NM_146884        | 0.30 | -3.36 | 2.04  | 2.84E-14 | 1 |
| 1484  | 17202993 | ---                                                                                     | ---          | ---              | 0.30 | -3.37 | 1.92  | 2.84E-14 | 1 |
| 3482  | 17207067 | ---                                                                                     | ---          | ---              | 0.30 | -3.37 | 3.79  | 2.84E-14 | 1 |
| 33339 | 17487572 | NM_001166725 // Vmn1r129 // vomeronasal 1 receptor 129 // 7 A3 7 // 621510 /// ENSMUSTO | Vmn1r129     | NM_001166725     | 0.30 | -3.38 | 7.91  | 9.95E-14 | 1 |
| 2857  | 17205789 | ---                                                                                     | ---          | ---              | 0.30 | -3.38 | 3.79  | 0        | 1 |
| 32001 | 17474761 | NM_001122682 // Vmn1r132 // vomeronasal 1 receptor 132 // 7 A3 7 // 100043604 /// NM_03 | Vmn1r132     | NM_001122682     | 0.29 | -3.39 | 2.50  | 0        | 1 |
| 4233  | 17208603 | ---                                                                                     | ---          | ---              | 0.29 | -3.39 | 7.73  | 0        | 1 |
| 39648 | 17547026 | ENSMUST00000179900 // Srsy // serine-rich, secreted, Y-linked // Y A1 Y // 385550 /// E | Srsy         | VSMUST0000017990 | 0.29 | -3.41 | 5.31  | 0        | 1 |
| 17388 | 17329361 | NM_001102409 // Kng2 // kininogen 2 // 16 B1 16 // 385643 /// NM_001102410 // Kng2 // k | Kng2         | NM_001102409     | 0.29 | -3.41 | 4.09  | 0        | 1 |
| 4785  | 17209723 | ---                                                                                     | ---          | ---              | 0.29 | -3.42 | 7.52  | 2.84E-14 | 1 |
| 1551  | 17203129 | ---                                                                                     | ---          | ---              | 0.29 | -3.43 | 1.85  | 1.42E-13 | 1 |
| 8689  | 17245422 | NM_010441 // Hmga2 // high mobility group AT-hook 2 // 10 D2 10 67.94 cM // 15364 /// E | Hmga2        | NM_010441        | 0.29 | -3.44 | 10.45 | 0        | 1 |
| 39771 | 17547464 | NM_207162 // Gm20738 // predicted gene, 20738 // Y C2 Y // 382133 /// ENSMUST0000009684 | Gm20738      | NM_207162        | 0.29 | -3.45 | 6.64  | 5.68E-14 | 1 |
| 629   | 17201257 | ---                                                                                     | ---          | ---              | 0.29 | -3.45 | 3.08  | 0        | 1 |
| 30663 | 17462566 | NM_008646 // Mug2 // murinoglobulin 2 // 6 F1 6 // 17837 /// ENSMUST00000081777 // Mug2 | Mug2         | NM_008646        | 0.29 | -3.47 | 1.89  | 0        | 1 |
| 39759 | 17547434 | XM_006541892 // LOC102631913 // Y-linked testis-specific protein 1-like // --- // 10263 | LOC102631913 | XM_006541892     | 0.29 | -3.48 | 6.05  | 0        | 1 |
| 376   | 17200743 | ---                                                                                     | ---          | ---              | 0.29 | -3.48 | 6.17  | 5.68E-14 | 1 |
| 2442  | 17204943 | ---                                                                                     | ---          | ---              | 0.29 | -3.48 | 2.88  | 5.68E-14 | 1 |
| 10822 | 17267430 | NM_025638 // Gdpd1 // glycerophosphodiester phosphodiesterase domain containing 1 // 11 | Gdpd1        | NM_025638        | 0.29 | -3.48 | 9.30  | 0        | 1 |
| 37891 | 17532629 | ENSMUST00000082416 // mt-Ts2 // mitochondrially encoded tRNA serine 2 // --- // --- //  | mt-Ts2       | VSMUST000000824: | 0.29 | -3.50 | 2.64  | 0        | 1 |
| 32071 | 17475200 | ---                                                                                     | ---          | ---              | 0.29 | -3.50 | 2.04  | 1.14E-13 | 1 |
| 39567 | 17546586 | ENSMUST00000179309 // Gm21732 // predicted gene, 21732 // --- // --- // ENSMUST0000017  | Gm21732      | VSMUST0000017930 | 0.28 | -3.51 | 12.47 | 2.84E-14 | 1 |
| 4161  | 17208457 | ---                                                                                     | ---          | ---              | 0.28 | -3.52 | 2.46  | 1.14E-13 | 1 |
| 32778 | 17481776 | NM_001276301 // Ampd3 // adenosine monophosphate deaminase 3 // 7 E2-E3 7 57.85 cM // 1 | Ampd3        | NM_001276301     | 0.28 | -3.52 | 3.39  | 1.71E-13 | 1 |
| 3381  | 17206863 | ---                                                                                     | ---          | ---              | 0.28 | -3.52 | 3.49  | 2.84E-14 | 1 |
| 39675 | 17547156 | ENSMUST00000179309 // Gm21732 // predicted gene, 21732 // --- // --- // ENSMUST0000017  | Gm21732      | VSMUST0000017930 | 0.28 | -3.53 | 10.56 | 2.84E-14 | 1 |
| 449   | 17200893 | ---                                                                                     | ---          | ---              | 0.28 | -3.54 | 5.42  | 8.53E-14 | 1 |
| 4014  | 17208155 | ---                                                                                     | ---          | ---              | 0.28 | -3.54 | 3.38  | 0        | 1 |
| 28250 | 17438318 | ---                                                                                     | ---          | ---              | 0.28 | -3.55 | 4.40  | 1.14E-13 | 1 |
| 637   | 17201273 | ---                                                                                     | ---          | ---              | 0.28 | -3.56 | 3.42  | 0        | 1 |
| 1834  | 17203711 | ---                                                                                     | ---          | ---              | 0.28 | -3.58 | 10.49 | 0        | 1 |
| 2287  | 17204629 | ---                                                                                     | ---          | ---              | 0.28 | -3.59 | 4.09  | 0        | 1 |
| 4965  | 17210085 | ---                                                                                     | ---          | ---              | 0.28 | -3.60 | 11.30 | 8.53E-14 | 1 |
| 39647 | 17547022 | ENSMUST00000179900 // Srsy // serine-rich, secreted, Y-linked // Y A1 Y // 385550 /// E | Srsy         | VSMUST0000017990 | 0.28 | -3.62 | 5.94  | 0        | 1 |
| 39649 | 17547030 | ENSMUST00000179900 // Srsy // serine-rich, secreted, Y-linked // Y A1 Y // 385550 /// E | Srsy         | VSMUST0000017990 | 0.28 | -3.62 | 5.94  | 0        | 1 |
| 39681 | 17547174 | ENSMUST00000179900 // Srsy // serine-rich, secreted, Y-linked // Y A1 Y // 385550 /// E | Srsy         | VSMUST0000017990 | 0.28 | -3.62 | 5.94  | 2.84E-14 | 1 |
| 4513  | 17209173 | ---                                                                                     | ---          | ---              | 0.28 | -3.62 | 2.22  | 1.71E-13 | 1 |
| 39731 | 17547353 | XM_006541892 // LOC102631913 // Y-linked testis-specific protein 1-like // --- // 10263 | LOC102631913 | XM_006541892     | 0.27 | -3.65 | 6.08  | 0        | 1 |
| 39741 | 17547383 | XM_006541892 // LOC102631913 // Y-linked testis-specific protein 1-like // --- // 10263 | LOC102631913 | XM_006541892     | 0.27 | -3.65 | 6.08  | 0        | 1 |
| 39737 | 17547371 | XM_006541892 // LOC102631913 // Y-linked testis-specific protein 1-like // --- // 10263 | LOC102631913 | XM_006541892     | 0.27 | -3.65 | 6.61  | 0        | 1 |
| 10997 | 17269158 | NM_027800 // Krtap2-4 // keratin associated protein 2-4 // 11 D 11 // 71453 /// ENSMUST | Krtap2-4     | NM_027800        | 0.27 | -3.67 | 2.61  | 0        | 1 |
| 39706 | 17547269 | XM_006541892 // LOC102631913 // Y-linked testis-specific protein 1-like // --- // 10263 | LOC102631913 | XM_006541892     | 0.27 | -3.69 | 6.46  | 0        | 1 |
| 37234 | 17525680 | ---                                                                                     | ---          | ---              | 0.27 | -3.69 | 3.14  | 0        | 1 |
| 41149 | 17550576 | ENSMUST00000082417 // mt-TI2 // mitochondrially encoded tRNA leucine 2 // --- // ---    | mt-TI2       | VSMUST000000824: | 0.27 | -3.71 | 3.04  | 0        | 1 |
| 3741  | 17207603 | ---                                                                                     | ---          | ---              | 0.27 | -3.72 | 4.88  | 5.68E-14 | 1 |
| 128   | 17200243 | ---                                                                                     | ---          | ---              | 0.27 | -3.72 | 2.68  | 2.84E-14 | 1 |
| 1191  | 17202399 | ---                                                                                     | ---          | ---              | 0.27 | -3.72 | 3.12  | 5.68E-14 | 1 |
| 13709 | 17293348 | NM_001145801 // Ctla2b // cytotoxic T lymphocyte-associated protein 2 beta // 13 13 //  | Ctla2b       | NM_001145801     | 0.27 | -3.72 | 12.55 | 2.84E-14 | 1 |
| 337   | 17200665 | ---                                                                                     | ---          | ---              | 0.27 | -3.74 | 7.26  | 8.53E-14 | 1 |
| 2228  | 17204511 | ---                                                                                     | ---          | ---              | 0.27 | -3.75 | 17.54 | 2.84E-14 | 1 |
| 5325  | 17210823 | ---                                                                                     | ---          | ---              | 0.26 | -3.80 | 6.25  | 1.42E-14 | 1 |
| 39581 | 17546647 | ENSMUST00000179309 // Gm21732 // predicted gene, 21732 // --- // --- // ENSMUST0000017  | Gm21732      | VSMUST0000017930 | 0.26 | -3.81 | 12.00 | 5.68E-14 | 1 |
| 2854  | 17205783 | ---                                                                                     | ---          | ---              | 0.26 | -3.82 | 4.38  | 5.68E-14 | 1 |
| 13351 | 17290674 | NM_031191 // Prl2c2 // prolactin family 2, subfamily c, member 2 // 13 A1 13 5.18 cM // | Prl2c2       | NM_031191        | 0.26 | -3.85 | 9.06  | 2.84E-14 | 1 |
| 29694 | 17453133 | ---                                                                                     | ---          | ---              | 0.26 | -3.85 | 2.59  | 1.42E-13 | 1 |
| 3949  | 17208025 | ---                                                                                     | ---          | ---              | 0.26 | -3.86 | 2.92  | 0        | 1 |
| 1085  | 17202185 | ---                                                                                     | ---          | ---              | 0.26 | -3.86 | 2.42  | 1.07E-14 | 1 |
| 3498  | 17207099 | ---                                                                                     | ---          | ---              | 0.26 | -3.87 | 3.31  | 0        | 1 |
| 1957  | 17203961 | ---                                                                                     | ---          | ---              | 0.26 | -3.91 | 11.12 | 0        | 1 |
| 3491  | 17207085 | ---                                                                                     | ---          | ---              | 0.25 | -3.93 | 3.61  | 1.42E-14 | 1 |
| 560   | 17201117 | ---                                                                                     | ---          | ---              | 0.25 | -3.94 | 4.64  | 5.68E-14 | 1 |
| 37894 | 17532635 | ENSMUST00000082422 // mt-Tt // mitochondrially encoded tRNA threonine // --- // ---     | mt-Tt        | VSMUST000000824: | 0.25 | -3.94 | 2.88  | 0        | 1 |
| 1631  | 17203291 | ---                                                                                     | ---          | ---              | 0.25 | -3.95 | 3.10  | 1.42E-14 | 1 |
| 11100 | 17270083 | ---                                                                                     | ---          | ---              | 0.25 | -3.98 | 3.49  | 5.68E-14 | 1 |
| 2990  | 17206057 | ---                                                                                     | ---          | ---              | 0.25 | -3.98 | 3.30  | 0        | 1 |
| 2877  | 17205829 | ---                                                                                     | ---          | ---              | 0.25 | -3.99 | 2.47  | 1.71E-13 | 1 |
| 28419 | 17439805 | NM_016779 // Dmp1 // dentin matrix protein 1 // 5 E5 5 50.61 cM // 13406 /// XM_0065347 | Dmp1         | NM_016779        | 0.25 | -3.99 | 8.17  | 0        | 1 |
| 4288  | 17208713 | ---                                                                                     | ---          | ---              | 0.25 | -4.00 | 6.23  | 2.84E-14 | 1 |
| 5272  | 17210715 | ---                                                                                     | ---          | ---              | 0.25 | -4.00 | 2.27  | 0        | 1 |
| 1971  | 17203991 | ---                                                                                     | ---          | ---              | 0.25 | -4.02 | 5.71  | 2.84E-14 | 1 |



|       |          |                                                                                         |              |                  |      |        |       |          |   |
|-------|----------|-----------------------------------------------------------------------------------------|--------------|------------------|------|--------|-------|----------|---|
| 38880 | 17540902 | ENSMUST00000179466 // Gm2964 // predicted gene 2964 // X A3.1 X // 100040781            | Gm2964       | VSMUST0000017946 | 0.25 | -4.02  | 3.24  | 0        | 1 |
| 13213 | 17289380 | ENSMUST00000104762 // Gm22007 // predicted gene, 22007 // --- // ---                    | Gm22007      | VSMUST0000010476 | 0.25 | -4.05  | 5.22  | 8.53E-14 | 1 |
| 1993  | 17204037 | ---                                                                                     | ---          | ---              | 0.25 | -4.06  | 11.57 | 1.14E-13 | 1 |
| 5332  | 17210837 | ---                                                                                     | ---          | ---              | 0.25 | -4.06  | 3.69  | 5.68E-14 | 1 |
| 39588 | 17546671 | XM_006541892 // LOC102631913 // Y-linked testis-specific protein 1-like // --- // 10263 | LOC102631913 | XM_006541892     | 0.25 | -4.07  | 7.17  | 0        | 1 |
| 13756 | 17293793 | ---                                                                                     | ---          | ---              | 0.25 | -4.07  | 2.35  | 2.84E-14 | 1 |
| 5091  | 17210345 | ---                                                                                     | ---          | ---              | 0.24 | -4.09  | 8.30  | 2.84E-14 | 1 |
| 5190  | 17210545 | ---                                                                                     | ---          | ---              | 0.24 | -4.10  | 2.66  | 1.99E-13 | 1 |
| 41151 | 17550580 | ENSMUST00000082422 // mt-Tt // mitochondrially encoded tRNA threonine // --- // ---     | mt-Tt        | VSMUST0000008242 | 0.24 | -4.12  | 3.02  | 1.71E-13 | 1 |
| 409   | 17200809 | ---                                                                                     | ---          | ---              | 0.24 | -4.13  | 6.17  | 0        | 1 |
| 38592 | 17538754 | ---                                                                                     | ---          | ---              | 0.24 | -4.15  | 7.30  | 0        | 1 |
| 1501  | 17203027 | ---                                                                                     | ---          | ---              | 0.24 | -4.19  | 3.45  | 1.14E-13 | 1 |
| 1388  | 17202797 | ---                                                                                     | ---          | ---              | 0.24 | -4.21  | 5.26  | 0        | 1 |
| 1496  | 17203017 | ---                                                                                     | ---          | ---              | 0.24 | -4.24  | 3.64  | 0        | 1 |
| 33788 | 17491626 | ENSMUST00000101891 // Gm22173 // predicted gene, 22173 // --- // ---                    | Gm22173      | VSMUST0000010189 | 0.24 | -4.24  | 5.61  | 7.11E-15 | 1 |
| 4506  | 17209159 | ---                                                                                     | ---          | ---              | 0.23 | -4.26  | 3.26  | 1.71E-13 | 1 |
| 18577 | 17341037 | ENSMUST00000101829 // Gm26375 // predicted gene, 26375 // --- // ---                    | Gm26375      | VSMUST0000010182 | 0.23 | -4.28  | 4.40  | 7.11E-15 | 1 |
| 10061 | 17259507 | NM_001025427 // Hmga1 // high mobility group AT-hook 1 // 17 A3.3 17 14.5 cM // 15361 / | Hmga1        | NM_001025427     | 0.23 | -4.29  | 3.94  | 0        | 1 |
| 22743 | 17381519 | ENSMUST00000083890 // Gm26315 // predicted gene, 26315 // --- // ---                    | Gm26315      | VSMUST0000008389 | 0.23 | -4.31  | 3.81  | 3.55E-14 | 1 |
| 2080  | 17204211 | ---                                                                                     | ---          | ---              | 0.23 | -4.34  | 9.64  | 0        | 1 |
| 23627 | 17391437 | ---                                                                                     | ---          | ---              | 0.23 | -4.34  | 8.26  | 1.71E-13 | 1 |
| 14494 | 17300233 | ENSMUST00000103733 // Traj7 // T cell receptor alpha joining 7 // --- // ---            | Traj7        | VSMUST0000010373 | 0.23 | -4.38  | 52.38 | 0        | 1 |
| 4851  | 17209855 | ---                                                                                     | ---          | ---              | 0.22 | -4.54  | 6.09  | 5.68E-14 | 1 |
| 2712  | 17205493 | ---                                                                                     | ---          | ---              | 0.22 | -4.56  | 4.01  | 0        | 1 |
| 7378  | 17232910 | NR_039554 // Mir3473b // microRNA 3473b // 10 10 22.64 cM // 100628609 /// ENSMUST00000 | Mir3473b     | NR_039554        | 0.22 | -4.59  | 4.12  | 0        | 1 |
| 2113  | 17204277 | ---                                                                                     | ---          | ---              | 0.22 | -4.60  | 20.88 | 5.68E-14 | 1 |
| 458   | 17200911 | ---                                                                                     | ---          | ---              | 0.22 | -4.60  | 5.82  | 2.84E-14 | 1 |
| 2403  | 17204865 | ---                                                                                     | ---          | ---              | 0.22 | -4.62  | 3.48  | 0        | 1 |
| 2230  | 17204515 | ---                                                                                     | ---          | ---              | 0.21 | -4.67  | 7.29  | 1.42E-14 | 1 |
| 4402  | 17208949 | ---                                                                                     | ---          | ---              | 0.21 | -4.68  | 11.16 | 1.14E-13 | 1 |
| 1768  | 17203573 | ---                                                                                     | ---          | ---              | 0.21 | -4.72  | 5.30  | 0        | 1 |
| 1876  | 17203795 | ---                                                                                     | ---          | ---              | 0.21 | -4.79  | 9.40  | 2.84E-14 | 1 |
| 492   | 17200979 | ---                                                                                     | ---          | ---              | 0.21 | -4.84  | 4.45  | 0        | 1 |
| 1219  | 17202455 | ---                                                                                     | ---          | ---              | 0.20 | -4.94  | 4.68  | 2.13E-14 | 1 |
| 20722 | 17361546 | NM_028623 // Cst6 // cystatin E/M // 19 A 19 4.3 cM // 73720 /// ENSMUST00000025764 //  | Cst6         | NM_028623        | 0.20 | -4.99  | 7.40  | 2.84E-14 | 1 |
| 1040  | 17202091 | ---                                                                                     | ---          | ---              | 0.20 | -5.02  | 6.34  | 2.84E-14 | 1 |
| 29233 | 17448772 | ---                                                                                     | ---          | ---              | 0.20 | -5.12  | 7.96  | 0        | 1 |
| 2565  | 17205195 | ---                                                                                     | ---          | ---              | 0.19 | -5.18  | 8.72  | 0        | 1 |
| 4617  | 17209385 | ---                                                                                     | ---          | ---              | 0.19 | -5.18  | 8.72  | 0        | 1 |
| 397   | 17200785 | ---                                                                                     | ---          | ---              | 0.19 | -5.35  | 6.40  | 5.68E-14 | 1 |
| 5284  | 17210739 | ---                                                                                     | ---          | ---              | 0.18 | -5.48  | 10.15 | 4.26E-14 | 1 |
| 2269  | 17204593 | ---                                                                                     | ---          | ---              | 0.18 | -5.62  | 5.59  | 5.68E-14 | 1 |
| 162   | 17200311 | ---                                                                                     | ---          | ---              | 0.18 | -5.70  | 10.49 | 1.42E-14 | 1 |
| 2732  | 17205533 | ---                                                                                     | ---          | ---              | 0.17 | -5.80  | 9.11  | 1.42E-14 | 1 |
| 31904 | 17473957 | ENSMUST00000101946 // Gm24701 // predicted gene, 24701 // --- // ---                    | Gm24701      | VSMUST0000010194 | 0.17 | -5.85  | 7.39  | 0        | 1 |
| 3445  | 17206993 | ---                                                                                     | ---          | ---              | 0.16 | -6.27  | 5.18  | 1.42E-14 | 1 |
| 22414 | 17378313 | ---                                                                                     | ---          | ---              | 0.16 | -6.38  | 6.10  | 0        | 1 |
| 2716  | 17205501 | ---                                                                                     | ---          | ---              | 0.15 | -6.56  | 9.34  | 1.14E-13 | 1 |
| 8999  | 17248424 | ENSMUST00000082643 // Gm25799 // predicted gene, 25799 // --- // ---                    | Gm25799      | VSMUST0000008264 | 0.15 | -6.65  | 5.15  | 0        | 1 |
| 1487  | 17202999 | ---                                                                                     | ---          | ---              | 0.15 | -6.65  | 6.20  | 5.68E-14 | 1 |
| 3252  | 17206597 | ---                                                                                     | ---          | ---              | 0.15 | -6.69  | 4.63  | 0        | 1 |
| 1892  | 17203829 | ---                                                                                     | ---          | ---              | 0.14 | -7.03  | 8.21  | 7.11E-14 | 1 |
| 2015  | 17204081 | ---                                                                                     | ---          | ---              | 0.14 | -7.28  | 18.74 | 5.68E-14 | 1 |
| 4844  | 17209841 | ---                                                                                     | ---          | ---              | 0.11 | -8.86  | 13.20 | 8.53E-14 | 1 |
| 335   | 17200661 | ---                                                                                     | ---          | ---              | 0.11 | -8.89  | 11.93 | 0        | 1 |
| 3838  | 17207799 | ---                                                                                     | ---          | ---              | 0.11 | -9.29  | 10.45 | 0        | 1 |
| 2763  | 17205597 | ---                                                                                     | ---          | ---              | 0.10 | -10.15 | 15.72 | 8.53E-14 | 1 |
| 16024 | 17315396 | ---                                                                                     | ---          | ---              | 0.10 | -10.39 | 10.92 | 0        | 1 |
| 29247 | 17448793 | ---                                                                                     | ---          | ---              | 0.07 | -14.56 | 34.46 | 0        | 1 |
| 33699 | 17491193 | NM_011315 // Saa3 // serum amyloid A 3 // 7 B4 7 30.51 cM // 20210 /// ENSMUST000000069 | Saa3         | NM_011315        | 0.05 | -21.77 | 25.43 | 2.84E-13 | 1 |
| 38602 | 17538767 | ---                                                                                     | ---          | ---              | 0.03 | -35.81 | 21.79 | 1.71E-13 | 1 |
